# Supplementary material for: Home range size and habitat use of the blue-crowned laughingthrush during the breeding season
Source: PeerJ. 2020 Apr 21;8:e8785. doi: 10.7717/peerj.8785 (PMC7182022; doi:10.7717/peerj.8785)
Supplement: File S1 [file peerj-08-8785-s001.xlsx]

## Sheet: SM site
		ecological niche using frequency
	date	ground	brushwood	arbor substratum	arbor middle layer	arbor upper layer
	2018-04-17	9	30	50	50	5
	2018-04-18	33	4	4	119	40
	2018-04-19	1		26	4	5
	2018-04-20	17	73	96	17	44
	2018-04-24	19	28	132	2	30
	2018-04-25	20	51	22	1	31
	2018-04-27		13	50	11	49
	2018-05-01	4	6	33		43
	2018-05-06				3
	2018-05-12				3
	2018-05-16	10		16		25
	2018-06-06		4	5	16	5
	2018-06-12		1	14	8	7
	2018-06-21	3	7	26	14	2
	2018-06-27	15		3		1
	2018-07-02					5

## Sheet: HAK site
		ecological niche using frequency
	date	ground	brushwood	arbor substratum	arbor middle layer	arbor upper layer
	2018-05-01			5	34	53
	2018-05-02	10		10	14	29
	2018-05-04			15	18
	2018-05-06	16			7	20
	2018-05-07	2			4	5
	2018-05-08					7
	2018-05-09			2	16	32
	2018-05-10	8		3	10	51
	2018-05-11	2		3	28	32
	2018-05-13				5	9
	2018-05-15					3
	2018-05-17					8
	2018-05-20			2	3	5
	2018-05-21			1		4
	2018-05-23	1			10
	2018-05-24			5	9
	2018-05-25			2	12	13
	2018-05-26	1		1	2
	2018-05-27	2				20
	2018-05-28				6	3
	2018-05-29					1
	2018-06-07				4	1
	2018-06-09			2	5	10
	2018-06-10			6	17	1
	2018-06-11			4	8	16
	2018-06-13		2		9	5
	2018-06-14			5	1	6
	2018-06-19				18	2
	2018-06-20				8
	2018-06-21				3	4
	2018-06-22			4	3	6
	2018-06-28		13	20		1
	2018-06-29			40		22

## Sheet: HT site
		ecological niche using frequency
	date	ground	brushwood	arbor substratum	arbor middle layer	arbor upper layer
	2018-04-22			38
	2018-04-23	71		1	1	34
	2018-04-24	21		7	30	19
	2018-04-25	10		9	10	22
	2018-04-26			47	54	128
	2018-04-27	18	1	12	19	14
	2018-04-28	27		33	24	63
	2018-04-29	35		1	43	33
	2018-04-30	4			10
	2018-05-01	23	3	3	4	33
	2018-05-02	10		1	31	24
	2018-05-03	10
	2018-05-04	6		10	7	4
	2018-05-06			2	20	8
	2018-05-08		1	4	8	22
	2018-05-09			3	30	23
	2018-05-10			3	17	37
	2018-05-11		5	4	23	27
	2018-05-12			1	14	2
	2018-05-14			1	15	5
	2018-05-16	14	14	1	32	57
	2018-05-17			5	37	22
	2018-05-18	4		2	3	19
	2018-05-19				15	15
	2018-05-20			1	4	11
	2018-05-21	1		1		4
	2018-05-22			18		5
	2018-05-23	1		28		20
	2018-05-24	1	2	19		12
	2018-05-25			4	17	14
	2018-05-27	2		1	2	5
	2018-05-28	1		5	10	6
	2018-06-04			1
	2018-06-05			1
	2018-06-07			7	22	12
	2018-06-08			4	3	7
	2018-06-09			17	1
	2018-06-10			5	2	1
	2018-06-11			3	5	4
	2018-06-13		1	3	3
	2018-06-14		4	2	1	1
	2018-06-15
	2018-06-19			1	1	1
	2018-06-21		23	1	4	2
	2018-06-22				1
	2018-07-03				10	8

## Sheet: WD site
		ecological niche using frequency
	date	ground	brushwood	arbor substratum	arbor middle layer	arbor upper layer
	2018-04-24	5	61			104
	2018-04-25
	2018-04-26		127		20	40
	2018-04-27		20		7	20
	2018-04-28	16		81		26
	2018-04-29		54	10	3	2
	2018-04-30		30			5
	2018-05-01		2	10		18
	2018-05-02		22		12	6
	2018-05-03	1	72		24	49
	2018-05-04		38	9	5	17
	2018-05-05		40	73	3	42
	2018-05-06		36		1	30
	2018-05-08		5	188	18	42
	2018-05-09		15	17	32	24
	2018-05-10		7	12	87	58
	2018-05-11		7	22	14	89
	2018-05-12				6	17
	2018-05-13		3	7	17	14
	2018-05-14		13	3	61	149
	2018-05-15		7		5	60
	2018-05-16		5		4	50
	2018-05-17		1		6
	2018-05-18		2		2	5
	2018-05-19		7		3	3
	2018-05-21					3
	2018-05-22				7	1
	2018-05-23		2		9	11
	2018-05-24			2	6	3
	2018-05-25		3	7	2	5
	2018-05-27			1		5
	2018-05-28
	2018-05-29			18	15	12
	2018-05-30
	2018-06-08		6			3
	2018-06-09		16		20	3
	2018-06-10		12		5	1
	2018-06-11	1	23		6	4
	2018-06-13					9
	2018-06-19		5			4
	2018-06-21				12	11
	2018-06-23				5
	2018-06-29		16
	2018-07-03		10			10

## Sheet: CM site
		ecological niche using frequency
	date	ground	brushwood	arbor substratum	arbor middle layer	arbor upper layer
	2018-04-26		6		44	81
	2018-04-27	5		1		27
	2018-04-28	11	3	6		30
	2018-04-30				1
	2018-05-09			8	22	50
	2018-05-18				64	3
	2018-05-22				5	3
	2018-05-24				24
	2018-05-28					21
	2018-05-29				3	2
	2018-05-30			3	2	4
	2018-06-08			3	14	6
	2018-06-14				7
	2018-06-29					3
