# Supplementary material for: Home range size and habitat use of the blue-crowned laughingthrush during the breeding season
Source: PeerJ. 2020 Apr 21;8:e8785. doi: 10.7717/peerj.8785 (PMC7182022; doi:10.7717/peerj.8785)
Supplement: File S2 [file peerj-08-8785-s002.xlsx]

## Sheet: habitat and ecological niche 
		Water area	Grassplot	Shrubbery grassplot	Shrubbery	Woodland	Residential area	Vegetable plot	Farmland	total area/km^2				Water area	Grassplot	Shrubbery grassplot	Shrubbery	Woodland	Residential area	Vegetable plot	Farmland
available	SM	4.836	0	1.425	0.403	6.374	0.236	0	4.217	17.491		available proportion	SM	0.276485	0	0.0814705	0.0230404	0.364416	0.0134927	0	0.241095
	SJT	2.175	0	2.918	0	11.14	4.17	0	9.67	30.073			SJT	0.072324	0	0.0970306	0	0.370432	0.138663	0	0.321551
	HAK	0.146	0	11.72	0	17.65	14.412	3.02	41.2	88.148			HAK	0.00165631	0	0.132958	0	0.200231	0.163498	0.0342606	0.467396
	HT	0.125	0.043	1.063	0.597	6.857	6.937	0	13.709	29.331			HT	0.0042617	0.00146603	0.0362415	0.0203539	0.23378	0.236507	0	0.467389
	WD	2.451	0	4.326	1.981	5.86	6.26	0.293	12.33	33.501			WD	0.073162	0	0.12913	0.0591326	0.17492	0.18686	0.00874601	0.368049
	CM	0.109	0	0.786	0	3.64	7.057	0	3.135	14.727			CM	0.00740137	0	0.0533714	0	0.247165	0.479188	0	0.212874
		Water area	Grassplot	Shrubbery grassplot	Shrubbery	Woodland	Residential area	Vegetable plot	Farmland	total area/km^2				Water area	Grassplot	Shrubbery grassplot	Shrubbery	Woodland	Residential area	Vegetable plot	Farmland
used	SM	100	0	4	211	1676	0	0	0	1991		used proportion	SM	0.050226	0	0.00200904	0.105977	0.841788	0	0	0
	SJT					96				96			SJT	0	0	0	0	1	0	0	0
	HAK	7	10	0	13	545	0	66	0	641			HAK	0.0109204	0.0156006	0	0.0202808	0.850234	0	0.102964	0
	HT	0	157	39	44	1393	3	12	5	1653			HT	0	0.0949788	0.0235935	0.0266183	0.84271	0.00181488	0.00725953	0.0030248
	WD	0	7	45	579	1753	0	36	31	2451			WD	0	0.00285598	0.0183599	0.23623	0.715218	0	0.0146879	0.0126479
	CM	0	0	22	0	408	0	0	0	430			CM	0	0	0.0511628	0	0.948837	0	0	0
			ground	brushwood	arbor substratum	arbor middle layer	arbor upper layer	total frequency
	SM	April	198	290	416	145	539	1588
		May	10	6	41	11	83	151						Water area	Grassplot	Shrubbery grassplot	Shrubbery	Woodland	Residential area	Vegetable plot	Farmland
		June	18	9	45	31	40	143				available proportion	mean	7.25484	0.0244338	8.83671	1.70878	26.5157	20.3035	0.716776	34.6392
		total	226	305	502	187	662	1882				used proportion	mean	1.01911	1.89059	1.58542	6.4851	86.6465	0.030248	2.08186	0.261212
	SJT	April	0	0	0	0	0	0				available proportion	SD	9.61973	0.0546356	3.58572	2.11733	7.59401	14.0994	1.25301	9.94005
		May	0	0	3	6	9	18				used proportion	SD	1.83428	3.44672	1.82906	8.4579	9.03041	0.0676367	3.71249	0.462205
		June	0	0	60	0	22	82				available proportion	SE	3.92724	0.0223049	1.46386	0.864395	3.10024	5.75605	0.511539	4.05801
		total	0	0	63	6	31	100				used proportion	SE	0.748844	1.40712	0.74671	3.45292	3.68665	0.0276126	1.51562	0.188694
	HAK	April	0	0	0	0	0	0
		May	50	0	34	129	219	432
		June	7	13	22	66	57	165
		total	57	13	56	195	276	597
	HT	April	148	1	121	276	188	734
		May	82	20	96	259	290	747
		June	0	6	39	64	26	135
		total	230	27	256	599	504	1616
	WD	April	21	340	10	25	153	549
		May	2	262	370	279	562	1475
		June	0	94	0	45	64	203
		total	23	696	380	349	779	2227
	CM	April	13	3	3	38	143	200
		May	0	0	4	116	75	195
		June	0	0	3	20	6	29
		total	13	3	10	174	224	424
			ground	brushwood	arbor substratum	arbor middle layer	arbor upper layer	total frequency						ground	brushwood	arbor substratum	arbor middle layer	arbor upper layer
		April	198	290	416	145	539	1588					April	12.3738	20.6447	17.9095	15.7603	33.3116
			148	1	121	276	188	734					May	4.77137	9.54274	18.1577	26.5076	41.0205
			21	340	10	25	153	549					June	3.30251	16.1162	22.325	29.8547	28.4016
			13	3	3	38	143	200					total	8.01928	15.2498	18.5072	22.0567	36.1671
		May	10	6	41	11	83	151
			0	0	3	6	9	18
			50	0	34	129	219	432
			82	20	96	259	290	747
			2	262	370	279	562	1475
			0	0	4	116	75	195
		June	18	9	45	31	40	143
			0	0	60	0	22	82
			7	13	22	66	57	165
			0	6	39	64	26	135
			0	94	0	45	64	203
			0	0	3	20	6	29
			ground	brushwood	arbor substratum	arbor middle layer	arbor upper layer	total frequency
		April	0.124685	0.18262	0.261965	0.0913098	0.339421		4	12.4685	18.262	26.1965	9.13098	33.9421			ground	brushwood	arbor substratum	arbor middle layer	arbor upper layer
			0.201635	0.0013624	0.16485	0.376022	0.256131		4	20.1635	0.13624	16.485	37.6022	25.6131		April	10.7393	20.4572	11.5007	17.5717	39.731
			0.0382514	0.619308	0.0182149	0.0455373	0.278689		4	3.82514	61.9308	1.82149	4.55373	27.8689		May	4.8849	4.06893	15.2795	30.5923	45.1744
			0.065	0.015	0.015	0.19	0.715		4	6.5	1.5	1.5	19	71.5		June	2.80497	10.8204	26.2011	33.3698	26.8038
										6.2766	24.986	10.4225	12.6883	18.5931
		May	0.0662252	0.0397351	0.271523	0.0728477	0.549669		5	6.62252	3.97351	27.1523	7.28477	54.9669		SD	6.2766	24.986	10.4225	12.6883	18.5931		SE	2.56241	10.2005	4.25495	5.17998	7.59058
			0	0	0.166667	0.333333	0.5		5	0	0	16.6667	33.3333	50		SD	5.0853	6.31313	8.89576	16.0167	6.8931		SE	2.07606	2.57733	3.63168	6.53877	2.8141
			0.115741	0	0.0787037	0.298611	0.506944		5	11.5741	0	7.87037	29.8611	50.6944		SD	4.64101	16.1408	23.6101	21.9233	5.44535		SE	1.89468	6.58944	9.63877	8.95016	2.22305
			0.109772	0.0267738	0.128514	0.34672	0.38822		5	10.9772	2.67738	12.8514	34.672	38.822
			0.00135593	0.177627	0.250847	0.189153	0.381017		5	0.135593	17.7627	25.0847	18.9153	38.1017
			0	0	0.0205128	0.594872	0.384615		5	0	0	2.05128	59.4872	38.4615
										5.0853	6.31313	8.89576	16.0167	6.8931
		June	0.125874	0.0629371	0.314685	0.216783	0.27972		6	12.5874	6.29371	31.4685	21.6783	27.972
			0	0	0.731707	0	0.268293		6	0	0	73.1707	0	26.8293
			0.0424242	0.0787879	0.133333	0.4	0.345455		6	4.24242	7.87879	13.3333	40	34.5455
			0	0.0444444	0.288889	0.474074	0.192593		6	0	4.44444	28.8889	47.4074	19.2593
			0	0.463054	0	0.221675	0.315271		6	0	46.3054	0	22.1675	31.5271
			0	0	0.103448	0.689655	0.206897		6	0	0	10.3448	68.9655	20.6897
										4.64101	16.1408	23.6101	21.9233	5.44535

## Sheet: radio area proportion(km^2)
100% MCP		Water area	Grassplot	Shrubbery grassplot	Shrubbery	Woodland	Residential area	Vegetable plot	Farmland	Sandbeach
available	SJT	6.80178	0	17.9295	0	33.4304	2.5741	0	29.8679	9.29123
	SE	1.51477	0	1.95775	0	2.64812	1.05333	0	3.71688	1.19607
	HAK	0.179445	0	10.6281	0	20.362	0.842201	22.6575	45.3156	0
	SE	0.179445	0	1.96302	0	3.56844	0.225556	3.12223	2.95088	0
	WD	2.83132	0	31.6545	11.9976	11.1406	5.84872	0	36.5677	0
	SE	1.58407	0	5.75949	3.0186	1.41396	2.26048	0	3.98704	0
	male	3.40475	0	19.9124	3.99918	20.7054	2.99794	8.27663	36.9897	3.65573
	SE	1.22361	0	3.42233	1.93294	3.1198	0.949176	3.63552	3.02616	1.55985
	female	4.26601	0	18.4431	0	32.0352	0.74364	3.49192	35.4059	5.6
	SE	2.51807	0	2.23509	0	4.6787	0.526223	3.49192	6.82126	2.86883
	All	3.91981	0	19.0114	2.82295	24.3421	2.83522	6.66396	35.9877	4.37234
	SE	1.05088	0	2.49258	1.42152	2.78419	0.81619	2.71625	2.62523	1.28013
50% KDE		Water area	Grassplot	Shrubbery grassplot	Shrubbery	Woodland	Residential area	Vegetable plot	Farmland	Sandbeach
used	SJT	2.08832	0	34.8674	0	18.4466	2.57522	0	38.8338	3.29823
	SE	2.08832	0	0.926311	0	0.979515	2.57522	0	5.31162	1.20694
	HAK	0	0	0.129676	0	11.6195	0	47.243	40.9531	0
	SE	0	0	0.0973225	0	0.887296	0	2.79437	2.94265	0
	WD	2.78194	0	33.7664	19.7422	18.2637	7.12033	0	18.3069	0
	SE	2.19854	0	3.60031	9.3012	1.23201	5.06593	0	5.5105	0
	male	0.927312	0	22.8523	6.58073	16.1133	2.37344	15.9755	33.6317	1.57819
	SE	0.771857	0	4.99414	3.96719	0.956938	1.83229	6.89314	3.89305	0.942506
	female	0	0	26.3754	0	15.1958	0	11.1272	45.4855	1.86189
	SE	0	0	8.7991	0	2.13556	0	11.1272	2.02305	0.795266
	All	1.63731	0	24.3914	4.64522	16.3956	2.88724	13.895	34.6273	1.55211
	SE	1.08887	0	4.01123	2.86352	0.957474	1.70798	5.43459	3.59972	0.685051

## Sheet: radio site proportion
		available proportion（%）
	available	Water area	Shrubbery grassplot	Woodland	Residential area	Vegetable plot	Farmland	Sandbeach
1	20161MCP	0	27.3316	22.7273	0	23.7013	15.9091	10.4552
1	20162MCP	0	23.9748	22.3975	0	31.2303	20.8202	1.57729
1	20163MCP	9.25342	18.0897	32.9127	3.04942	15.3151	10.2101	11.2035
1	20164MCP	8.71576	10.4728	37.2093	9.24884	15.7752	10.5168	8.06105
1	20165MCP	7.24891	18.978	33.9383	0.741985	16.244	10.8294	11.98
1	20166MCP	9.81512	13.101	44.1568	2.23258	13.1001	8.73338	8.84269
1	20167MCP	9.37301	16.1069	37.8016	2.12483	13.941	9.29401	11.3959
1	20168MCP	10.0911	15.5235	36.6345	3.21401	14.1981	9.46538	10.9152
1	20171MCP	0.897227	9.89636	17.8311	1.19161	20.3162	49.8966	0
1	20172MCP	0	6.25924	8.54701	0.743389	29.6998	54.7009	0
1	20173MCP	0	11.2442	27.8075	1.11195	19.3404	40.4743	0
1	20174MCP	0	8.0222	19.9758	1.16406	29.9633	40.84	0
1	20175MCP	0	17.7187	27.6484	0	13.9677	40.6662	0
1	20181MCP	0.237467	45.6311	14.8058	12.5259	0	26.7597	0
1	20182MCP	4.97346	41.9735	11.6348	3.08356	0	38.3501	0
1	20183MCP	6.11435	35.0101	8.14889	4.73945	0	46.0201	0
1	20184MCP	0	51.8817	9.94624	3.03774	0	35.0462	0
		used proportion（%）
	used	Water area	Shrubbery grassplot	Woodland	Residential area	Vegetable plot	Farmland	Sandbeach
2	20161MCP	0	26.0274	39.726	0	13.6986	17.8082	2.73973
2	20162MCP	1.78571	30.3571	42.8571	0	16.0714	8.92857	0
2	20163MCP	0	37.2093	43.0233	0	10.4651	8.13953	1.16279
2	20164MCP	0	36.3636	45.4545	0	9.09091	9.09091	0
2	20165MCP	0	32.5843	35.9551	0	16.8539	12.3596	2.24719
2	20166MCP	1.25	31.25	36.25	0	15	13.75	2.5
2	20167MCP	0	27.7778	43.0556	0	12.5	12.5	4.16667
2	20168MCP	0	33.8028	40.8451	0	14.0845	8.4507	2.8169
2	20171MCP	2.27273	2.27273	55.1136	1.13636	17.0455	22.1591	0
2	20172MCP	0	4.16667	58.3333	0	13.8889	23.6111	0
2	20173MCP	0	7.05128	55.1282	0.641026	22.4359	14.7436	0
2	20174MCP	0	5.52486	55.2486	0	17.1271	22.0994	0
2	20175MCP	0.636943	7.00637	49.0446	0	22.293	21.0191	0
2	20181MCP	2.27273	27.2727	45.4545	9.09091	0	15.9091	0
2	20182MCP	0	37.8378	43.2432	5.40541	0	13.5135	0
2	20183MCP	1.35135	47.2973	37.8378	2.7027	0	10.8108	0		Water area	Shrubbery grassplot	Woodland	Residential area	Vegetable plot	Farmland	Sandbeach
2	20184MCP	2.04082	26.5306	53.0612	6.12245	0	12.2449	0
		WA	SG	WL	RA	VP	FL	SB
available	SJT	6.81216	17.9473	33.4722	2.57646	17.9381	11.9723	9.30384
	SE	1.51724	1.95527	2.65755	1.05318	2.22685	1.48962	1.19915
	HAK	0.179445	10.6281	20.362	0.842201	22.6575	45.3156	0
	SE	0.179445	1.96302	3.56844	0.225556	3.12223	2.95088	0
	WD	2.83132	43.6241	11.1339	5.84667	0	36.544	0
	SE	1.58407	3.52541	1.41582	2.26133	0	3.98993	0
	male	3.41167	23.9142	20.7311	2.99883	13.8729	31.4139	3.66414
	SE	1.22665	4.60673	3.13422	0.94904	3.31367	4.77697	1.56361
	female	4.26601	18.4431	32.0352	0.74364	18.6355	20.2623	5.6
	SE	2.51807	2.23509	4.6787	0.526223	4.25026	7.29457	2.86883
	All	3.92	21.84	24.36	2.83	15.11	27.56	4.38
	SE	1.05245	3.36955	2.79057	0.816122	2.5254	3.99099	1.28214
		WA	SG	WL	RA	VP	FL	SB
used	SJT	0.379464	31.9215	40.8958	0	13.4706	11.3784	1.95416
	SE	0.253523	1.37893	1.20405	0	0.946194	1.19136	0.515893
	HAK	0.581934	5.20438	54.5737	0.355478	18.5581	20.7265	0
	SE	0.440327	0.906431	1.51262	0.231345	1.66018	1.55144	0
	WD	1.41622	34.7346	44.8992	5.83037	0	13.1196	0
	SE	0.511013	4.91966	3.15611	1.31274	0	1.08136	0
	male	0.661469	23.5643	47.5059	2.09157	10.1038	15.1658	0.907174
	SE	0.289608	4.37977	2.10458	0.89552	2.31417	1.52706	0.42887
	female	0.918164	25.2994	41.0267	0	17.5546	14.0143	1.1868
	SE	0.385667	6.11484	3.11148	0	1.62453	2.54526	0.687138
	All	0.6829	24.7253	45.8606	1.4765	11.7976	14.5371	0.92
	SE	0.22319	3.39426	1.74364	0.667794	1.83201	1.24418	0.338018

## Sheet: T test
		Total	n	Habitat	F	T	df	P
		All （2016-2018）	17	Water area	97.685	3.01343	32	0.00501948
				Shrubbery grassplot	0.0161331	—0.604	32	0.549933
				Woodland	5.59815	—6.534	32	2.33192e-07
				Residential area	0.0696964	1.28771	32	0.207081
				Vegetable plot	0.769225	1.06037	32	0.296914
				Farmland	40.6395	3.11544	32	0.00385985
				Sandbeach	110.562	2.60821	32	0.0137176
		Males （2016-2018）	12	Water area	40.029	2.18281	22	0.0400072
				Shrubbery grassplot	0.151146	0.0549304	22	0.95669
				Woodland	2.10831	—7.093	22	4.09527e-07
				Residential area	0.377687	0.694019	22	0.494934
				Vegetable plot	1.42321	0.932323	22	0.36129
				Farmland	19.6014	3.24002	22	0.00375981
				Sandbeach	41.4391	1.70029	22	0.103172
		Females（2016-2018）	4	Water area	44.1841	1.31351	6	0.237001
				Shrubbery grassplot	3.26962	—1.053	6	0.332672
				Woodland	0.615632	—1.600	6	0.160681
				Residential area	6.02018	1.41263	6	0.207476
				Vegetable plot	2.75049	0.237917	6	0.819862
				Farmland	2.56555	0.808525	6	0.44965
				Sandbeach	25.3606	1.49602	6	0.185283
		Ⅰ（2016）	8	Water area	12.1386	4.18134	14	0.000923463
				Shrubbery grassplot	0.606461	—5.842	14	4.27771e-05
				Woodland	2.79529	—2.545	14	0.0233269
				Residential area	6.66298	2.44449	14	0.0283424
				Vegetable plot	3.60037	1.84729	14	0.0859445
				Farmland	0.19763	0.311254	14	0.760194
				Sandbeach	1.96389	5.62979	14	6.20978e-05
		Ⅱ（2017）	5	Water area	2.02517	—0.846	8	0.422184
				Shrubbery grassplot	1.33521	2.5082	8	0.0364731
				Woodland	2.64639	—8.826	8	2.13901e-05
				Residential area	0.11166	1.49761	8	0.17261
				Vegetable plot	3.71724	1.15917	8	0.279815
				Farmland	5.42136	7.37477	8	7.80592e-05
		Ⅲ (2018)	4	Water area	28.8132	0.85092	6	0.427462
				Shrubbery grassplot	0.987275	1.46824	6	0.192419
				Woodland	1.23418	—9.762	6	6.64532e-05
				Residential area	1.18461	0.00669013	6	0.994879
				Farmland	2.9047	5.66728	6	0.00129832
