# Supplementary material for: Home range size and habitat use of the blue-crowned laughingthrush during the breeding season
Source: PeerJ. 2020 Apr 21;8:e8785. doi: 10.7717/peerj.8785 (PMC7182022; doi:10.7717/peerj.8785)
Supplement: File S3 [file peerj-08-8785-s003.xlsx]

## Sheet: Sheet3
	ID	Sex	Capture site	Capture date	Date of last transmission	Tracking time (Day)	No. of effective locations	Home Range 100% MCP Size（ha）	Home Range 95% MCP Size（ha）	Home Range 90% MCP Size（ha）	Home Range 85% MCP Size（ha）	Home Range 80% MCP Size（ha）	0.7	0.6	0.5	Core Range 95% KDE Size（ha）	Core Range 90% KDE Size（ha）	Core Range 85% KDE Size（ha）	Core Range 80% KDE Size（ha）	0.7	0.6	Core Range 50% KDE Size（ha）	Sex	Estimated percent of Core Rang KDE	Core Rang Size
	20161	♂	Ⅰ	2016-05-11	2016-06-05	15	73	3.081	2.122	1.486	1.419	1.266	0.973	0.717	0.441	4.503	3.45	2.807	2.339	1.696	1.257	0.936	♂	76.4701	2.0393
	20162	♀	Ⅰ	2016-05-12	2016-06-05	14	56	3.168	2.359	1.857	1.585	1.53	1.296	1.122	0.782	5.283	4.23	3.527	2.993	2.734	1.772	1.354	♀	64.5068	1.91296
	20163	♂	Ⅰ	2016-05-14	2016-06-05	12	86	9.506	7.708	6.988	5.579	4.834	4.075	2.8	2.51	17.45	13.857	11.462	9.751	7.271	5.474	4.02	♂	74.8104	7.56244
	20164	？	Ⅰ	2016-05-14	2016-06-05	12	43	15.422	13.896	13.053	12.37	11.392	8.355	5.411	4.07	20.064	15.884	13.283	11.24	8.174	5.945	4.273	?♀?	81	18.8691
	20165	♀	Ⅰ	2016-05-27	2016-06-05	10	90	11.063	9.899	7.162	3.994	2.937	2.446	1.683	1.098	22.064	16.407	12.73	10.325	7.072	5.092	3.677	♀	81.1265	7.53498
	20166	♀	Ⅰ	2016-05-27	2016-06-05	10	80	14.22	12.49	11.573	10.26	8.956	7.033	5.663	4.685	29.452	23.699	20	17.397	13.425	10.411	7.945	♀	66.5504	11.3276
	20167	♂	Ⅰ	2016-05-29	2016-06-05	8	72	11.229	10.031	9.095	8.241	7.367	4.175	3.308	3.049	23.389	18.807	15.943	13.843	10.597	8.019	5.919	♂	76.0563	11.6518
	20168	♂	Ⅰ	2016-05-29	2016-06-05	8	71	11.482	9.161	7.666	6.418	4.596	3.492	3.036	1.985	20.064	15.884	13.283	11.24	8.174	5.945	4.273	♂	77.2797	9.64691
	20171	♂	Ⅱ	2017-05-09	2017-06-10	22	176	13.703	9.958	7.045	5.802	5.03	3.381	2.511	1.833	14.405	11.008	8.608	7.027	4.977	3.63	2.576	♂	79.6129	6.80441
	20172	♂	Ⅱ	2017-05-09	2017-06-10	22	72	8.083	6.121	5.136	3.908	3.333	2.282	1.744	0.979	11.156	8.684	7.105	5.904	4.188	2.986	2.094	♂	82.5644	6.3299
	20173	♂	Ⅱ	2017-05-10	2017-06-10	21	156	16.744	10.968	7.654	6.91	6.352	4.034	3.098	2.455	18.001	13.179	10.286	8.438	6.107	4.661	3.455	♂	79.9569	8.29344
	20174	♂	Ⅱ	2017-05-10	2017-06-10	21	181	8.203	6.463	5.268	4.041	3.616	2.819	2.023	1.507	9.338	7.34	6.157	5.26	3.874	2.854	2.12	♂	81.5746	5.42276
	20175	♀	Ⅱ	2017-05-19	2017-06-20	17	157	18.015	13.288	9.179	8.403	7.354	4.473	3.247	2.094	22.065	16.407	12.73	10.325	7.072	5.092	3.677	♀	82.2787	11.0891
	20181	♂	Ⅲ	2018-05-02	2018-06-10	17	43	4.105	2.87	2.312	1.945	1.327	1.112	0.76	0.644	6.586	5.208	4.278	3.562	2.541	1.861	1.342	♂	77.9364	3.2176
	20182	♂	Ⅲ	2018-05-02	2018-06-10	17	37	6.591	6.284	5.84	5.416	5.147	4.634	4.089	3.847	30.411	24.309	20.668	17.912	13.778	10.629	7.972	♂	81.8925	2.86997
	20183	♂	Ⅲ	2018-05-02	2018-06-10	17	73	12.582	10.767	9.523	8.822	6.953	4.713	4.171	2.025	23.937	15.751	15.751	13.368	9.844	7.047	4.663	♂	86.8792	15.8605
	20184	♂	Ⅲ	2018-05-02	2018-06-10	17	49	3.715	2.711	2.473	2.183	2.012	1.72	1.223	0.771	6.336	4.182	4.182	3.575	2.676	2.028	1.526	♂	72.8366	2.81239

## Sheet: Sheet1
overlap results
Year2018		1	2	3	4
	1	0.442935	0.0271739	0.108696	0.527508
	2		0.184466	0.381877	0.04329
	3	0.246753		0.21645	0.132013
	4	0.389439	0.165017
Year2016
		1	2	3	4	5	6	7	8
	1		0.253247	0.292208	0.376623	0.162338	0.311688	0.409091	0.376623
	2	0.123418		0.0822785	0.13924	0.481013	0.0949367	0.18038	0.13924
	3	0.220588	0.127451		0.367647	0.0784314	0.936275	0.367647	0.367647
	4	0.268518	0.203704	0.347222		0.138889	0.351852	0.958333	1
	5	0.160256	0.974359	0.102564	0.192308		0.115385	0.275641	0.192308
	6	0.223256	0.139535	0.888372	0.353488	0.0837209		0.353488	0.353488
	7	0.257143	0.232653	0.306122	0.844898	0.17551	0.310204		0.844898
	8	0.268518	0.203704	0.347222	1	0.138889	0.351852	0.958333
Year2017
		1	2	3	4	5
	1		0.243902	0.235772	0.219512	0.0569106
	2	0.184615		0	0	0
	3	0.258929	0		0.794643	0.258929
	4	0.235808	0	0.777293		0.401747
	5	0.0897436	0	0.371795	0.589744
