# Supplementary material for: Home range size and habitat use of the blue-crowned laughingthrush during the breeding season
Source: PeerJ. 2020 Apr 21;8:e8785. doi: 10.7717/peerj.8785 (PMC7182022; doi:10.7717/peerj.8785)
Supplement: File S5 [file peerj-08-8785-s005.xlsx]

## Sheet: 20171 original data
				receive signal site coordinate
	date	time	No.	N	E	elevation/m	angle of signal direction
	2017-05-09	15:58:00	1	29°6′21.23″	117°48′10.47″		158°
	2017-05-09	16:47:00	1	29°6′17.06″	117°48′9.5″		64°
	2017-05-09	16:57:00	1	29°6′17.33″	117°48′9.7″	57	102°
	2017-05-09	17:35:00	1	29°6′22.02″	117°48′11.29″		/
	2017-05-09	18:22:00	1	29°6′19.23″	117°48′9.99″		120°
	2017-05-09	18:30:00	1	29°6′18.52″	117°48′10.13″		75°
	2017-05-09	18:47:00	1	29°6′21.89″	117°48′14.24″		213°
	2017-05-10	06:51:00	1	29°6′21.89″	117°48′14.24″		215°
	2017-05-10	06:57:00	1	29°6′19.1″	117°48′13.69″		270°
	2017-05-10	08:47:00	1	29°6′18.94″	117°48′9.9″		116°
	2017-05-10	08:58:00	1	29°6′18.7″	117°48′9.5″		92°
	2017-05-10	09:06:00	1	29°6′14.73″	117°48′9.68″		/
	2017-05-10	09:36:00	1	29°6′16.44″	117°48′4.64″		/
	2017-05-10	09:51:00	1	29°6′19.31″	117°48′7.79″		/
	2017-05-10	11:48:00	1	29°6'18.37"	117°48'11.99"		activity in this site
	2017-05-10	14:19:00	1				/
	2017-05-10	15:20:00	1	29°6'18.37"	117°48'11.99"		activity in this site
	2017-05-10	15:36:00	1	29°6'18.37"	117°48'11.99"		activity in this site
	2017-05-10	16:16:00	1	29°6′17.1″	117°48′8.5″		70°
	2017-05-10	16:24:00	1	29°6′14.98″	117°48′9.49″	55	/
	2017-05-10	17:02:00	1	29°6′17.52″	117°48′5.62″	57	/
	2017-05-10	17:11:00	1	29°6′20.14″	117°48′8.59″		/
	2017-05-10	17:20:00	1	29°6′20.96″	117°48′11.39″		/
	2017-05-10	18:00:00	1	29°6′18.66″	117°48′11.24″		81°
	2017-05-10	18:05:00	1	29°6′17.47″	117°48′9.58″	57	61°
	2017-05-10	18:30:00	1	29°6'18.37"	117°48'11.99"		activity in this site
	2017-05-11	06:50:00	1	29°6'18.37"	117°48'11.99"		activity in this site
	2017-05-11	09:34:00	1	29°6′14.35″	117°48′24.05″		/
	2017-05-11	09:39:00	1	29°6′14.02″	117°48′21.49″		/
	2017-05-11	10:24:00	1	29°6′15.56″	117°48′3.85″		/
	2017-05-11	10:28:00	1	29°6′18.95″	117°48′7.4″		108°
	2017-05-11	11:25:00	1	29°6'18.37"	117°48'11.99"		activity in this site
	2017-05-11	14:35:00	1	29°6'18.37"	117°48'11.99"		activity in this site
	2017-05-11	16:16:00	1	29°6'18.37"	117°48'11.99"		activity in this site
	2017-05-11	16:30:00	1	29°6′23.11″	117°48′12.97″		191°
	2017-05-11	17:09:00	1	29°6′17.54″	117°48′5.85″	57	85°
	2017-05-11	18:15:00	1	29°6'18.37"	117°48'11.99"		activity in this site
	2017-05-11	18:25:00	1	29°6'18.37"	117°48'11.99"		activity in this site
	2017-05-12	08:59:00	1	29°6′15.02″	117°48′9.47″	55	49°
	2017-05-12	09:10:00	1	29°6′17.24″	117°48′9.47″	55	73°
	2017-05-12	09:43:00	1	29°6′20.48″	117°48′13.87″		204°
	2017-05-12	09:50:00	1	29°6′21.29″	117°48′10.57″		139°
	2017-05-12	14:15:00	1	29°6′17.24″	117°48′9.47″	55	68°
	2017-05-12	14:20:00	1	29°6′15.02″	117°48′9.47″	55	48°
	2017-05-12	14:56:00	1	29°6′17.24″	117°48′9.47″	55	67°
	2017-05-12	15:00:00	1	29°6′17.88″	117°48′8″	55	64°
	2017-05-12	15:40:00	1	29°6′15.02″	117°48′9.47″	55	44°
	2017-05-12	15:45:00	1	29°6′17.24″	117°48′9.47″	55	60°
	2017-05-12	16:30:00	1	29°6′17.24″	117°48′9.47″	55	70°
	2017-05-12	16:40:00	1	29°6′15.02″	117°48′9.47″	55	49°
	2017-05-12	17:15:00	1	29°6′20.96″	117°48′10.31″		129°
	2017-05-12	17:20:00	1	29°6′18.57″	117°48′7″		92°
	2017-05-12	17:50:00	1	29°6′15.02″	117°48′9.47″	55	57°
	2017-05-12	17:55:00	1	29°6′17.24″	117°48′9.47″	55	62°
	2017-05-13	07:20:00	1	29°6′17.24″	117°48′9.47″	55	54°
	2017-05-13	07:25:00	1	29°6′15.02″	117°48′9.47″	55	38°
	2017-05-13	08:00:00	1	29°6′15.02″	117°48′9.47″	55	38°
	2017-05-13	08:01:00	1	29°6′17.24″	117°48′9.47″	55	57°
	2017-05-13	09:04:00	1	29°6′21.04″	117°48′10.34″	56	182°
	2017-05-13	09:10:00	1	29°6′18.34″	117°48′6.8″	57	87°
	2017-05-13	09:40:00	1	29°6′18.34″	117°48′6.8″	57	100°
	2017-05-13	09:45:00	1	29°6′21.04″	117°48′10.34″	56	173°
	2017-05-13	10:27:00	1	29°6′17.97″	117°48′8.06″	58	75°
	2017-05-13	10:35:00	1	29°6′17.24″	117°48′9.47″	57	40°
	2017-05-13	10:40:00	1	29°6′15.02″	117°48′9.47″	55	31°
	2017-05-13	11:15:00	1	29°6′18.34″	117°48′6.8″	57	92°
	2017-05-13	11:20:00	1	29°6′21.04″	117°48′10.34″	56	178°
	2017-05-13	14:50:00	1	29°6'18.37"	117°48'11.99"		activity in this site
	2017-05-13	15:50:00	1	29°6'18.37"	117°48'11.99"		activity in this site
	2017-05-13	16:40:00	1	29°6′15.02″	117°48′9.47″	55	28°
	2017-05-13	16:50:00	1	29°6′17.24″	117°48′9.47″	57	53°
	2017-05-13	18:05:00	1	29°6′17.24″	117°48′9.47″	57	65°
	2017-05-13	18:10:00	1	29°6′15.02″	117°48′9.47″	55	40°
	2017-05-14	17:05:00	1	29°6′17.97″	117°48′8.06″	58	80°
	2017-05-14	17:10:00	1	29°6′17.24″	117°48′9.47″	57	58°
	2017-05-14	17:45:00	1	29°6′21.04″	117°48′10.34″	56	160°
	2017-05-14	17:50:00	1	29°6′18.34″	117°48′6.8″	57	97°
	2017-05-14	18:20:00	1	29°6′15.02″	117°48′9.47″	55	28°
	2017-05-14	18:25:00	1	29°6′17.24″	117°48′9.47″	57	56°
	2017-05-15	16:20:00	1	29°6′19.74″	117°48′13.33″		231°
	2017-05-15	16:30:00	1	29°6′17.97″	117°48′8.06″	58	80°
	2017-05-15	17:00:00	1	29°6′17.24″	117°48′9.47″	57	/
	2017-05-15	17:05:00	1	29°6′15.02″	117°48′9.47″	55	/
	2017-05-15	17:35:00	1	29°6′17.77″	117°48′11.42″	57	23°
	2017-05-15	17:45:00	1	29°6′17.24″	117°48′9.47″	57	66°
	2017-05-15	17:52:00	1	29°6′15.02″	117°48′9.47″	55	32°
	2017-05-16	08:05:00	1	29°6′18.34″	117°48′6.8″	57	/
	2017-05-16	08:15:00	1	29°6′21.04″	117°48′10.34″	56	/
	2017-05-16	08:30:00	1	29°6'18.37"	117°48'11.99"		activity in this site
	2017-05-16	09:00:00	1	29°6′17.24″	117°48′9.47″	57	77°
	2017-05-16	09:05:00	1	29°6′15.02″	117°48′9.47″	55	/
	2017-05-16	16:30:00	1	29°6′21.04″	117°48′10.34″	56	153°
	2017-05-16	16:35:00	1	29°6′18.34″	117°48′6.8″	57	93°
	2017-05-16	17:12:00	1	29°6′17.24″	117°48′9.47″	57	68°
	2017-05-16	17:15:00	1	29°6′15.02″	117°48′9.47″	55	43°
	2017-05-16	16:00:00	1	29°6'18.37"	117°48'11.99"		activity in this site
	2017-05-18	15:15:00	1	29°6′13.2″	117°48′16.22″	56.1	334°
	2017-05-18	15:25:00	1	29°6′13.33″	117°48′12.59″	54.8	/
	2017-05-18	15:30:00	1	29°6′15.02″	117°48′9.47″	55	38°
	2017-05-18	16:10:00	1	29°6′15.02″	117°48′9.47″	55	38°
	2017-05-18	16:15:00	1	29°6′17.24″	117°48′9.47″	57	56°
	2017-05-18	16:55:00	1	29°6′17.24″	117°48′9.47″	57	70°
	2017-05-18	17:00:00	1	29°6′15.02″	117°48′9.47″	55	36°
	2017-05-18	17:50:00	1	29°6′17.24″	117°48′9.47″	57	59°
	2017-05-18	17:55:00	1	29°6′17.97″	117°48′8.06″	58	82°
	2017-05-18	18:25:00	1	29°6′18.34″	117°48′6.8″	57	101°
	2017-05-18	18:30:00	1	29°6′21.04″	117°48′10.34″	56	89°
	2017-05-18	18:40:00	1	29°6′19.31″	117°48′11.32″		144°
	2017-05-18	18:50:00	1	29°6′17.87″	117°48′12.35″	57	349°
	2017-05-18	18:55:00	1	29°6′19.67″	117°48′13.36″		224°
	2017-05-19	10:16:00	1	29°6′18.09″	117°48′9.98″		84°
	2017-05-19	10:20:00	1	29°6′17.24″	117°48′9.47″	57	63°
	2017-05-19	10:55:00	1	29°6′17.77″	117°48′11.42″	57	28°
	2017-05-19	11:00:00	1	29°6′17.24″	117°48′9.47″	57	48°
	2017-05-19	11:23:00	1	29°6′17.24″	117°48′9.47″	57	45°
	2017-05-19	11:34:00	1	29°6′15.02″	117°48′9.47″	55	34°
	2017-05-19	11:38:00	1	29°6′18.19″	117°48′10.4″	57.1	66°
	2017-05-19	17:05:00	1	29°6′18.19″	117°48′10.4″	57.1	24°
	2017-05-19	17:13:00	1	29°6′17.24″	117°48′9.47″	57	48°
	2017-05-19	17:45:00	1	29°6′17.24″	117°48′9.47″	57	58°
	2017-05-19	17:55:00	1	29°6′17.97″	117°48′8.06″	58	77°
	2017-05-19	18:30:00	1	29°6′16.87″	117°48′11.82″	57	12°
	2017-05-19	18:36:00	1	29°6′21.79″	117°48′14.47″	58	212°
	2017-05-20	15:21:00	1	29°6′14.24″	117°48′23.39″		/
	2017-05-20	15:28:00	1	29°6′13.64″	117°48′19.04″		/
	2017-05-20	15:35:00	1	29°6′16.71″	117°48′16.43″		307°
	2017-05-20	15:48:00	1	29°6′16.87″	117°48′11.82″	57	1°
	2017-05-20	16:18:00	1	29°6′17.24″	117°48′9.47″	57	51°
	2017-05-20	16:25:00	1	29°6′15.02″	117°48′9.47″	55	32°
	2017-05-20	17:05:00	1	29°6′15.02″	117°48′9.47″	55	37°
	2017-05-20	17:15:00	1	29°6′17.24″	117°48′9.47″	57	64°
	2017-05-20	17:35:00	1	29°6′18.34″	117°48′6.8″	57	86°
	2017-05-20	17:52:00	1	29°6′18.34″	117°48′6.8″	57	95°
	2017-05-20	17:57:00	1	29°6′21.04″	117°48′10.34″	56	154°
	2017-05-20	18:25:00	1	29°6′15.02″	117°48′9.47″	55	38°
	2017-05-20	18:35:00	1	29°6′16.87″	117°48′11.82″	57	10°
	2017-05-20	18:46:00	1	29°6′21.79″	117°48′14.47″	58	220°
	2017-05-21	07:32:00	1	29°6′16.87″	117°48′11.82″	57	2°
	2017-05-21	07:40:00	1	29°6′15.02″	117°48′9.47″	55	37°
	2017-05-21	07:45:00	1	29°6′17.24″	117°48′9.47″	57	58°
	2017-05-21	08:18:00	1	29°6′17.24″	117°48′9.47″	57	54°
	2017-05-21	08:23:00	1	29°6′17.97″	117°48′8.06″	58	68°
	2017-05-21	09:00:00	1	29°6′18.34″	117°48′6.8″	57	89°
	2017-05-21	09:08:00	1	29°6′21.04″	117°48′10.34″	56	165°
	2017-05-21	09:40:00	1	29°6′17.24″	117°48′9.47″	57	55°
	2017-05-21	09:48:00	1	29°6′15.02″	117°48′9.47″	55	35°
	2017-05-21	10:25:00	1	29°6′16.87″	117°48′11.82″	57	14°
	2017-05-21	10:30:00	1	29°6′14.69″	117°48′10.7″	56	17°
	2017-05-21	10:55:00	1	29°6′14.69″	117°48′10.7″	56	17°
	2017-05-21	11:03:00	1	29°6′15.02″	117°48′9.47″	55	33°
	2017-05-21	11:08:00	1	29°6′17.24″	117°48′9.47″	57	48°
	2017-05-21	11:34:00	1	29°6′17.24″	117°48′9.47″	57	62°
	2017-05-21	11:35:00	1	29°6′17.97″	117°48′8.06″	58	66°
	2017-05-21	15:48:00	1	29°6′17.24″	117°48′9.47″	57	53°
	2017-05-21	15:53:00	1	29°6′15.02″	117°48′9.47″	55	33°
	2017-05-21	16:28:00	1	29°6′15.02″	117°48′9.47″	55	32°
	2017-05-21	16:35:00	1	29°6′17.24″	117°48′9.47″	57	62°
	2017-05-21	17:00:00	1	29°6′21.04″	117°48′10.34″	56	153°
	2017-05-21	17:08:00	1	29°6′18.34″	117°48′6.8″	57	88°
	2017-05-21	17:15:00	1	29°6′17.97″	117°48′8.06″	58	74°
	2017-05-21	17:20:00	1	29°6′15.02″	117°48′9.47″	55	40°
	2017-05-21	17:50:00	1	29°6′15.02″	117°48′9.47″	55	38°
	2017-05-21	17:55:00	1	29°6′17.24″	117°48′9.47″	57	58°
	2017-05-21	18:00:00	1	29°6′17.97″	117°48′8.06″	58	73°
	2017-05-21	18:22:00	1	29°6′17.97″	117°48′8.06″	58	73°
	2017-05-21	18:28:00	1	29°6′18.34″	117°48′6.8″	57	87°
	2017-05-21	18:35:00	1	29°6′21.04″	117°48′10.34″	56	157°
	2017-05-22	15:50:00	1	29°6′17.97″	117°48′8.06″	58	76°
	2017-05-22	16:04:00	1	29°6′17.24″	117°48′9.47″	57	63°
	2017-05-22	16:33:00	1	29°6′15.02″	117°48′9.47″	55	34°
	2017-05-22	16:35:00	1	29°6′14.69″	117°48′10.7″	56	20°
	2017-05-22	16:43:00	1	29°6′16.87″	117°48′11.82″	57	11°
	2017-05-22	16:52:00	1	29°6′17.24″	117°48′9.47″	57	65°
	2017-05-22	17:26:00	1	29°6′17.97″	117°48′8.06″	58	80°
	2017-05-22	17:30:00	1	29°6′18.34″	117°48′6.8″	57	/
	2017-05-22	17:35:00	1	29°6′21.04″	117°48′10.34″	56	152°
	2017-05-22	17:56:00	1	29°6′21.04″	117°48′10.34″	56	156°
	2017-05-22	18:05:00	1	29°6′18.34″	117°48′6.8″	57	99°
	2017-05-22	18:10:00	1	29°6′17.97″	117°48′8.06″	58	78°
	2017-05-22	18:15:00	1	29°6′17.24″	117°48′9.47″	57	67°
	2017-05-22	18:35:00	1	29°6′16.87″	117°48′11.82″	57	19°
	2017-05-22	18:40:00	1	29°6′21.79″	117°48′14.47″	58	211°
	2017-05-26	08:05:00	1	29°6′18.41″	117°48′11.26″		49°
	2017-05-26	08:20:00	1	29°6′17.97″	117°48′8.06″	58	79°
	2017-05-26	08:30:00	1	29°6′15.02″	117°48′9.47″	55	38°
	2017-05-26	08:50:00	1	29°6′18.34″	117°48′6.8″	57	90°
	2017-05-26	08:55:00	1	29°6′17.97″	117°48′8.06″	58	162°
	2017-05-26	09:20:00	1	29°6′17.24″	117°48′9.47″	57	64°
	2017-05-26	09:25:00	1	29°6′15.02″	117°48′9.47″	55	34°
	2017-05-26	09:50:00	1	29°6′15.02″	117°48′9.47″	55	33°
	2017-05-26	09:53:00	1	29°6′17.24″	117°48′9.47″	57	53°
	2017-05-26	10:20:00	1	29°6′21.04″	117°48′10.34″	56	85°
	2017-05-26	10:25:00	1	29°6′21.88″	117°48′11.61″		/
	2017-05-26	10:50:00	1	29°6′21.79″	117°48′14.47″	58	203°
	2017-05-26	10:56:00	1	29°6′16.87″	117°48′11.82″	57	21°
	2017-05-26	11:20:00	1	29°6′17.24″	117°48′9.47″	57	66°
	2017-05-26	11:25:00	1	29°6′15.02″	117°48′9.47″	55	37°
	2017-05-26	11:45:00	1	29°6′15.02″	117°48′9.47″	55	34°
	2017-05-26	11:48:00	1	29°6′17.24″	117°48′9.47″	57	64°
	2017-05-26	16:00:00	1	29°6′16.87″	117°48′11.82″	57	33°
	2017-05-26	16:06:00	1	29°6′21.79″	117°48′14.47″	58	19°
	2017-05-26	16:30:00	1	29°6′15.02″	117°48′9.47″	55	48°
	2017-05-26	16:35:00	1	29°6′17.97″	117°48′8.06″	58	80°
	2017-05-26	17:00:00	1	29°6′17.24″	117°48′9.47″	57	70°
	2017-05-26	17:05:00	1	29°6′15.02″	117°48′9.47″	55	35°
	2017-05-26	17:34:00	1	29°6′18.34″	117°48′6.8″	57	94°
	2017-05-26	17:40:00	1	29°6′17.97″	117°48′8.06″	58	80°
	2017-05-26	18:00:00	1	29°6′15.02″	117°48′9.47″	55	42°
	2017-05-26	18:08:00	1	29°6′14.69″	117°48′10.7″	56	18°
	2017-05-26	18:28:00	1	29°6′14.69″	117°48′10.7″	56	20°
	2017-05-26	18:30:00	1	29°6′16.87″	117°48′11.82″	57	17°
	2017-05-26	18:55:00	1	29°6′17.24″	117°48′9.47″	57	61°
	2017-05-26	19:00:00	1	29°6′21.79″	117°48′14.47″	58	200°
	2017-05-26	08:20:00	1	29°06′20.9″	117°48′14.5″	52.9	/
	2017-05-26	08:50:00	1	29°06′19.1″	117°48′17.1″		140°
	2017-05-26	09:20:00	1	29°06′9.9″	117°48′15.4″		298°
	2017-05-26	09:50:00	1	29°06′10.3″	117°48′10.9″		/
	2017-05-26	10:20:00	1	29°06′14.5″	117°48′9.0″		/
	2017-05-26	10:50:00	1	29°06′15.5″	117°48′3.9″		/
	2017-05-26	11:20:00	1	29°06′21.2″	117°48′10.8″		/
	2017-05-26	11:50:00	1	29°06′12.3″	117°48′18.1″		/
	2017-05-26	16:00:00	1	29°06′12.8″	117°48′18.2″		294°
	2017-05-26	16:30:00	1	29°06′10.5″	117°48′10.3″		/
	2017-05-26	17:00:00	1	29°06′16.3″	117°48′4.2″		/
	2017-05-26	17:30:00	1	29°06′21.2″	117°48′10.3″		/
	2017-05-26	18:00:00	1	29°06′21.9″	117°48′14.0″		/
	2017-05-26	18:30:00	1	29°06′18.4″	117°48′18.1″		32°
	2017-05-26	19:00:00	1	29°06′12.3″	117°48′12.0″		/
	2017-05-27	10:00:00	1	29°6′17.97″	117°48′8.06″	58	87°
	2017-05-27	10:10:00	1	29°6′18.34″	117°48′6.8″	57	90°
	2017-05-27	10:30:00	1	29°6′15.02″	117°48′9.47″	55	42°
	2017-05-27	10:38:00	1	29°6′14.69″	117°48′10.7″	56	27°
	2017-05-27	10:45:00	1	29°6′21.79″	117°48′14.47″	58	226°
	2017-05-27	11:00:00	1	29°6′21.04″	117°48′10.34″	56	160°
	2017-05-27	11:04:00	1	29°6′18.34″	117°48′6.8″	57	92°
	2017-05-27	16:20:00	1	29°6′15.02″	117°48′9.47″	55	34°
	2017-05-27	16:30:00	1	29°6′17.24″	117°48′9.47″	57	66°
	2017-05-27	16:46:00	1	29°6′17.24″	117°48′9.47″	57	70°
	2017-05-27	16:55:00	1	29°6′16.87″	117°48′11.82″	57	5°
	2017-05-27	17:20:00	1	29°6′15.02″	117°48′9.47″	55	38°
	2017-05-27	10:00:00	1	29°06′16.0″	117°48′9.0″		/
	2017-05-27	10:30:00	1	29°06′13.1″	117°48′12.8″		/
	2017-05-27	11:00:00	1	29°06′15″	117°48′16″		118°
	2017-05-27	11:10:00	1	29°06′20″	117°48′11″		122°
	2017-05-27	16:20:00	1	29°06′19″	117°48′15″	49.8	96°
	2017-05-27	16:50:00	1	29°06′20″	117°48′11″		/
	2017-05-27	17:20:00	1	29°06′17″	117°48′09″	49.7	104°
	2017-05-27	17:50:00	1	29°06′15″	117°48′09″		97°
	2017-05-27	18:20:00	1	29°06′12″	117°48′12″		/
	2017-05-27	18:50:00	1	29°06′14″	117°48′16″		56°
	2017-05-28	07:19:00	1	29°6′11.92″	117°48′17.93″	52.6	/
	2017-05-28	07:30:00	1	29°6′9.11″	117°48′16.34″		/
	2017-05-28	07:55:00	1	29°6′7.85″	117°48′12.59″	55.1	/
	2017-05-28	08:10:00	1	29°6′10.25″	117°48′15.03″	51.5	/
	2017-05-28	08:25:00	1	29°6′8.69″	117°48′10.42″	52.7	/
	2017-05-28	08:35:00	1	29°6′10.87″	117°48′13.16″	51.1	/
	2017-05-28	08:50:00	1	29°6′13.28″	117°48′12.67″	52.7	/
	2017-05-28	09:03:00	1	29°6′15.02″	117°48′9.47″	55	47°
	2017-05-28	09:11:00	1	29°6′16.87″	117°48′11.82″	57	15°
	2017-05-28	10:18:00	1	29°6′17.24″	117°48′9.47″	57	69°
	2017-05-28	10:25:00	1	29°6′15.02″	117°48′9.47″	55	41°
	2017-05-28	10:55:00	1	29°6′17.24″	117°48′9.47″	57	69°
	2017-05-28	11:03:00	1	29°6′21.04″	117°48′10.34″	56	/
	2017-05-28	11:10:00	1	29°6′21.79″	117°48′14.47″	58	/
	2017-05-28	11:18:00	1	29°6′17.17″	117°48′14.24″	56.2	293°
	2017-05-28	11:28:00	1	29°6′11.92″	117°48′17.93″	55	/
	2017-05-28	16:40:00	1	29°6′16.24″	117°48′16.88″	56	301°
	2017-05-28	16:40:00	1	29°6′14.75″	117°48′17.47′		156°
	2017-05-28	16:55:00	1	29°6′20.67″	117°48′13.06″	58.8	198°
	2017-05-28	16:55:00	1	29°6′20.27″	117°48′13.66″		196°
	2017-05-28	17:15:00	1	29°6′17.24″	117°48′9.47″	57	/
	2017-05-28	17:15:00	1	29°6′19.27″	117°48′15.62″		245°
	2017-05-28	17:30:00	1	29°6′15.02″	117°48′9.47″	55	49°
	2017-05-28	17:30:00	1	29°6′22.02″	117°48′14.79″		/
	2017-05-28	17:45:00	1	29°6′18.34″	117°48′6.8″	57	/
	2017-05-28	17:45:00	1	29°6′22.89″	117°48′12.38″		220°
	2017-05-28	18:00:00	1	29°6′21.79″	117°48′14.47″	58	204°
	2017-05-28	18:00:00	1	29°6′18.39″	117°48′6.68″	57	/
	2017-05-28	18:15:00	1	29°6′16.87″	117°48′11.82″	57	27°
	2017-05-28	18:15:00	1	29°6′15.68″	117°48′3.94″		89°
	2017-05-28	18:30:00	1	29°6′14.69″	117°48′10.7″	56	33°
	2017-05-28	18:30:00	1	29°6′18.57″	117°48′7.43″		/
	2017-05-31	07:10:00	1	29°6′11.92″	117°48′17.93″	55	/
	2017-05-31	07:20:00	1	27°6′13″	117°48′14.7″		311°
	2017-05-31	07:35:00	1	29°6′16.87″	117°48′11.82″	57	6°
	2017-05-31	07:50:00	1	29°6′15.02″	117°48′9.47″	55	45°
	2017-05-31	07:58:00	1	29°6′17.24″	117°48′9.47″	57	73°
	2017-05-31	08:30:00	1	29°6′15.02″	117°48′9.47″	55	37°
	2017-05-31	08:35:00	1	29°6′17.24″	117°48′9.47″	57	65°
	2017-05-31	09:04:00	1	29°6′17.24″	117°48′9.47″	57	70°
	2017-05-31	09:15:00	1	29°6′15.02″	117°48′9.47″	55	36°
	2017-05-31	09:35:00	1	29°6′17.24″	117°48′9.47″	57	/
	2017-05-31	09:40:00	1	29°6′17.97″	117°48′8.06″	58	79°
	2017-05-31	10:15:00	1	29°6′17.24″	117°48′9.47″	57	60°
	2017-05-31	10:20:00	1	29°6′17.97″	117°48′8.06″	58	82°
	2017-05-31	10:45:00	1	29°6′17.24″	117°48′9.47″	57	63°
	2017-05-31	10:50:00	1	29°6′17.97″	117°48′8.06″	58	89°
	2017-05-31	11:15:00	1	29°6′17.24″	117°48′9.47″	57	/
	2017-05-31	11:20:00	1	29°6′17.97″	117°48′8.06″	58	80°
	2017-05-31	11:40:00	1	29°6′16.87″	117°48′11.82″	57	5°
	2017-05-31	11:45:00	1	29°6′21.79″	117°48′14.47″	58	213°
	2017-05-31	16:35:00	1	29°6′11.92″	117°48′17.93″	55	/
	2017-05-31	16:45:00	1	29°6′14.4″	117°48′14.59″	55.2	340°
	2017-05-31	17:02:00	1	29°6′16.87″	117°48′11.82″	57	18°
	2017-05-31	17:12:00	1	29°6′21.79″	117°48′14.47″	58	221°
	2017-05-31	17:20:00	1	29°6′21.04″	117°48′10.34″	56	/
	2017-05-31	17:28:00	1	29°6′18.34″	117°48′6.8″	57	/
	2017-05-31	17:40:00	1	29°6′18.34″	117°48′6.8″	57	/
	2017-05-31	17:46:00	1	29°6′15.02″	117°48′9.47″	55	/
	2017-05-31	18:04:00	1	29°6′14.69″	117°48′10.7″	56	25°
	2017-05-31	18:10:00	1	29°6′16.87″	117°48′11.82″	57	341°
	2017-05-31	18:25:00	1	29°6′21.79″	117°48′14.47″	58	227°
	2017-06-02	08:20:00	1	29°6′17.24″	117°48′9.47″	57	77°
	2017-06-02	08:35:00	1	29°6′15.02″	117°48′9.47″	55	43°
	2017-06-02	08:53:00	1	29°6′21.79″	117°48′14.47″	58	213°
	2017-06-02	09:03:00	1	29°6′21.04″	117°48′10.34″	56	/
	2017-06-02	09:08:00	1	29°6′18.34″	117°48′6.8″	57	/
	2017-06-02	09:34:00	1	29°6′17.24″	117°48′9.47″	57	/
	2017-06-02	09:37:00	1	29°6′15.02″	117°48′9.47″	55	43°
	2017-06-02	09:42:00	1	29°6′16.87″	117°48′11.82″	57	30°
	2017-06-02	10:05:00	1	29°6′17.97″	117°48′8.06″	58	97°
	2017-06-02	10:10:00	1	29°6′17.24″	117°48′9.47″	57	73°
	2017-06-02	10:34:00	1	29°6′15.02″	117°48′9.47″	55	46°
	2017-06-02	10:37:00	1	29°6′17.24″	117°48′9.47″	57	/
	2017-06-02	11:05:00	1	29°6′21.04″	117°48′10.34″	56	/
	2017-06-02	11:10:00	1	29°6′21.79″	117°48′14.47″	58	199°
	2017-06-02	11:37:00	1	29°6′19.4″	117°48′11.3″	50	156°
	2017-06-02	11:45:00	1	29°6′21.79″	117°48′14.47″	58	213°
	2017-06-02	16:30:00	1	29°6′11.92″	117°48′17.93″	55	/
	2017-06-02	16:40:00	1	29°6′18.57″	117°48′18.02″	51.6	/
	2017-06-02	16:48:00	1	29°6′21.79″	117°48′14.47″	58	/
	2017-06-02	17:08:00	1	29°6′17.24″	117°48′9.47″	57	78°
	2017-06-02	17:13:00	1	29°6′15.02″	117°48′9.47″	55	49°
	2017-06-02	17:40:00	1	29°6′17.24″	117°48′9.47″	57	77°
	2017-06-02	17:45:00	1	29°6′16.87″	117°48′11.82″	57	25°
	2017-06-02	18:10:00	1	29°6′21.04″	117°48′10.34″	56	/
	2017-06-02	18:30:00	1	29°6′17.24″	117°48′9.47″	57	77°
	2017-06-02	18:40:00	1	29°6′16.87″	117°48′11.82″	57	23°
	2017-06-02	18:50:00	1	29°6′21.79″	117°48′14.47″	58	211°
	2017-06-02	08:05:00	1	29°06′18.39″	117°48′11.09″	54.4	83°
	2017-06-02	08:35:00	1	29°06′17.61″	117°48′13.62″	49.4	301°
	2017-06-02	09:05:00	1	29°06′17.4″	117°48′12.7″	49	3°
	2017-06-02	09:35:00	1	29°06′19.94″	117°48′13.97″	54	250°
	2017-06-02	10:05:00	1	29°06′19.90″	117°48′13.24″	46.7	174°
	2017-06-02	10:35:00	1	29°06′18.69″	117°48′10.98″	50	99°
	2017-06-02	11:05:00	1	29°06′18.52″	117°48′11.00″	52.2	103°
	2017-06-02	11:35:00	1	29°06′17.87″	117°48′10.10″	48.7	62°
	2017-06-02	16:40:00	1	29°06′15.4″	117°48′18.8″	52	/
	2017-06-02	17:10:00	1	29°06′17.42″	117°48′12.59″	48.7	325°
	2017-06-02	17:40:00	1	29°06′19.68″	117°48′13.68″	45.1	253°
	2017-06-02	18:10:00	1	29°06′21.05″	117°48′14.91″	52.4	235°
	2017-06-02	18:40:00	1	29°06′17.89″	117°48′09.41″	50.4	/
	2017-06-03	06:50:00	1	29°6′17.24″	117°48′9.47″	57	68°
	2017-06-03	07:20:00	1	29°6′17.24″	117°48′9.47″	57	78°
	2017-06-03	07:25:00	1	29°6′15.02″	117°48′9.47″	55	41°
	2017-06-03	07:50:00	1	29°6′14.69″	117°48′10.7″	56	32°
	2017-06-03	07:55:00	1	29°6′15.02″	117°48′9.47″	55	50°
	2017-06-03	08:20:00	1	29°6′17.24″	117°48′9.47″	57	71°
	2017-06-03	08:23:00	1	29°6′15.02″	117°48′9.47″	55	56°
	2017-06-03	08:50:00	1	29°6′14.69″	117°48′10.7″	56	30°
	2017-06-03	08:57:00	1	29°6′15.02″	117°48′9.47″	55	46°
	2017-06-03	09:20:00	1	29°6′15.02″	117°48′9.47″	55	45°
	2017-06-03	09:27:00	1	29°6′17.24″	117°48′9.47″	57	66°
	2017-06-03	09:50:00	1	29°6′17.24″	117°48′9.47″	57	70°
	2017-06-03	09:55:00	1	29°6′15.02″	117°48′9.47″	55	40°
	2017-06-03	10:20:00	1	29°6′14.69″	117°48′10.7″	56	30°
	2017-06-03	10:27:00	1	29°6′16.87″	117°48′11.82″	57	28°
	2017-06-03	10:50:00	1	29°6′17.24″	117°48′9.47″	57	70°
	2017-06-03	10:54:00	1	29°6′15.02″	117°48′9.47″	55	40°
	2017-06-03	11:20:00	1	29°6′14.69″	117°48′10.7″	56	33°
	2017-06-03	11:25:00	1	29°6′16.87″	117°48′11.82″	57	30°
	2017-06-03	11:50:00	1	29°6′17.97″	117°48′8.06″	58	89°
	2017-06-03	11:58:00	1	29°6′21.79″	117°48′14.47″	58	224°
	2017-06-03	16:20:00	1	27°6′19.08″	117°48′17.99″	53.7	273°
	2017-06-03	16:25:00	1	29°6′21.79″	117°48′14.47″	58	217°
	2017-06-03	16:55:00	1	29°6′21.04″	117°48′10.34″	56	150°
	2017-06-03	17:00:00	1	29°6′18.34″	117°48′6.8″	57	/
	2017-06-03	17:20:00	1	29°6′17.97″	117°48′8.06″	58	80°
	2017-06-03	17:25:00	1	29°6′17.24″	117°48′9.47″	57	70°
	2017-06-03	17:50:00	1	29°6′17.24″	117°48′9.47″	57	70°
	2017-06-03	17:55:00	1	29°6′15.02″	117°48′9.47″	55	40°
	2017-06-03	18:20:00	1	29°6′14.69″	117°48′10.7″	56	25°
	2017-06-03	18:25:00	1	29°6′16.87″	117°48′11.82″	57	21°
	2017-06-03	18:50:00	1	29°6′15.02″	117°48′9.47″	55	47°
	2017-06-03	18:52:00	1	29°6′17.24″	117°48′9.47″	57	68°
	2017-06-03	06:50:00	1	29°06′14.81″	117°48′09.48″	53.2	24°
	2017-06-03	07:20:00	1	29°06′18.13″	117°48′09.74″	54.7	98°
	2017-06-03	07:50:00	1	29°06′19.02″	117°48′13.79″	51.3	254°
	2017-06-03	08:20:00	1	29°06′20.72″	117°48′14.23″	53	237°
	2017-06-03	08:50:00	1	29°06′22.00″	117°48′14.55″	52.2	/
	2017-06-03	09:20:00	1	29°06′20.85″	117°48′14.79″	52.9	248°
	2017-06-03	09:50:00	1	29°06′20.77″	117°48′14.93″	47.5	251°
	2017-06-03	10:20:00	1	29°06′17.68″	117°48′12.70″	47.9	334°
	2017-06-03	10:50:00	1	29°06′19.96″	117°48′13.95″	54.1	262°
	2017-06-03	11:20:00	1	29°06′19.99″	117°48′14.02″	49.8	248°
	2017-06-03	11:50:00	1	29°06′15.34″	117°48′09.28″	47.3	/
	2017-06-03	16:20:00	1	29°06′16.07″	117°48′18.49″	54	/
	2017-06-03	16:50:00	1	29°06′17.23″	117°48′12.60″	50	345°
	2017-06-03	17:20:00	1	29°06′19.12″	117°48′13.53″	52	249°
	2017-06-03	17:50:00	1	29°06′21.56″	117°48′14.95″	47.5	232°
	2017-06-03	18:20:00	1	29°06′21.97″	117°48′14.85″	49.8	/
	2017-06-03	18:50:00	1	29°06′18.13″	117°48′09.87″	51.2	84°
	2017-06-04	06:50:00	1	29°6′19.08″	117°48′17.99″	53.7	272°
	2017-06-04	06:57:00	1	29°6′21.79″	117°48′14.47″	58	215°
	2017-06-04	07:20:00	1	29°6′21.04″	117°48′10.34″	56	/
	2017-06-04	07:28:00	1	29°6′18.34″	117°48′6.8″	57	/
	2017-06-04	07:50:00	1	29°6′15.02″	117°48′9.47″	55	37°
	2017-06-04	07:57:00	1	29°6′17.24″	117°48′9.47″	57	67°
	2017-06-04	08:20:00	1	29°6′17.24″	117°48′9.47″	57	66°
	2017-06-04	08:25:00	1	29°6′17.97″	117°48′8.06″	58	83°
	2017-06-04	08:50:00	1	29°6′17.24″	117°48′9.47″	57	67°
	2017-06-04	08:55:00	1	29°6′17.97″	117°48′8.06″	58	81°
	2017-06-04	09:20:00	1	29°6′17.24″	117°48′9.47″	57	73°
	2017-06-04	09:25:00	1	29°6′16.87″	117°48′11.82″	57	18°
	2017-06-04	09:55:00	1	29°6′17.24″	117°48′9.47″	57	65°
	2017-06-04	09:58:00	1	29°6′16.87″	117°48′11.82″	57	18°
	2017-06-04	10:20:00	1	29°6′17.24″	117°48′9.47″	57	68°
	2017-06-04	10:50:00	1	29°6′17.24″	117°48′9.47″	57	67°
	2017-06-04	11:20:00	1	29°6′21.79″	117°48′14.47″	58	229°
	2017-06-04	11:54:00	1	29°6′21.04″	117°48′10.34″	56	/
	2017-06-04	15:30:00	1	29°6′19.08″	117°48′17.99″	53.7	275°
	2017-06-04	15:40:00	1	29°6′21.79″	117°48′14.47″	58	220°
	2017-06-04	16:00:00	1	29°6′21.04″	117°48′10.34″	56	/
	2017-06-04	16:30:00	1	29°6′21.04″	117°48′10.34″	56	/
	2017-06-04	17:00:00	1	29°6′17.24″	117°48′9.47″	57	66°
	2017-06-04	17:08:00	1	29°6′15.02″	117°48′9.47″	55	40°
	2017-06-04	17:30:00	1	29°6′14.69″	117°48′10.7″	56	/
	2017-06-04	17:36:00	1	29°6′17.24″	117°48′9.47″	57	/
	2017-06-04	18:00:00	1	29°6′14.69″	117°48′10.7″	56	23°
	2017-06-04	18:10:00	1	29°6′21.04″	117°48′10.34″	56	/
	2017-06-04	18:30:00	1	29°6′21.04″	117°48′10.34″	56	/
	2017-06-04	18:35:00	1	29°6′21.79″	117°48′14.47″	58	/
	2017-06-04	06:50:00	1	29°06′16.11″	117°48′18.49″	50.1	/
	2017-06-04	07:20:00	1	29°06′18.17″	117°48′10.43″	45.6	71°
	2017-06-04	07:50:00	1	29°06′18.53″	117°48′09.31″	55.2	/
	2017-06-04	08:20:00	1	29°06′19.90″	117°48′14.03″	54.8	243°
	2017-06-04	08:50:00	1	29°06′21.77″	117°48′14.49″	51.8	/
	2017-06-04	09:20:00	1	29°06′21.57″	117°48′14.63″	52.4	231°
	2017-06-04	09:50:00	1	29°06′21.72″	117°48′14.40″	55.5	125°
	2017-06-04	10:20:00	1	29°06′21.67″	117°48′14.53″	52.9	220°
	2017-06-04	10:50:00	1	29°06′17.18″	117°48′12.65″	51.4	343°
	2017-06-04	11:20:00	1	29°06′17.08″	117°48′12.83″	49.4	344°
	2017-06-04	11:50:00	1	29°06′21.36″	117°48′14.29″	47.4	225°
	2017-06-04	15:30:00	1	29°06′16.08″	117°48′18.54″	48.2	108°
	2017-06-04	16:00:00	1	29°06′21.91″	117°48′14.47″	53.9	/
	2017-06-04	16:30:00	1	29°06′21.56″	117°48′14.61″	55.2	236°
	2017-06-04	17:00:00	1	29°06′16.98″	117°48′12.14″	53.2	21°
	2017-06-04	17:30:00	1	29°06′17.30″	117°48′12.78″	50.7	348°
	2017-06-04	18:00:00	1	29°06′17.49″	117°48′13.54″	50.4	323°
	2017-06-04	18:30:00	1	29°06′17.91″	117°48′09.29″	49.7	83°
	2017-06-05	07:20:00	1	29°6′17.24″	117°48′9.47″	57	70°
	2017-06-05	07:26:00	1	29°6′17.97″	117°48′8.06″	58	88°
	2017-06-05	07:50:00	1	29°6′17.24″	117°48′9.47″	57	68°
	2017-06-05	07:55:00	1	29°6′19.51″	117°48′11.29″	57.6	155°
	2017-06-05	08:20:00	1	29°6′17.24″	117°48′9.47″	57	73°
	2017-06-05	08:25:00	1	29°6′17.97″	117°48′8.06″	58	93°
	2017-06-05	08:43:00	1	29°6′19.76″	117°48′8.42″	57.8	125°
	2017-06-05	08:47:00	1	29°6′21.04″	117°48′10.34″	56	/
	2017-06-05	08:51:00	1	29°6′21.79″	117°48′14.47″	58	223°
	2017-06-05	07:20:00	1	29°06′13.12″	117°48′18.21″		234°
	2017-06-05	07:50:00	1	29°06′22.42″	117°48′14.92″		158°
	2017-06-05	08:20:00	1	29°06′21.44″	117°48′14.79″	47.4	183°
	2017-06-05	08:50:00	1	29°06′21.61″	117°48′14.58″	52.4	294°
	2017-06-05	09:20:00	1	29°06′21.68″	117°48′14.61″	52.9	203°
	2017-06-05	09:25:00	1	29°06′17.30″	117°48′12.83″	50.7	326°
	2017-06-05	09:50:00	1	29°06′17.01″	117°48′12.43″		312°
	2017-06-05	09:58:00	1	29°06′22.52″	117°48′17.18″		143°
	2017-06-05	10:20:00	1	29°06′22.29″	117°48′14.44″	52.2	/
	2017-06-05	10:27:00	1	29°06′20.29″	117°48′14.57″	49.8	272°
	2017-06-05	10:50:00	1	29°06′22.81″	117°48′16.54″		210°
	2017-06-05	10:55:00	1	29°06′23.71″	117°48′18.53″		218°
	2017-06-05	11:20:00	1	29°06′22.79″	117°48′16.68″		186°
	2017-06-05	11:28:00	1	29°06′21.78″	117°48′17.24″		230°
	2017-06-05	16:00:00	1	29°06′21.63″	117°48′14.67″	52.4	217°
	2017-06-05	16:08:00	1	29°06′20.87″	117°48′14.64″	52.9	214°
	2017-06-05	16:30:00	1	29°06′21.90″	117°48′14.33″		223°
	2017-06-05	16:37:00	1	29°06′17.40″	117°48′12.86″	49	318°
	2017-06-05	17:00:00	1	29°06′17.20″	117°48′12.41″	51.4	15°
	2017-06-05	17:05:00	1	29°06′18.22″	117°48′10.59″	45.6	64°
	2017-06-05	17:30:00	1	29°06′17.86″	117°48′10.14″	47.9	9°
	2017-06-05	17:36:00	1	29°06′19.84″	117°48′10.43″		118°
	2017-06-05	18:00:00	1	29°06′20.47″	117°48′09.95″		130°
	2017-06-05	18:05:00	1	29°06′22.35″	117°48′11.98″		190°
	2017-06-05	18:30:00	1	29°06′21.72″	117°48′14.49″	55.5	230°
	2017-06-05	18:35:00	1	29°06′21.27″	117°48′14.68″	47.4	241°
	2017-06-10	07:15:00	1	29°6′11.92″	117°48′17.93″	55	/
	2017-06-10	07:20:00	1	29°6′10.79″	117°48′18.01″	53.1	/
	2017-06-10	07:38:00	1	29°6′5.13″	117°48′8.48″	58.2	/
	2017-06-10	07:42:00	1	29°6′4.51″	117°48′6.54″	56.9	/
	2017-06-10	07:57:00	1	29°6′8.64″	117°47′59.33″	56.1	/
	2017-06-10	08:00:00	1	29°6′10.39″	117°48′0.2″	53.3	/
	2017-06-10	08:10:00	1	29°6′18.34″	117°48′6.8″	57	/
	2017-06-10	08:13:00	1	29°6′21.04″	117°48′10.34″	56	/

## Sheet: 20172 original data
				receive signal site coordinate
	date	time	No.	N	E	elevation/m	angle of signal direction
	2017-05-09	16:43:00	2	29°6′17.06″	117°48′9.5″		64°
	2017-05-09	16:52:00	2	29°6′15.84″	117°48′10.37″		24°
	2017-05-09	17:27:00	2	29°6′18.81″	117°48′8.5″		105°
	2017-05-09	17:34:00	2	29°6′22.02″	117°48′11.29″		180°
	2017-05-09	18:26:00	2	29°6′19.23″	117°48′9.99″		129°
	2017-05-09	18:31:00	2	29°6′18.52″	117°48′10.13″		/
	2017-05-09	18:48:00	2	29°6′21.89″	117°48′14.24″		/
	2017-05-10	06:52:00	2	29°6′21.89″	117°48′14.24″		/
	2017-05-10	06:58:00	2	29°6′19.1″	117°48′13.69″		/
	2017-05-10	08:51:00	2	29°6′18.94″	117°48′9.9″		110°
	2017-05-10	08:55:00	2	29°6′18.7″	117°48′9.5″		/
	2017-05-10	09:07:00	2	29°6′14.73″	117°48′9.68″		/
	2017-05-10	09:35:00	2	29°6′16.44″	117°48′4.64″		/
	2017-05-10	09:50:00	2	29°6′19.31″	117°48′7.79″		/
	2017-05-10	11:48:00	2				29°6'18.37"，117°48'11.99"
	2017-05-10	14:19:00	2				/
	2017-05-10	15:20:00	2				29°6'18.37"，117°48'11.99"
	2017-05-10	15:36:00	2				29°6'18.37"，117°48'11.99"
	2017-05-10	16:16:00	2	29°6′17.1″	117°48′8.5″		70°-80°
	2017-05-10	16:24:00	2	29°6′14.98″	117°48′9.49″	55	/
	2017-05-10	17:02:00	2	29°6′17.52″	117°48′5.62″	57	/
	2017-05-10	17:11:00	2	29°6′20.14″	117°48′8.59″		/
	2017-05-10	17:20:00	2	29°6′20.96″	117°48′11.39″		/
	2017-05-10	18:00:00	2	29°6′18.66″	117°48′11.24″		/
	2017-05-10	18:05:00	2	29°6′17.47″	117°48′9.58″	57	/
	2017-05-10	18:30:00	2				29°6'18.37"，117°48'11.99"
	2017-05-11	06:50:00	2				29°6'18.37"，117°48'11.99"
	2017-05-11	09:34:00	2	29°6′14.35″	117°48′24.05″		/
	2017-05-11	09:39:00	2	29°6′14.02″	117°48′21.49″		82°
	2017-05-11	10:24:00	2	29°6′15.56″	117°48′3.85″		/
	2017-05-11	10:28:00	2	29°6′18.95″	117°48′7.4″		/
	2017-05-11	11:25:00	2				29°6'18.37"，117°48'11.99"
	2017-05-11	14:35:00	2				29°6'18.37"，117°48'11.99"
	2017-05-11	16:16:00	2				29°6'18.37"，117°48'11.99"
	2017-05-11	16:30:00	2	29°6′23.11″	117°48′12.97″		/
	2017-05-11	17:09:00	2	29°6′15.94″	117°48′4.04″		/
	2017-05-11	18:15:00	2	29°6′18.6″	117°48′11.36″		124°
	2017-05-11	18:25:00	2	29°6′19.69″	117°48′13.85″		229°
	2017-05-12	08:59:00	2	29°6′15.02″	117°48′9.47″	55	/
	2017-05-12	09:10:00	2	29°6′17.24″	117°48′9.47″	55	无信号
	2017-05-12	09:43:00	2	29°6′20.48″	117°48′13.87″		/
	2017-05-12	09:50:00	2	29°6′21.29″	117°48′10.57″		/
	2017-05-12	14:15:00	2	29°6′17.24″	117°48′9.47″	55	/
	2017-05-12	14:20:00	2	29°6′15.02″	117°48′9.47″	55	/
	2017-05-12	14:56:00	2	29°6′17.24″	117°48′9.47″	55	/
	2017-05-12	15:00:00	2	29°6′17.88″	117°48′8″	55	/
	2017-05-12	15:40:00	2	29°6′15.02″	117°48′9.47″	55	/
	2017-05-12	15:45:00	2	29°6′17.24″	117°48′9.47″	55	/
	2017-05-12	16:30:00	2	29°6′17.24″	117°48′9.47″	55	/
	2017-05-12	16:40:00	2	29°6′15.02″	117°48′9.47″	55	/
	2017-05-12	17:15:00	2	29°6′20.96″	117°48′10.31″		/
	2017-05-12	17:20:00	2	29°6′18.57″	117°48′7″		/
	2017-05-12	17:50:00	2	29°6′15.02″	117°48′9.47″	55	/
	2017-05-12	17:55:00	2	29°6′17.24″	117°48′9.47″	55	/
	2017-05-13	07:20:00	2	29°6′17.24″	117°48′9.47″	55	/
	2017-05-13	07:25:00	2	29°6′15.02″	117°48′9.47″	55	/
	2017-05-13	08:00:00	2	29°6′15.02″	117°48′9.47″	55	/
	2017-05-13	08:01:00	2	29°6′17.24″	117°48′9.47″	55	/
	2017-05-13	09:04:00	2	29°6′21.04″	117°48′10.34″	56	桂花林中
	2017-05-13	09:10:00	2	29°6′18.34″	117°48′6.8″	57	/
	2017-05-13	09:40:00	2	29°6′18.34″	117°48′6.8″	57	桂花林中
	2017-05-13	09:45:00	2	29°6′21.04″	117°48′10.34″	56	桂花林中
	2017-05-13	10:27:00	2	29°6′17.97″	117°48′8.06″	58	/
	2017-05-13	10:35:00	2	29°6′17.24″	117°48′9.47″	57	62°
	2017-05-13	10:40:00	2	29°6′15.02″	117°48′9.47″	55	/
	2017-05-13	11:15:00	2	29°6′18.34″	117°48′6.8″	57	/
	2017-05-13	11:20:00	2	29°6′21.04″	117°48′10.34″	56	153°
	2017-05-13	14:50:00	2				29°6'18.37"，117°48'11.99"
	2017-05-13	15:50:00	2				29°6'18.37"，117°48'11.99"
	2017-05-13	16:40:00	2	29°6′15.02″	117°48′9.47″	55	/
	2017-05-13	16:50:00	2	29°6′17.24″	117°48′9.47″	57	/
	2017-05-13	18:05:00	2	29°6′17.24″	117°48′9.47″	57	/
	2017-05-13	18:10:00	2	29°6′15.02″	117°48′9.47″	55	/
	2017-05-14	17:05:00	2	29°6′17.97″	117°48′8.06″	58	84°
	2017-05-14	17:10:00	2	29°6′17.24″	117°48′9.47″	57	68°
	2017-05-14	17:45:00	2	29°6′21.04″	117°48′10.34″	56	156°
	2017-05-14	17:50:00	2	29°6′18.34″	117°48′6.8″	57	/
	2017-05-14	18:20:00	2	29°6′15.02″	117°48′9.47″	55	/
	2017-05-14	18:25:00	2	29°6′17.24″	117°48′9.47″	57	/
	2017-05-15	16:20:00	2	29°6′19.74″	117°48′13.33″		233°
	2017-05-15	16:30:00	2	29°6′17.97″	117°48′8.06″	58	82°
	2017-05-15	17:00:00	2	29°6′17.24″	117°48′9.47″	57	70°
	2017-05-15	17:05:00	2	29°6′15.02″	117°48′9.47″	55	34°
	2017-05-15	17:35:00	2	29°6′17.77″	117°48′11.42″	57	55°
	2017-05-15	17:45:00	2	29°6′17.24″	117°48′9.47″	57	70°
	2017-05-15	17:52:00	2	29°6′15.02″	117°48′9.47″	55	38°
	2017-05-16	08:05:00	2	29°6′18.34″	117°48′6.8″	57	/
	2017-05-16	08:15:00	2	29°6′21.04″	117°48′10.34″	56	/
	2017-05-16	08:30:00	2				29°6'18.37"，117°48'11.99"
	2017-05-16	09:00:00	2	29°6′17.24″	117°48′9.47″	57	73°
	2017-05-16	09:05:00	2	29°6′15.02″	117°48′9.47″	55	/
	2017-05-16	16:30:00	2	29°6′21.04″	117°48′10.34″	56	/
	2017-05-16	16:35:00	2	29°6′18.34″	117°48′6.8″	57	/
	2017-05-16	17:12:00	2	29°6′17.24″	117°48′9.47″	57	/
	2017-05-16	17:15:00	2	29°6′15.02″	117°48′9.47″	55	/
	2017-05-16	16:00:00	2				29°6'18.37"，117°48'11.99"
	2017-05-18	15:15:00	2	29°6′13.2″	117°48′16.22″	56.1	/
	2017-05-18	15:25:00	2	29°6′13.33″	117°48′12.59″	54.8	/
	2017-05-18	15:30:00	2	29°6′15.02″	117°48′9.47″	55	/
	2017-05-18	16:10:00	2	29°6′15.02″	117°48′9.47″	55	/
	2017-05-18	16:15:00	2	29°6′17.24″	117°48′9.47″	57	/
	2017-05-18	16:55:00	2	29°6′17.24″	117°48′9.47″	57	/
	2017-05-18	17:00:00	2	29°6′15.02″	117°48′9.47″	55	/
	2017-05-18	17:50:00	2	29°6′17.24″	117°48′9.47″	57	/
	2017-05-18	17:55:00	2	29°6′17.97″	117°48′8.06″	58	/
	2017-05-18	18:25:00	2	29°6′18.34″	117°48′6.8″	57	/
	2017-05-18	18:30:00	2	29°6′21.04″	117°48′10.34″	56	/
	2017-05-18	18:40:00	2	29°6′19.31″	117°48′11.32″		/
	2017-05-18	18:50:00	2	29°6′19.31″	117°48′11.32″		0°
	2017-05-18	18:55:00	2	29°6′19.67″	117°48′13.36″		218°
	2017-05-19	10:16:00	2	29°6′18.09″	117°48′9.98″		89°
	2017-05-19	10:20:00	2	29°6′17.24″	117°48′9.47″	57	70°
	2017-05-19	10:55:00	2	29°6′17.77″	117°48′11.42″	57	40°
	2017-05-19	11:00:00	2	29°6′17.24″	117°48′9.47″	57	63°
	2017-05-19	11:23:00	2	29°6′17.24″	117°48′9.47″	57	/
	2017-05-19	11:34:00	2	29°6′15.02″	117°48′9.47″	55	/
	2017-05-19	11:38:00	2	29°6′18.19″	117°48′10.4″	57.1	80°
	2017-05-19	17:05:00	2	29°6′18.19″	117°48′10.4″	57.1	85°
	2017-05-19	17:13:00	2	29°6′17.24″	117°48′9.47″	57	72°
	2017-05-19	17:45:00	2	29°6′17.24″	117°48′9.47″	57	/
	2017-05-19	17:55:00	2	29°6′17.97″	117°48′8.06″	58	/
	2017-05-19	18:30:00	2	29°6′16.87″	117°48′11.82″	57	14°
	2017-05-19	18:36:00	2	29°6′21.79″	117°48′14.47″	58	/
	2017-05-20	15:21:00	2	29°6′14.24″	117°48′23.39″		/
	2017-05-20	15:28:00	2	29°6′13.64″	117°48′19.04″		/
	2017-05-20	15:35:00	2	29°6′16.71″	117°48′16.43″		313°
	2017-05-20	15:48:00	2	29°6′16.87″	117°48′11.82″	57	7°
	2017-05-20	16:18:00	2	29°6′17.24″	117°48′9.47″	57	64°
	2017-05-20	16:25:00	2	29°6′15.02″	117°48′9.47″	55	35°
	2017-05-20	17:05:00	2	29°6′15.02″	117°48′9.47″	55	/
	2017-05-20	17:15:00	2	29°6′17.24″	117°48′9.47″	57	84°
	2017-05-20	17:35:00	2	29°6′18.34″	117°48′6.8″	57	/
	2017-05-20	17:52:00	2	29°6′18.34″	117°48′6.8″	57	/
	2017-05-20	17:57:00	2	29°6′21.04″	117°48′10.34″	56	/
	2017-05-20	18:25:00	2	29°6′15.02″	117°48′9.47″	55	/
	2017-05-20	18:35:00	2	29°6′16.87″	117°48′11.82″	57	23°
	2017-05-20	18:46:00	2	29°6′21.79″	117°48′14.47″	58	/
	2017-05-21	07:32:00	2	29°6′16.87″	117°48′11.82″	57	13°
	2017-05-21	07:40:00	2	29°6′15.02″	117°48′9.47″	55	42°
	2017-05-21	07:45:00	2	29°6′17.24″	117°48′9.47″	57	69°
	2017-05-21	08:18:00	2	29°6′17.24″	117°48′9.47″	57	56°
	2017-05-21	08:23:00	2	29°6′17.97″	117°48′8.06″	58	72°
	2017-05-21	09:00:00	2	29°6′18.34″	117°48′6.8″	57	/
	2017-05-21	09:08:00	2	29°6′21.04″	117°48′10.34″	56	156°
	2017-05-21	09:40:00	2	29°6′17.24″	117°48′9.47″	57	69°
	2017-05-21	09:48:00	2	29°6′15.02″	117°48′9.47″	55	43°
	2017-05-21	10:25:00	2	29°6′16.87″	117°48′11.82″	57	16°
	2017-05-21	10:30:00	2	29°6′14.69″	117°48′10.7″	56	29°
	2017-05-21	10:55:00	2	29°6′14.69″	117°48′10.7″	56	/
	2017-05-21	11:03:00	2	29°6′15.02″	117°48′9.47″	55	42°
	2017-05-21	11:08:00	2	29°6′17.24″	117°48′9.47″	57	58°
	2017-05-21	11:34:00	2	29°6′17.24″	117°48′9.47″	57	60°
	2017-05-21	11:35:00	2	29°6′17.97″	117°48′8.06″	58	75°
	2017-05-21	15:48:00	2	29°6′17.24″	117°48′9.47″	57	/
	2017-05-21	15:53:00	2	29°6′15.02″	117°48′9.47″	55	/
	2017-05-21	16:28:00	2	29°6′15.02″	117°48′9.47″	55	/
	2017-05-21	16:35:00	2	29°6′17.24″	117°48′9.47″	57	68°
	2017-05-21	17:00:00	2	29°6′21.04″	117°48′10.34″	56	/
	2017-05-21	17:08:00	2	29°6′18.34″	117°48′6.8″	57	/
	2017-05-21	17:15:00	2	29°6′17.97″	117°48′8.06″	58	/
	2017-05-21	17:20:00	2	29°6′15.02″	117°48′9.47″	55	/
	2017-05-21	17:50:00	2	29°6′15.02″	117°48′9.47″	55	/
	2017-05-21	17:55:00	2	29°6′17.24″	117°48′9.47″	57	/
	2017-05-21	18:00:00	2	29°6′17.97″	117°48′8.06″	58	/
	2017-05-21	18:22:00	2	29°6′17.97″	117°48′8.06″	58	/
	2017-05-21	18:28:00	2	29°6′18.34″	117°48′6.8″	57	/
	2017-05-21	18:35:00	2	29°6′21.04″	117°48′10.34″	56	/
	2017-05-22	15:50:00	2	29°6′17.97″	117°48′8.06″	58	/
	2017-05-22	16:04:00	2	29°6′17.24″	117°48′9.47″	57	/
	2017-05-22	16:33:00	2	29°6′15.02″	117°48′9.47″	55	/
	2017-05-22	16:35:00	2	29°6′14.69″	117°48′10.7″	56	/
	2017-05-22	16:43:00	2	29°6′16.87″	117°48′11.82″	57	/
	2017-05-22	16:52:00	2	29°6′17.24″	117°48′9.47″	57	/
	2017-05-22	17:26:00	2	29°6′17.97″	117°48′8.06″	58	/
	2017-05-22	17:30:00	2	29°6′18.34″	117°48′6.8″	57	/
	2017-05-22	17:35:00	2	29°6′21.04″	117°48′10.34″	56	/
	2017-05-22	17:56:00	2	29°6′21.04″	117°48′10.34″	56	/
	2017-05-22	18:05:00	2	29°6′18.34″	117°48′6.8″	57	/
	2017-05-22	18:10:00	2	29°6′17.97″	117°48′8.06″	58	/
	2017-05-22	18:15:00	2	29°6′17.24″	117°48′9.47″	57	/
	2017-05-22	18:35:00	2	29°6′16.87″	117°48′11.82″	57	18°
	2017-05-22	18:40:00	2	29°6′21.79″	117°48′14.47″	58	/
	2017-05-26	08:20:00	2	29°6′17.97″	117°48′8.06″	58	/
	2017-05-26	08:30:00	2	29°6′15.02″	117°48′9.47″	55	/
	2017-05-26	08:50:00	2	29°6′18.34″	117°48′6.8″	57	/
	2017-05-26	08:55:00	2	29°6′17.97″	117°48′8.06″	58	/
	2017-05-26	09:20:00	2	29°6′17.24″	117°48′9.47″	57	/
	2017-05-26	09:25:00	2	29°6′15.02″	117°48′9.47″	55	/
	2017-05-26	09:50:00	2	29°6′15.02″	117°48′9.47″	55	38°
	2017-05-26	09:53:00	2	29°6′17.24″	117°48′9.47″	57	/
	2017-05-26	10:20:00	2	29°6′21.04″	117°48′10.34″	56	92°
	2017-05-26	10:25:00	2	29°6′21.88″	117°48′11.61″		155°
	2017-05-26	10:50:00	2	29°6′21.79″	117°48′14.47″	58	186°
	2017-05-26	10:56:00	2	29°6′16.87″	117°48′11.82″	57	15°
	2017-05-26	11:20:00	2	29°6′17.24″	117°48′9.47″	57	/
	2017-05-26	11:25:00	2	29°6′15.02″	117°48′9.47″	55	/
	2017-05-26	11:45:00	2	29°6′15.02″	117°48′9.47″	55	/
	2017-05-26	11:48:00	2	29°6′17.24″	117°48′9.47″	57	/
	2017-05-26	16:00:00	2	29°6′16.87″	117°48′11.82″	57	17°
	2017-05-26	16:06:00	2	29°6′21.79″	117°48′14.47″	58	/
	2017-05-26	16:30:00	2	29°6′15.02″	117°48′9.47″	55	/
	2017-05-26	16:35:00	2	29°6′17.97″	117°48′8.06″	58	/
	2017-05-26	17:00:00	2	29°6′17.24″	117°48′9.47″	57	/
	2017-05-26	17:05:00	2	29°6′15.02″	117°48′9.47″	55	/
	2017-05-26	17:34:00	2	29°6′18.34″	117°48′6.8″	57	/
	2017-05-26	17:40:00	2	29°6′17.97″	117°48′8.06″	58	/
	2017-05-26	18:00:00	2	29°6′15.02″	117°48′9.47″	55	/
	2017-05-26	18:08:00	2	29°6′14.69″	117°48′10.7″	56	/
	2017-05-26	18:28:00	2	29°6′14.69″	117°48′10.7″	56	/
	2017-05-26	18:30:00	2	29°6′16.87″	117°48′11.82″	57	17°
	2017-05-26	18:55:00	2	29°6′17.24″	117°48′9.47″	57	/
	2017-05-26	19:00:00	2	29°6′21.79″	117°48′14.47″	58	221°
	2017-05-26	08:20:00	2	29°06′20.9″	117°48′14.5″	52.9	/
	2017-05-26	08:50:00	2	29°06′19.1″	117°48′17.1″		125°
	2017-05-26	09:20:00	2	29°06′9.9″	117°48′15.4″		99°
	2017-05-26	09:50:00	2	29°06′10.3″	117°48′10.9″		/
	2017-05-26	10:20:00	2	29°06′14.5″	117°48′9.0″		/
	2017-05-26	10:50:00	2	29°06′15.5″	117°48′3.9″		/
	2017-05-26	11:20:00	2	29°06′21.2″	117°48′10.8″		/
	2017-05-26	11:50:00	2	29°06′12.3″	117°48′18.1″		99°
	2017-05-26	16:00:00	2	29°06′12.8″	117°48′18.2″		69°
	2017-05-26	16:30:00	2	29°06′10.5″	117°48′10.3″		/
	2017-05-26	17:00:00	2	29°06′16.3″	117°48′4.2″		/
	2017-05-26	17:30:00	2	29°06′21.2″	117°48′10.3″		/
	2017-05-26	18:00:00	2	29°06′21.9″	117°48′14.0″		/
	2017-05-26	18:30:00	2	29°06′18.4″	117°48′18.1″		21°
	2017-05-26	19:00:00	2	29°06′12.3″	117°48′12.0″		81°
	2017-05-27	10:00:00	2	29°6′17.97″	117°48′8.06″	58	/
	2017-05-27	10:10:00	2	29°6′18.34″	117°48′6.8″	57	/
	2017-05-27	10:30:00	2	29°6′15.02″	117°48′9.47″	55	/
	2017-05-27	10:38:00	2	29°6′14.69″	117°48′10.7″	56	/
	2017-05-27	10:45:00	2	29°6′21.79″	117°48′14.47″	58	223°
	2017-05-27	11:00:00	2	29°6′21.04″	117°48′10.34″	56	158°
	2017-05-27	11:04:00	2	29°6′18.34″	117°48′6.8″	57	/
	2017-05-27	16:20:00	2	29°6′15.02″	117°48′9.47″	55	/
	2017-05-27	16:30:00	2	29°6′17.24″	117°48′9.47″	57	/
	2017-05-27	16:46:00	2	29°6′17.24″	117°48′9.47″	57	/
	2017-05-27	16:55:00	2	29°6′16.87″	117°48′11.82″	57	/
	2017-05-27	17:20:00	2	29°6′15.02″	117°48′9.47″	55	/
	2017-05-27	10:00:00	2	29°06′16.0″	117°48′9.0″		/
	2017-05-27	10:30:00	2	29°06′13.1″	117°48′12.8″		86°
	2017-05-27	11:00:00	2	29°06′15″	117°48′16″		94°
	2017-05-27	11:10:00	2	29°06′20″	117°48′11″		129°
	2017-05-27	16:20:00	2	29°06′19″	117°48′15″	49.8	129°
	2017-05-27	16:50:00	2	29°06′20″	117°48′11″		145°
	2017-05-27	17:20:00	2	29°06′17″	117°48′09″	49.7	129°
	2017-05-27	17:50:00	2	29°06′15″	117°48′09″		84°
	2017-05-27	18:20:00	2	29°06′12″	117°48′12″		82°
	2017-05-27	18:50:00	2	29°06′14″	117°48′16″		71°
	2017-05-28	07:19:00	2	29°6′11.92″	117°48′17.93″	52.6	/
	2017-05-28	07:30:00	2	29°6′9.11″	117°48′16.34″		/
	2017-05-28	07:55:00	2	29°6′7.85″	117°48′12.59″	55.1	/
	2017-05-28	08:10:00	2	29°6′10.25″	117°48′15.03″	51.5	/
	2017-05-28	08:25:00	2	29°6′8.69″	117°48′10.42″	52.7	/
	2017-05-28	08:35:00	2	29°6′10.87″	117°48′13.16″	51.1	/
	2017-05-28	08:50:00	2	29°6′13.28″	117°48′12.67″	52.7	/
	2017-05-28	09:03:00	2	29°6′15.02″	117°48′9.47″	55	/
	2017-05-28	09:11:00	2	29°6′16.87″	117°48′11.82″	57	/
	2017-05-28	10:18:00	2	29°6′17.24″	117°48′9.47″	57	/
	2017-05-28	10:25:00	2	29°6′15.02″	117°48′9.47″	55	46°
	2017-05-28	10:55:00	2	29°6′17.24″	117°48′9.47″	57	/
	2017-05-28	11:03:00	2	29°6′21.04″	117°48′10.34″	56	/
	2017-05-28	11:10:00	2	29°6′21.79″	117°48′14.47″	58	192°
	2017-05-28	11:18:00	2	29°6′17.17″	117°48′14.24″	56.2	/
	2017-05-28	11:28:00	2	29°6′11.92″	117°48′17.93″	55	/
	2017-05-28	16:40:00	2	29°6′16.24″	117°48′16.88″	56	/
	2017-05-28	16:40:00	2	29°6′14.75″	117°48′17.47′		227°
	2017-05-28	16:55:00	2	29°6′20.67″	117°48′13.06″	58.8	/
	2017-05-28	16:55:00	2	29°6′20.27″	117°48′13.66″		219°
	2017-05-28	17:15:00	2	29°6′17.24″	117°48′9.47″	57	/
	2017-05-28	17:15:00	2	29°6′19.27″	117°48′15.62″		242°
	2017-05-28	17:30:00	2	29°6′15.02″	117°48′9.47″	55	/
	2017-05-28	17:30:00	2	29°6′22.02″	117°48′14.79″		254°
	2017-05-28	17:45:00	2	29°6′18.34″	117°48′6.8″	57	/
	2017-05-28	17:45:00	2	29°6′22.89″	117°48′12.38″		273°
	2017-05-28	18:00:00	2	29°6′21.79″	117°48′14.47″	58	/
	2017-05-28	18:00:00	2	29°6′18.39″	117°48′6.68″	57	/
	2017-05-28	18:15:00	2	29°6′16.87″	117°48′11.82″	57	/
	2017-05-28	18:15:00	2	29°6′15.68″	117°48′3.94″		68°
	2017-05-28	18:30:00	2	29°6′14.69″	117°48′10.7″	56	/
	2017-05-28	18:30:00	2	29°6′18.57″	117°48′7.43″		/
	2017-05-31	07:10:00	2	29°6′11.92″	117°48′17.93″	55	/
	2017-05-31	07:20:00	2	27°6′13″	117°48′14.7″		/
	2017-05-31	07:35:00	2	29°6′16.87″	117°48′11.82″	57	14°
	2017-05-31	07:50:00	2	29°6′15.02″	117°48′9.47″	55	/
	2017-05-31	07:58:00	2	29°6′17.24″	117°48′9.47″	57	/
	2017-05-31	08:30:00	2	29°6′15.02″	117°48′9.47″	55	/
	2017-05-31	08:35:00	2	29°6′17.24″	117°48′9.47″	57	/
	2017-05-31	09:04:00	2	29°6′17.24″	117°48′9.47″	57	/
	2017-05-31	09:15:00	2	29°6′15.02″	117°48′9.47″	55	/
	2017-05-31	09:35:00	2	29°6′17.24″	117°48′9.47″	57	/
	2017-05-31	09:40:00	2	29°6′17.97″	117°48′8.06″	58	60°
	2017-05-31	10:15:00	2	29°6′17.24″	117°48′9.47″	57	/
	2017-05-31	10:20:00	2	29°6′17.97″	117°48′8.06″	58	85°
	2017-05-31	10:45:00	2	29°6′17.24″	117°48′9.47″	57	/
	2017-05-31	10:50:00	2	29°6′17.97″	117°48′8.06″	58	55°
	2017-05-31	11:15:00	2	29°6′17.24″	117°48′9.47″	57	67°
	2017-05-31	11:20:00	2	29°6′17.97″	117°48′8.06″	58	54°
	2017-05-31	11:40:00	2	29°6′16.87″	117°48′11.82″	57	8°
	2017-05-31	11:45:00	2	29°6′21.79″	117°48′14.47″	58	/
	2017-05-31	16:35:00	2	29°6′11.92″	117°48′17.93″	55	/
	2017-05-31	16:45:00	2	29°6′14.4″	117°48′14.59″	55.2	/
	2017-05-31	17:02:00	2	29°6′16.87″	117°48′11.82″	57	20°
	2017-05-31	17:12:00	2	29°6′21.79″	117°48′14.47″	58	/
	2017-05-31	17:20:00	2	29°6′21.04″	117°48′10.34″	56	/
	2017-05-31	17:28:00	2	29°6′18.34″	117°48′6.8″	57	/
	2017-05-31	17:40:00	2	29°6′18.34″	117°48′6.8″	57	/
	2017-05-31	17:46:00	2	29°6′15.02″	117°48′9.47″	55	/
	2017-05-31	18:04:00	2	29°6′14.69″	117°48′10.7″	56	/
	2017-05-31	18:10:00	2	29°6′16.87″	117°48′11.82″	57	17°
	2017-05-31	18:25:00	2	29°6′21.79″	117°48′14.47″	58	/
	2017-06-02	08:20:00	2	29°6′17.24″	117°48′9.47″	57	/
	2017-06-02	08:35:00	2	29°6′15.02″	117°48′9.47″	55	/
	2017-06-02	08:53:00	2	29°6′21.79″	117°48′14.47″	58	/
	2017-06-02	09:03:00	2	29°6′21.04″	117°48′10.34″	56	/
	2017-06-02	09:08:00	2	29°6′18.34″	117°48′6.8″	57	/
	2017-06-02	09:34:00	2	29°6′17.24″	117°48′9.47″	57	/
	2017-06-02	09:37:00	2	29°6′15.02″	117°48′9.47″	55	/
	2017-06-02	09:42:00	2	29°6′16.87″	117°48′11.82″	57	33°
	2017-06-02	10:05:00	2	29°6′17.97″	117°48′8.06″	58	95°
	2017-06-02	10:10:00	2	29°6′17.24″	117°48′9.47″	57	74°
	2017-06-02	10:34:00	2	29°6′15.02″	117°48′9.47″	55	43°
	2017-06-02	10:37:00	2	29°6′17.24″	117°48′9.47″	57	/
	2017-06-02	11:05:00	2	29°6′21.04″	117°48′10.34″	56	158°
	2017-06-02	11:10:00	2	29°6′21.79″	117°48′14.47″	58	219°
	2017-06-02	11:37:00	2	29°6′19.4″	117°48′11.3″	50	158°
	2017-06-02	11:45:00	2	29°6′21.79″	117°48′14.47″	58	/
	2017-06-02	16:30:00	2	29°6′11.92″	117°48′17.93″	55	/
	2017-06-02	16:40:00	2	29°6′18.57″	117°48′18.02″	51.6	/
	2017-06-02	16:48:00	2	29°6′21.79″	117°48′14.47″	58	/
	2017-06-02	17:08:00	2	29°6′17.24″	117°48′9.47″	57	/
	2017-06-02	17:13:00	2	29°6′15.02″	117°48′9.47″	55	/
	2017-06-02	17:40:00	2	29°6′17.24″	117°48′9.47″	57	/
	2017-06-02	17:45:00	2	29°6′16.87″	117°48′11.82″	57	/
	2017-06-02	18:10:00	2	29°6′21.04″	117°48′10.34″	56	/
	2017-06-02	18:30:00	2	29°6′17.24″	117°48′9.47″	57	/
	2017-06-02	18:40:00	2	29°6′16.87″	117°48′11.82″	57	/
	2017-06-02	18:50:00	2	29°6′21.79″	117°48′14.47″	58	/
	2017-06-02	08:05:00	2	29°06′18.39″	117°48′11.09″	54.4	64°
	2017-06-02	08:35:00	2	29°06′17.61″	117°48′13.62″	49.4	/
	2017-06-02	09:05:00	2	29°06′17.4″	117°48′12.7″	49	/
	2017-06-02	09:35:00	2	29°06′19.94″	117°48′13.97″	54	227°
	2017-06-02	10:05:00	2	29°06′19.90″	117°48′13.24″	46.7	197°
	2017-06-02	10:35:00	2	29°06′18.69″	117°48′10.98″	50	141°
	2017-06-02	11:05:00	2	29°06′18.52″	117°48′11.00″	52.2	69°
	2017-06-02	11:35:00	2	29°06′17.87″	117°48′10.10″	48.7	94°
	2017-06-02	16:40:00	2	29°06′15.4″	117°48′18.8″	52	/
	2017-06-02	17:10:00	2	29°06′17.42″	117°48′12.59″	48.7	288°
	2017-06-02	17:40:00	2	29°06′19.68″	117°48′13.68″	45.1	234°
	2017-06-02	18:10:00	2	29°06′21.05″	117°48′14.91″	52.4	154°
	2017-06-02	18:40:00	2	29°06′17.89″	117°48′09.41″	50.4	60°
	2017-06-03	06:50:00	2	29°6′17.24″	117°48′9.47″	57	/
	2017-06-03	07:20:00	2	29°6′17.24″	117°48′9.47″	57	/
	2017-06-03	07:25:00	2	29°6′15.02″	117°48′9.47″	55	/
	2017-06-03	07:50:00	2	29°6′14.69″	117°48′10.7″	56	/
	2017-06-03	07:55:00	2	29°6′15.02″	117°48′9.47″	55	/
	2017-06-03	08:20:00	2	29°6′17.24″	117°48′9.47″	57	/
	2017-06-03	08:23:00	2	29°6′15.02″	117°48′9.47″	55	/
	2017-06-03	08:50:00	2	29°6′14.69″	117°48′10.7″	56	/
	2017-06-03	08:57:00	2	29°6′15.02″	117°48′9.47″	55	/
	2017-06-03	09:20:00	2	29°6′15.02″	117°48′9.47″	55	/
	2017-06-03	09:27:00	2	29°6′17.24″	117°48′9.47″	57	/
	2017-06-03	09:50:00	2	29°6′17.24″	117°48′9.47″	57	/
	2017-06-03	09:55:00	2	29°6′15.02″	117°48′9.47″	55	43°
	2017-06-03	10:20:00	2	29°6′14.69″	117°48′10.7″	56	/
	2017-06-03	10:27:00	2	29°6′16.87″	117°48′11.82″	57	30°
	2017-06-03	10:50:00	2	29°6′17.24″	117°48′9.47″	57	/
	2017-06-03	10:54:00	2	29°6′15.02″	117°48′9.47″	55	/
	2017-06-03	11:20:00	2	29°6′14.69″	117°48′10.7″	56	/
	2017-06-03	11:25:00	2	29°6′16.87″	117°48′11.82″	57	27°
	2017-06-03	11:50:00	2	29°6′17.97″	117°48′8.06″	58	/
	2017-06-03	11:58:00	2	29°6′21.79″	117°48′14.47″	58	/
	2017-06-03	16:20:00	2	27°6′19.08″	117°48′17.99″	53.7	/
	2017-06-03	16:25:00	2	29°6′21.79″	117°48′14.47″	58	/
	2017-06-03	16:55:00	2	29°6′21.04″	117°48′10.34″	56	/
	2017-06-03	17:00:00	2	29°6′18.34″	117°48′6.8″	57	/
	2017-06-03	17:20:00	2	29°6′17.97″	117°48′8.06″	58	/
	2017-06-03	17:25:00	2	29°6′17.24″	117°48′9.47″	57	/
	2017-06-03	17:50:00	2	29°6′17.24″	117°48′9.47″	57	/
	2017-06-03	17:55:00	2	29°6′15.02″	117°48′9.47″	55	/
	2017-06-03	18:20:00	2	29°6′14.69″	117°48′10.7″	56	/
	2017-06-03	18:25:00	2	29°6′16.87″	117°48′11.82″	57	20°
	2017-06-03	18:50:00	2	29°6′15.02″	117°48′9.47″	55	/
	2017-06-03	18:52:00	2	29°6′17.24″	117°48′9.47″	57	/
	2017-06-03	06:50:00	2	29°06′14.81″	117°48′09.48″	53.2	63°
	2017-06-03	07:20:00	2	29°06′18.13″	117°48′09.74″	54.7	78°
	2017-06-03	07:50:00	2	29°06′19.02″	117°48′13.79″	51.3	247°
	2017-06-03	08:20:00	2	29°06′20.72″	117°48′14.23″	53	218°
	2017-06-03	08:50:00	2	29°06′22.00″	117°48′14.55″	52.2	228°
	2017-06-03	09:20:00	2	29°06′20.85″	117°48′14.79″	52.9	238°
	2017-06-03	09:50:00	2	29°06′20.77″	117°48′14.93″	47.5	233°
	2017-06-03	10:20:00	2	29°06′17.68″	117°48′12.70″	47.9	309°
	2017-06-03	10:50:00	2	29°06′19.96″	117°48′13.95″	54.1	234°
	2017-06-03	11:20:00	2	29°06′19.99″	117°48′14.02″	49.8	271°
	2017-06-03	11:50:00	2	29°06′15.34″	117°48′09.28″	47.3	186°
	2017-06-03	16:20:00	2	29°06′16.07″	117°48′18.49″	54	93°
	2017-06-03	16:50:00	2	29°06′17.23″	117°48′12.60″	50	3°
	2017-06-03	17:20:00	2	29°06′19.12″	117°48′13.53″	52	223°
	2017-06-03	17:50:00	2	29°06′21.56″	117°48′14.95″	47.5	/
	2017-06-03	18:20:00	2	29°06′21.97″	117°48′14.85″	49.8	213°
	2017-06-03	18:50:00	2	29°06′18.13″	117°48′09.87″	51.2	88°
	2017-06-04	06:50:00	2	29°6′19.08″	117°48′17.99″	53.7	/
	2017-06-04	06:57:00	2	29°6′21.79″	117°48′14.47″	58	/
	2017-06-04	07:20:00	2	29°6′21.04″	117°48′10.34″	56	/
	2017-06-04	07:28:00	2	29°6′18.34″	117°48′6.8″	57	/
	2017-06-04	07:50:00	2	29°6′15.02″	117°48′9.47″	55	/
	2017-06-04	07:57:00	2	29°6′17.24″	117°48′9.47″	57	/
	2017-06-04	08:20:00	2	29°6′17.24″	117°48′9.47″	57	/
	2017-06-04	08:25:00	2	29°6′17.97″	117°48′8.06″	58	/
	2017-06-04	08:50:00	2	29°6′17.24″	117°48′9.47″	57	/
	2017-06-04	08:55:00	2	29°6′17.97″	117°48′8.06″	58	/
	2017-06-04	09:20:00	2	29°6′17.24″	117°48′9.47″	57	/
	2017-06-04	09:25:00	2	29°6′16.87″	117°48′11.82″	57	20°
	2017-06-04	09:55:00	2	29°6′17.24″	117°48′9.47″	57	/
	2017-06-04	09:58:00	2	29°6′16.87″	117°48′11.82″	57	22°
	2017-06-04	10:20:00	2	29°6′17.24″	117°48′9.47″	57	/
	2017-06-04	10:50:00	2	29°6′17.24″	117°48′9.47″	57	/
	2017-06-04	11:20:00	2	29°6′21.79″	117°48′14.47″	58	/
	2017-06-04	11:54:00	2	29°6′21.04″	117°48′10.34″	56	/
	2017-06-04	15:30:00	2	29°6′19.08″	117°48′17.99″	53.7	/
	2017-06-04	15:40:00	2	29°6′21.79″	117°48′14.47″	58	/
	2017-06-04	16:00:00	2	29°6′21.04″	117°48′10.34″	56	/
	2017-06-04	16:30:00	2	29°6′21.04″	117°48′10.34″	56	/
	2017-06-04	17:00:00	2	29°6′17.24″	117°48′9.47″	57	/
	2017-06-04	17:08:00	2	29°6′15.02″	117°48′9.47″	55	/
	2017-06-04	17:30:00	2	29°6′14.69″	117°48′10.7″	56	/
	2017-06-04	17:36:00	2	29°6′17.24″	117°48′9.47″	57	/
	2017-06-04	18:00:00	2	29°6′14.69″	117°48′10.7″	56	/
	2017-06-04	18:10:00	2	29°6′21.04″	117°48′10.34″	56	/
	2017-06-04	18:30:00	2	29°6′21.04″	117°48′10.34″	56	/
	2017-06-04	18:35:00	2	29°6′21.79″	117°48′14.47″	58	/
	2017-06-04	06:50:00	2	29°06′16.11″	117°48′18.49″	50.1	110°
	2017-06-04	07:20:00	2	29°06′18.17″	117°48′10.43″	45.6	/
	2017-06-04	07:50:00	2	29°06′18.53″	117°48′09.31″	55.2	/
	2017-06-04	08:20:00	2	29°06′19.90″	117°48′14.03″	54.8	256°
	2017-06-04	08:50:00	2	29°06′21.77″	117°48′14.49″	51.8	221°
	2017-06-04	09:20:00	2	29°06′21.57″	117°48′14.63″	52.4	245°
	2017-06-04	09:50:00	2	29°06′21.72″	117°48′14.40″	55.5	/
	2017-06-04	10:20:00	2	29°06′21.67″	117°48′14.53″	52.9	215°
	2017-06-04	10:50:00	2	29°06′17.18″	117°48′12.65″	51.4	322°
	2017-06-04	11:20:00	2	29°06′17.08″	117°48′12.83″	49.4	17°
	2017-06-04	11:50:00	2	29°06′21.36″	117°48′14.29″	47.4	/
	2017-06-04	15:30:00	2	29°06′16.08″	117°48′18.54″	48.2	/
	2017-06-04	16:00:00	2	29°06′21.91″	117°48′14.47″	53.9	124°
	2017-06-04	16:30:00	2	29°06′21.56″	117°48′14.61″	55.2	/
	2017-06-04	17:00:00	2	29°06′16.98″	117°48′12.14″	53.2	332°
	2017-06-04	17:30:00	2	29°06′17.30″	117°48′12.78″	50.7	318°
	2017-06-04	18:00:00	2	29°06′17.49″	117°48′13.54″	50.4	264°
	2017-06-04	18:30:00	2	29°06′17.91″	117°48′09.29″	49.7	103°
	2017-06-05	07:20:00	2	29°6′17.24″	117°48′9.47″	57	/
	2017-06-05	07:26:00	2	29°6′17.97″	117°48′8.06″	58	/
	2017-06-05	07:50:00	2	29°6′17.24″	117°48′9.47″	57	/
	2017-06-05	07:55:00	2	29°6′19.51″	117°48′11.29″	57.6	159°
	2017-06-05	08:20:00	2	29°6′17.24″	117°48′9.47″	57	/
	2017-06-05	08:25:00	2	29°6′17.97″	117°48′8.06″	58	/
	2017-06-05	08:43:00	2	29°6′19.76″	117°48′8.42″	57.8	/
	2017-06-05	08:47:00	2	29°6′21.04″	117°48′10.34″	56	/
	2017-06-05	08:51:00	2	29°6′21.79″	117°48′14.47″	58	220°
	2017-06-05	07:20:00	2	29°06′13.12″	117°48′18.21″		307°
	2017-06-05	07:50:00	2	29°06′22.42″	117°48′14.92″		211°
	2017-06-05	08:20:00	2	29°06′21.44″	117°48′14.79″	47.4	210°
	2017-06-05	08:50:00	2	29°06′21.61″	117°48′14.58″	52.4	235°
	2017-06-05	09:20:00	2	29°06′21.68″	117°48′14.61″	52.9	/
	2017-06-05	09:25:00	2	29°06′17.30″	117°48′12.83″	50.7	327°
	2017-06-05	09:50:00	2	29°06′17.01″	117°48′12.43″		347°
	2017-06-05	09:58:00	2	29°06′22.52″	117°48′17.18″		155°
	2017-06-05	10:20:00	2	29°06′22.29″	117°48′14.44″	52.2	212°
	2017-06-05	10:27:00	2	29°06′20.29″	117°48′14.57″	49.8	233°
	2017-06-05	10:50:00	2	29°06′22.81″	117°48′16.54″		/
	2017-06-05	10:55:00	2	29°06′23.71″	117°48′18.53″		/
	2017-06-05	11:20:00	2	29°06′22.79″	117°48′16.68″		/
	2017-06-05	11:28:00	2	29°06′21.78″	117°48′17.24″		236°
	2017-06-05	16:00:00	2	29°06′21.63″	117°48′14.67″	52.4	166°
	2017-06-05	16:08:00	2	29°06′20.87″	117°48′14.64″	52.9	252°
	2017-06-05	16:30:00	2	29°06′21.90″	117°48′14.33″		242°
	2017-06-05	16:37:00	2	29°06′17.40″	117°48′12.86″	49	25°
	2017-06-05	17:00:00	2	29°06′17.20″	117°48′12.41″	51.4	351°
	2017-06-05	17:05:00	2	29°06′18.22″	117°48′10.59″	45.6	90°
	2017-06-05	17:30:00	2	29°06′17.86″	117°48′10.14″	47.9	32°
	2017-06-05	17:36:00	2	29°06′19.84″	117°48′10.43″		130°
	2017-06-05	18:00:00	2	29°06′20.47″	117°48′09.95″		154°
	2017-06-05	18:05:00	2	29°06′22.35″	117°48′11.98″		171°
	2017-06-05	18:30:00	2	29°06′21.72″	117°48′14.49″	55.5	208°
	2017-06-05	18:35:00	2	29°06′21.27″	117°48′14.68″	47.4	207°
	2017-06-10	07:15:00	2	29°6′11.92″	117°48′17.93″	55	/
	2017-06-10	07:20:00	2	29°6′10.79″	117°48′18.01″	53.1	/
	2017-06-10	07:38:00	2	29°6′5.13″	117°48′8.48″	58.2	/
	2017-06-10	07:42:00	2	29°6′4.51″	117°48′6.54″	56.9	/
	2017-06-10	07:57:00	2	29°6′8.64″	117°47′59.33″	56.1	/
	2017-06-10	08:00:00	2	29°6′10.39″	117°48′0.2″	53.3	/
	2017-06-10	08:10:00	2	29°6′18.34″	117°48′6.8″	57	/
	2017-06-10	08:13:00	2	29°6′21.04″	117°48′10.34″	56	/

## Sheet: 20173 original data
				receive signal site coordinate
	date	time	No.	N	E	elevation/m	angle of signal direction
	2017-05-10	08:52:00	3	29°6′18.94″	117°48′9.9″		110°
	2017-05-10	08:54:00	3	29°6′18.7″	117°48′9.5″		93°
	2017-05-10	09:08:00	3	29°6′14.73″	117°48′9.68″		35°
	2017-05-10	09:34:00	3	29°6′16.44″	117°48′4.64″		82°
	2017-05-10	09:49:00	3	29°6′19.31″	117°48′7.79″		112°
	2017-05-10	11:48:00	3				29°6'18.37"，117°48'11.99"
	2017-05-10	14:19:00	3				29°6'18.37"，117°48'11.99"
	2017-05-10	15:20:00	3				29°6'18.37"，117°48'11.99"
	2017-05-10	15:36:00	3				/
	2017-05-10	16:16:00	3	29°6′17.1″	117°48′8.5″		70°
	2017-05-10	16:24:00	3	29°6′14.98″	117°48′9.49″	55	215°
	2017-05-10	16:28:00	3	29°6′16.05″	117°48′8.7″		202°
	2017-05-10	17:02:00	3	29°6′17.52″	117°48′5.62″	57	174°
	2017-05-10	17:11:00	3	29°6′20.14″	117°48′8.59″		202°
	2017-05-10	17:20:00	3	29°6′20.96″	117°48′11.39″		220°
	2017-05-10	18:00:00	3	29°6′18.66″	117°48′11.24″		/
	2017-05-10	18:05:00	3	29°6′17.47″	117°48′9.58″	57	/
	2017-05-10	18:30:00	3				/
	2017-05-11	06:50:00	3				29°6'18.37"，117°48'11.99"
	2017-05-11	09:34:00	3	29°6′14.35″	117°48′24.05″		/
	2017-05-11	09:39:00	3	29°6′14.02″	117°48′21.49″		/
	2017-05-11	10:24:00	3	29°6′15.56″	117°48′3.85″		101°
	2017-05-11	10:28:00	3	29°6′18.95″	117°48′7.4″		29°6'18.37"，117°48'11.99"
	2017-05-11	11:25:00	3				29°6′15″，117°48′5.8″
	2017-05-11	14:35:00	3				/
	2017-05-11	16:16:00	3				29°6'18.37"，117°48'11.99"
	2017-05-11	16:30:00	3	29°6′23.11″	117°48′12.97″		184°
	2017-05-11	17:09:00	3	29°6′15.94″	117°48′4.04″		108°
	2017-05-11	18:15:00	3				29°6'18.37"，117°48'11.99"
	2017-05-11	18:25:00	3	29°6′19.69″	117°48′13.85″		29°6'18.37"，117°48'11.99"
	2017-05-12	08:59:00	3	29°6′15.02″	117°48′9.47″	55	240°
	2017-05-12	09:10:00	3	29°6′17.24″	117°48′9.47″	55	179°
	2017-05-12	09:43:00	3	29°6′20.48″	117°48′13.87″		225°
	2017-05-12	09:50:00	3	29°6′21.29″	117°48′10.57″		206°
	2017-05-12	14:15:00	3	29°6′17.24″	117°48′9.47″	55	214°
	2017-05-12	14:20:00	3	29°6′15.02″	117°48′9.47″	55	283°
	2017-05-12	14:56:00	3	29°6′17.24″	117°48′9.47″	55	112°
	2017-05-12	15:00:00	3	29°6′17.88″	117°48′8″	55	116°
	2017-05-12	15:40:00	3	29°6′15.02″	117°48′9.47″	55	45°
	2017-05-12	15:45:00	3	29°6′17.24″	117°48′9.47″	55	67°
	2017-05-12	16:30:00	3	29°6′17.24″	117°48′9.47″	55	231°
	2017-05-12	16:40:00	3	29°6′15.02″	117°48′9.47″	55	272°
	2017-05-12	17:15:00	3	29°6′20.96″	117°48′10.31″		101°
	2017-05-12	17:20:00	3	29°6′18.57″	117°48′7″		76°
	2017-05-12	17:50:00	3	29°6′15.02″	117°48′9.47″	55	48°
	2017-05-12	17:55:00	3	29°6′17.24″	117°48′9.47″	55	59°
	2017-05-13	07:20:00	3	29°6′17.24″	117°48′9.47″	55	243°
	2017-05-13	07:25:00	3	29°6′15.02″	117°48′9.47″	55	280°
	2017-05-13	08:00:00	3	29°6′15.02″	117°48′9.47″	55	37°
	2017-05-13	08:01:00	3	29°6′17.24″	117°48′9.47″	55	58°
	2017-05-13	09:04:00	3	29°6′21.04″	117°48′10.34″	56	158°
	2017-05-13	09:10:00	3	29°6′18.34″	117°48′6.8″	57	110°
	2017-05-13	09:40:00	3	29°6′18.34″	117°48′6.8″	57	180°
	2017-05-13	09:45:00	3	29°6′21.04″	117°48′10.34″	56	212°
	2017-05-13	10:27:00	3	29°6′17.97″	117°48′8.06″	58	76°
	2017-05-13	10:35:00	3	29°6′17.24″	117°48′9.47″	57	63°
	2017-05-13	10:40:00	3	29°6′15.02″	117°48′9.47″	55	350°-50°
	2017-05-13	11:15:00	3	29°6′18.34″	117°48′6.8″	57	100°-120°
	2017-05-13	11:20:00	3	29°6′21.04″	117°48′10.34″	56	119°-213°
	2017-05-13	14:50:00	3				29°6'18.37"，117°48'11.99"
	2017-05-13	15:50:00	3				29°6'18.37"，117°48'11.99"
	2017-05-13	16:40:00	3	29°6′15.02″	117°48′9.47″	55	38°
	2017-05-13	16:50:00	3	29°6′17.24″	117°48′9.47″	57	88°
	2017-05-13	18:05:00	3	29°6′17.24″	117°48′9.47″	57	50°-170°
	2017-05-13	18:10:00	3	29°6′15.02″	117°48′9.47″	55	20°
	2017-05-14	17:05:00	3	29°6′17.97″	117°48′8.06″	58	219°
	2017-05-14	17:10:00	3	29°6′17.24″	117°48′9.47″	57	243°
	2017-05-14	17:45:00	3	29°6′21.04″	117°48′10.34″	56	215°
	2017-05-14	17:50:00	3	29°6′18.34″	117°48′6.8″	57	183°
	2017-05-14	18:20:00	3	29°6′15.02″	117°48′9.47″	55	40°
	2017-05-14	18:25:00	3	29°6′17.24″	117°48′9.47″	57	84°
	2017-05-15	16:20:00	3	29°6′19.74″	117°48′13.33″		234°
	2017-05-15	16:30:00	3	29°6′17.97″	117°48′8.06″	58	60°
	2017-05-15	17:00:00	3	29°6′17.24″	117°48′9.47″	57	200°
	2017-05-15	17:05:00	3	29°6′15.02″	117°48′9.47″	55	267°
	2017-05-15	17:35:00	3	29°6′17.77″	117°48′11.42″	57	213°
	2017-05-15	17:45:00	3	29°6′17.24″	117°48′9.47″	57	195°
	2017-05-15	17:52:00	3	29°6′15.02″	117°48′9.47″	55	219°
	2017-05-16	08:05:00	3	29°6′18.34″	117°48′6.8″	57	120°
	2017-05-16	08:15:00	3	29°6′21.04″	117°48′10.34″	56	178°
	2017-05-16	09:00:00	3	29°6′17.24″	117°48′9.47″	57	184°
	2017-05-16	09:05:00	3	29°6′15.02″	117°48′9.47″	55	198°
	2017-05-16	16:30:00	3	29°6′21.04″	117°48′10.34″	56	297°
	2017-05-16	16:35:00	3	29°6′18.34″	117°48′6.8″	57	42°
	2017-05-16	17:12:00	3	29°6′17.24″	117°48′9.47″	57	23°
	2017-05-16	17:15:00	3	29°6′15.02″	117°48′9.47″	55	17°
	2017-05-16	16:00:00	3				29°6'18.37"，117°48'11.99"
	2017-05-18	15:15:00	3	29°6′13.2″	117°48′16.22″	56.1	332°
	2017-05-18	15:25:00	3	29°6′13.33″	117°48′12.59″	54.8	3°
	2017-05-18	15:30:00	3	29°6′15.02″	117°48′9.47″	55	37°
	2017-05-18	16:10:00	3	29°6′15.02″	117°48′9.47″	55	273°
	2017-05-18	16:15:00	3	29°6′17.24″	117°48′9.47″	57	225°
	2017-05-18	16:55:00	3	29°6′17.24″	117°48′9.47″	57	56°
	2017-05-18	17:00:00	3	29°6′15.02″	117°48′9.47″	55	48°
	2017-05-18	17:50:00	3	29°6′17.24″	117°48′9.47″	57	88°
	2017-05-18	17:55:00	3	29°6′17.97″	117°48′8.06″	58	113°
	2017-05-18	18:25:00	3	29°6′18.34″	117°48′6.8″	57	98°
	2017-05-18	18:30:00	3	29°6′21.04″	117°48′10.34″	56	83°
	2017-05-18	18:40:00	3	29°6′19.31″	117°48′11.32″		40°
	2017-05-18	18:50:00	3	29°6′19.31″	117°48′11.32″		32°
	2017-05-18	18:55:00	3	29°6′19.67″	117°48′13.36″		237°
	2017-05-19	10:16:00	3	29°6′18.09″	117°48′9.98″		无
	2017-05-19	10:20:00	3	29°6′17.24″	117°48′9.47″	57	/
	2017-05-19	10:55:00	3	29°6′17.77″	117°48′11.42″	57	26°
	2017-05-19	11:00:00	3	29°6′17.24″	117°48′9.47″	57	60°
	2017-05-19	11:23:00	3	29°6′17.24″	117°48′9.47″	57	74°
	2017-05-19	11:34:00	3	29°6′15.02″	117°48′9.47″	55	43°
	2017-05-19	11:38:00	3	29°6′18.19″	117°48′10.4″	57.1	83°
	2017-05-19	17:05:00	3	29°6′18.19″	117°48′10.4″	57.1	187°
	2017-05-19	17:13:00	3	29°6′17.24″	117°48′9.47″	57	114°
	2017-05-19	17:45:00	3	29°6′17.24″	117°48′9.47″	57	107°
	2017-05-19	17:55:00	3	29°6′17.97″	117°48′8.06″	58	110°
	2017-05-19	18:30:00	3	29°6′16.87″	117°48′11.82″	57	0°
	2017-05-19	18:36:00	3	29°6′21.79″	117°48′14.47″	58	247°
	2017-05-20	15:21:00	3	29°6′14.24″	117°48′23.39″		298°
	2017-05-20	15:28:00	3	29°6′13.64″	117°48′19.04″		318°
	2017-05-20	15:35:00	3	29°6′16.71″	117°48′16.43″		300°
	2017-05-20	15:48:00	3	29°6′16.87″	117°48′11.82″	57	288°
	2017-05-20	16:18:00	3	29°6′17.24″	117°48′9.47″	57	/
	2017-05-20	16:25:00	3	29°6′15.02″	117°48′9.47″	55	152°
	2017-05-20	17:05:00	3	29°6′15.02″	117°48′9.47″	55	48°
	2017-05-20	17:15:00	3	29°6′17.24″	117°48′9.47″	57	38°
	2017-05-20	17:35:00	3	29°6′18.34″	117°48′6.8″	57	73°
	2017-05-20	17:52:00	3	29°6′18.34″	117°48′6.8″	57	87°
	2017-05-20	17:57:00	3	29°6′21.04″	117°48′10.34″	56	115°
	2017-05-20	18:25:00	3	29°6′15.02″	117°48′9.47″	55	17°
	2017-05-20	18:35:00	3	29°6′16.87″	117°48′11.82″	57	343°
	2017-05-20	18:46:00	3	29°6′21.79″	117°48′14.47″	58	216°
	2017-05-21	07:32:00	3	29°6′16.87″	117°48′11.82″	57	288°
	2017-05-21	07:40:00	3	29°6′15.02″	117°48′9.47″	55	264°
	2017-05-21	07:45:00	3	29°6′17.24″	117°48′9.47″	57	208°
	2017-05-21	08:18:00	3	29°6′17.24″	117°48′9.47″	57	207°
	2017-05-21	08:23:00	3	29°6′17.97″	117°48′8.06″	58	185°
	2017-05-21	09:00:00	3	29°6′18.34″	117°48′6.8″	57	80°
	2017-05-21	09:08:00	3	29°6′21.04″	117°48′10.34″	56	110°
	2017-05-21	09:40:00	3	29°6′17.24″	117°48′9.47″	57	94°
	2017-05-21	09:48:00	3	29°6′15.02″	117°48′9.47″	55	45°
	2017-05-21	10:25:00	3	29°6′16.87″	117°48′11.82″	57	300°
	2017-05-21	10:30:00	3	29°6′14.69″	117°48′10.7″	56	290°
	2017-05-21	10:55:00	3	29°6′14.69″	117°48′10.7″	56	/
	2017-05-21	11:03:00	3	29°6′15.02″	117°48′9.47″	55	18°
	2017-05-21	11:08:00	3	29°6′17.24″	117°48′9.47″	57	88°
	2017-05-21	11:34:00	3	29°6′17.24″	117°48′9.47″	57	58°
	2017-05-21	11:35:00	3	29°6′17.97″	117°48′8.06″	58	73°
	2017-05-21	15:48:00	3	29°6′17.24″	117°48′9.47″	57	/
	2017-05-21	15:53:00	3	29°6′15.02″	117°48′9.47″	55	/
	2017-05-21	16:28:00	3	29°6′15.02″	117°48′9.47″	55	43°
	2017-05-21	16:35:00	3	29°6′17.24″	117°48′9.47″	57	96°
	2017-05-21	17:00:00	3	29°6′21.04″	117°48′10.34″	56	209°
	2017-05-21	17:08:00	3	29°6′18.34″	117°48′6.8″	57	171°
	2017-05-21	17:15:00	3	29°6′17.97″	117°48′8.06″	58	201°
	2017-05-21	17:20:00	3	29°6′15.02″	117°48′9.47″	55	214°
	2017-05-21	17:50:00	3	29°6′15.02″	117°48′9.47″	55	32°
	2017-05-21	17:55:00	3	29°6′17.24″	117°48′9.47″	57	60°
	2017-05-21	18:00:00	3	29°6′17.97″	117°48′8.06″	58	69°
	2017-05-21	18:22:00	3	29°6′17.97″	117°48′8.06″	58	38°
	2017-05-21	18:28:00	3	29°6′18.34″	117°48′6.8″	57	62°
	2017-05-21	18:35:00	3	29°6′21.04″	117°48′10.34″	56	178°
	2017-05-22	15:50:00	3	29°6′17.97″	117°48′8.06″	58	219°
	2017-05-22	16:04:00	3	29°6′17.24″	117°48′9.47″	57	226°
	2017-05-22	16:33:00	3	29°6′15.02″	117°48′9.47″	55	49°
	2017-05-22	16:35:00	3	29°6′14.69″	117°48′10.7″	56	/
	2017-05-22	16:43:00	3	29°6′16.87″	117°48′11.82″	57	328°
	2017-05-22	16:52:00	3	29°6′17.24″	117°48′9.47″	57	81°
	2017-05-22	17:26:00	3	29°6′17.97″	117°48′8.06″	58	48°
	2017-05-22	17:30:00	3	29°6′18.34″	117°48′6.8″	57	82°
	2017-05-22	17:35:00	3	29°6′21.04″	117°48′10.34″	56	40°
	2017-05-22	17:56:00	3	29°6′21.04″	117°48′10.34″	56	227°
	2017-05-22	18:05:00	3	29°6′18.34″	117°48′6.8″	57	128°
	2017-05-22	18:10:00	3	29°6′17.97″	117°48′8.06″	58	/
	2017-05-22	18:15:00	3	29°6′17.24″	117°48′9.47″	57	240°
	2017-05-22	18:35:00	3	29°6′16.87″	117°48′11.82″	57	12°
	2017-05-22	18:40:00	3	29°6′21.79″	117°48′14.47″	58	213°
	2017-05-26	08:20:00	3	29°6′17.97″	117°48′8.06″	58	183°
	2017-05-26	08:30:00	3	29°6′15.02″	117°48′9.47″	55	24°
	2017-05-26	08:50:00	3	29°6′18.34″	117°48′6.8″	57	77°
	2017-05-26	08:55:00	3	29°6′17.97″	117°48′8.06″	58	161°
	2017-05-26	09:20:00	3	29°6′17.24″	117°48′9.47″	57	203°
	2017-05-26	09:25:00	3	29°6′15.02″	117°48′9.47″	55	43°
	2017-05-26	09:50:00	3	29°6′15.02″	117°48′9.47″	55	12°
	2017-05-26	09:53:00	3	29°6′17.24″	117°48′9.47″	57	57°
	2017-05-26	10:20:00	3	29°6′21.04″	117°48′10.34″	56	93°
	2017-05-26	10:25:00	3	29°6′21.88″	117°48′11.61″		167°
	2017-05-26	10:50:00	3	29°6′21.79″	117°48′14.47″	58	221°
	2017-05-26	10:56:00	3	29°6′16.87″	117°48′11.82″	57	7°
	2017-05-26	11:20:00	3	29°6′17.24″	117°48′9.47″	57	70°
	2017-05-26	11:25:00	3	29°6′15.02″	117°48′9.47″	55	76°
	2017-05-26	11:45:00	3	29°6′15.02″	117°48′9.47″	55	71°
	2017-05-26	11:48:00	3	29°6′17.24″	117°48′9.47″	57	74°
	2017-05-26	16:00:00	3	29°6′16.87″	117°48′11.82″	57	290°
	2017-05-26	16:06:00	3	29°6′21.79″	117°48′14.47″	58	82°
	2017-05-26	16:30:00	3	29°6′15.02″	117°48′9.47″	55	40°
	2017-05-26	16:35:00	3	29°6′17.97″	117°48′8.06″	58	73°
	2017-05-26	17:00:00	3	29°6′17.24″	117°48′9.47″	57	120°
	2017-05-26	17:05:00	3	29°6′15.02″	117°48′9.47″	55	37°
	2017-05-26	17:34:00	3	29°6′18.34″	117°48′6.8″	57	75°
	2017-05-26	17:40:00	3	29°6′17.97″	117°48′8.06″	58	80°
	2017-05-26	18:00:00	3	29°6′15.02″	117°48′9.47″	55	37°
	2017-05-26	18:08:00	3	29°6′14.69″	117°48′10.7″	56	3°
	2017-05-26	18:28:00	3	29°6′14.69″	117°48′10.7″	56	/
	2017-05-26	18:30:00	3	29°6′16.87″	117°48′11.82″	57	0°
	2017-05-26	18:55:00	3	29°6′17.24″	117°48′9.47″	57	317°
	2017-05-26	19:00:00	3	29°6′21.79″	117°48′14.47″	58	218°
	2017-05-26	08:20:00	3	29°06′20.9″	117°48′14.5″	52.9	228°
	2017-05-26	08:50:00	3	29°06′19.1″	117°48′17.1″		261°
	2017-05-26	09:20:00	3	29°06′9.9″	117°48′15.4″		338°
	2017-05-26	09:50:00	3	29°06′10.3″	117°48′10.9″		39°
	2017-05-26	10:20:00	3	29°06′14.5″	117°48′9.0″		34°
	2017-05-26	10:50:00	3	29°06′15.5″	117°48′3.9″		94°
	2017-05-26	11:20:00	3	29°06′21.2″	117°48′10.8″		115°
	2017-05-26	11:50:00	3	29°06′12.3″	117°48′18.1″		111°
	2017-05-26	16:00:00	3	29°06′12.8″	117°48′18.2″		293°
	2017-05-26	16:30:00	3	29°06′10.5″	117°48′10.3″		24°
	2017-05-26	17:00:00	3	29°06′16.3″	117°48′4.2″		77°
	2017-05-26	17:30:00	3	29°06′21.2″	117°48′10.3″		168°
	2017-05-26	18:00:00	3	29°06′21.9″	117°48′14.0″		212°
	2017-05-26	18:30:00	3	29°06′18.4″	117°48′18.1″		284°
	2017-05-26	19:00:00	3	29°06′12.3″	117°48′12.0″		341°
	2017-05-27	10:00:00	3	29°6′17.97″	117°48′8.06″	58	79°
	2017-05-27	10:10:00	3	29°6′18.34″	117°48′6.8″	57	102°
	2017-05-27	10:30:00	3	29°6′15.02″	117°48′9.47″	55	31°
	2017-05-27	10:38:00	3	29°6′14.69″	117°48′10.7″	56	20°
	2017-05-27	10:45:00	3	29°6′21.79″	117°48′14.47″	58	48°
	2017-05-27	11:00:00	3	29°6′21.04″	117°48′10.34″	56	52°
	2017-05-27	11:04:00	3	29°6′18.34″	117°48′6.8″	57	98°
	2017-05-27	16:20:00	3	29°6′15.02″	117°48′9.47″	55	33°
	2017-05-27	16:30:00	3	29°6′17.24″	117°48′9.47″	57	69°
	2017-05-27	16:46:00	3	29°6′17.24″	117°48′9.47″	57	71°
	2017-05-27	16:55:00	3	29°6′16.87″	117°48′11.82″	57	10°
	2017-05-27	17:20:00	3	29°6′15.02″	117°48′9.47″	55	/
	2017-05-27	10:00:00	3	29°06′16.0″	117°48′9.0″		46°
	2017-05-27	10:30:00	3	29°06′13.1″	117°48′12.8″		0°
	2017-05-27	11:00:00	3	29°06′15″	117°48′16″		315°
	2017-05-27	11:10:00	3	29°06′20″	117°48′11″		349°
	2017-05-27	16:20:00	3	29°06′19″	117°48′15″	49.8	296°
	2017-05-27	16:50:00	3	29°06′20″	117°48′11″		143°
	2017-05-27	17:20:00	3	29°06′17″	117°48′09″	49.7	50°
	2017-05-27	17:50:00	3	29°06′15″	117°48′09″		32°
	2017-05-27	18:20:00	3	29°06′12″	117°48′12″		346°
	2017-05-27	18:50:00	3	29°06′14″	117°48′16″		332°
	2017-05-28	07:19:00	3	29°6′11.92″	117°48′17.93″	52.6	44°
	2017-05-28	07:30:00	3	29°6′9.11″	117°48′16.34″		287°
	2017-05-28	07:55:00	3	29°6′7.85″	117°48′12.59″	55.1	/
	2017-05-28	08:10:00	3	29°6′10.25″	117°48′15.03″	51.5	334°
	2017-05-28	08:25:00	3	29°6′8.69″	117°48′10.42″	52.7	96°
	2017-05-28	08:35:00	3	29°6′10.87″	117°48′13.16″	51.1	357°
	2017-05-28	08:50:00	3	29°6′13.28″	117°48′12.67″	52.7	303°
	2017-05-28	09:03:00	3	29°6′15.02″	117°48′9.47″	55	222°
	2017-05-28	09:11:00	3	29°6′16.87″	117°48′11.82″	57	221°
	2017-05-28	10:18:00	3	29°6′17.24″	117°48′9.47″	57	66°
	2017-05-28	10:25:00	3	29°6′15.02″	117°48′9.47″	55	38°
	2017-05-28	10:55:00	3	29°6′17.24″	117°48′9.47″	57	63°
	2017-05-28	11:03:00	3	29°6′21.04″	117°48′10.34″	56	173°
	2017-05-28	11:10:00	3	29°6′21.79″	117°48′14.47″	58	212°
	2017-05-28	11:18:00	3	29°6′17.17″	117°48′14.24″	56.2	305°
	2017-05-28	11:28:00	3	29°6′11.92″	117°48′17.93″	55	320°
	2017-05-28	16:40:00	3	29°6′16.24″	117°48′16.88″	56	305°
	2017-05-28	16:40:00	3	29°6′14.75″	117°48′17.47′		340°
	2017-05-28	16:55:00	3	29°6′20.67″	117°48′13.06″	58.8	95°
	2017-05-28	16:55:00	3	29°6′20.27″	117°48′13.66″		242°
	2017-05-28	17:15:00	3	29°6′17.24″	117°48′9.47″	57	114°
	2017-05-28	17:15:00	3	29°6′19.27″	117°48′15.62″		203°
	2017-05-28	17:30:00	3	29°6′15.02″	117°48′9.47″	55	69°
	2017-05-28	17:30:00	3	29°6′22.02″	117°48′14.79″		219°
	2017-05-28	17:45:00	3	29°6′18.34″	117°48′6.8″	57	61°
	2017-05-28	17:45:00	3	29°6′22.89″	117°48′12.38″		231°
	2017-05-28	18:00:00	3	29°6′21.79″	117°48′14.47″	58	283°
	2017-05-28	18:00:00	3	29°6′18.39″	117°48′6.68″	57	114°
	2017-05-28	18:15:00	3	29°6′16.87″	117°48′11.82″	57	22°
	2017-05-28	18:15:00	3	29°6′15.68″	117°48′3.94″		135°
	2017-05-28	18:30:00	3	29°6′14.69″	117°48′10.7″	56	38°
	2017-05-28	18:30:00	3	29°6′18.57″	117°48′7.43″		55°
	2017-05-31	07:10:00	3	29°6′11.92″	117°48′17.93″	55	283°
	2017-05-31	07:20:00	3	27°6′13″	117°48′14.7″		246°
	2017-05-31	07:35:00	3	29°6′16.87″	117°48′11.82″	57	290°
	2017-05-31	07:50:00	3	29°6′15.02″	117°48′9.47″	55	228°
	2017-05-31	07:58:00	3	29°6′17.24″	117°48′9.47″	57	93°
	2017-05-31	08:30:00	3	29°6′15.02″	117°48′9.47″	55	38°
	2017-05-31	08:35:00	3	29°6′17.24″	117°48′9.47″	57	67°
	2017-05-31	09:04:00	3	29°6′17.24″	117°48′9.47″	57	68°
	2017-05-31	09:15:00	3	29°6′15.02″	117°48′9.47″	55	37°
	2017-05-31	09:35:00	3	29°6′17.24″	117°48′9.47″	57	140°
	2017-05-31	09:40:00	3	29°6′17.97″	117°48′8.06″	58	118°
	2017-05-31	10:15:00	3	29°6′17.24″	117°48′9.47″	57	68°
	2017-05-31	10:20:00	3	29°6′17.97″	117°48′8.06″	58	87°
	2017-05-31	10:45:00	3	29°6′17.24″	117°48′9.47″	57	68°
	2017-05-31	10:50:00	3	29°6′17.97″	117°48′8.06″	58	87°
	2017-05-31	11:15:00	3	29°6′17.24″	117°48′9.47″	57	68°
	2017-05-31	11:20:00	3	29°6′17.97″	117°48′8.06″	58	87°
	2017-05-31	11:40:00	3	29°6′16.87″	117°48′11.82″	57	0°
	2017-05-31	11:45:00	3	29°6′21.79″	117°48′14.47″	58	218°
	2017-05-31	16:35:00	3	29°6′11.92″	117°48′17.93″	55	280°
	2017-05-31	16:45:00	3	29°6′14.4″	117°48′14.59″	55.2	332°
	2017-05-31	17:02:00	3	29°6′16.87″	117°48′11.82″	57	350°
	2017-05-31	17:12:00	3	29°6′21.79″	117°48′14.47″	58	312°
	2017-05-31	17:20:00	3	29°6′21.04″	117°48′10.34″	56	148°
	2017-05-31	17:28:00	3	29°6′18.34″	117°48′6.8″	57	125°
	2017-05-31	17:40:00	3	29°6′18.34″	117°48′6.8″	57	110°
	2017-05-31	17:46:00	3	29°6′15.02″	117°48′9.47″	55	38°
	2017-05-31	18:04:00	3	29°6′14.69″	117°48′10.7″	56	39°
	2017-05-31	18:10:00	3	29°6′16.87″	117°48′11.82″	57	2°
	2017-05-31	18:25:00	3	29°6′21.79″	117°48′14.47″	58	221°
	2017-06-02	08:20:00	3	29°6′17.24″	117°48′9.47″	57	/
	2017-06-02	08:35:00	3	29°6′15.02″	117°48′9.47″	55	/
	2017-06-02	08:53:00	3	29°6′21.79″	117°48′14.47″	58	209°
	2017-06-02	09:03:00	3	29°6′21.04″	117°48′10.34″	56	117°
	2017-06-02	09:08:00	3	29°6′18.34″	117°48′6.8″	57	/
	2017-06-02	09:34:00	3	29°6′17.24″	117°48′9.47″	57	/
	2017-06-02	09:37:00	3	29°6′15.02″	117°48′9.47″	55	/
	2017-06-02	09:42:00	3	29°6′16.87″	117°48′11.82″	57	/
	2017-06-02	10:05:00	3	29°6′17.97″	117°48′8.06″	58	57°
	2017-06-02	10:10:00	3	29°6′17.24″	117°48′9.47″	57	/
	2017-06-02	10:34:00	3	29°6′15.02″	117°48′9.47″	55	/
	2017-06-02	10:37:00	3	29°6′17.24″	117°48′9.47″	57	/
	2017-06-02	11:05:00	3	29°6′21.04″	117°48′10.34″	56	92°
	2017-06-02	11:10:00	3	29°6′21.79″	117°48′14.47″	58	296°
	2017-06-02	11:37:00	3	29°6′19.4″	117°48′11.3″	50	/
	2017-06-02	11:45:00	3	29°6′21.79″	117°48′14.47″	58	295°
	2017-06-02	16:30:00	3	29°6′11.92″	117°48′17.93″	55	/
	2017-06-02	16:40:00	3	29°6′18.57″	117°48′18.02″	51.6	/
	2017-06-02	16:48:00	3	29°6′21.79″	117°48′14.47″	58	243°
	2017-06-02	17:08:00	3	29°6′17.24″	117°48′9.47″	57	/
	2017-06-02	17:13:00	3	29°6′15.02″	117°48′9.47″	55	/
	2017-06-02	17:40:00	3	29°6′17.24″	117°48′9.47″	57	/
	2017-06-02	17:45:00	3	29°6′16.87″	117°48′11.82″	57	/
	2017-06-02	18:10:00	3	29°6′21.04″	117°48′10.34″	56	/
	2017-06-02	18:30:00	3	29°6′17.24″	117°48′9.47″	57	/
	2017-06-02	18:40:00	3	29°6′16.87″	117°48′11.82″	57	/
	2017-06-02	18:50:00	3	29°6′21.79″	117°48′14.47″	58	212°
	2017-06-02	08:05:00	3	29°06′18.39″	117°48′11.09″	54.4	73°
	2017-06-02	08:35:00	3	29°06′17.61″	117°48′13.62″	49.4	/
	2017-06-02	09:05:00	3	29°06′17.4″	117°48′12.7″	49	/
	2017-06-02	09:35:00	3	29°06′19.94″	117°48′13.97″	54	346°
	2017-06-02	10:05:00	3	29°06′19.90″	117°48′13.24″	46.7	/
	2017-06-02	10:35:00	3	29°06′18.69″	117°48′10.98″	50	/
	2017-06-02	11:05:00	3	29°06′18.52″	117°48′11.00″	52.2	/
	2017-06-02	11:35:00	3	29°06′17.87″	117°48′10.10″	48.7	/
	2017-06-02	16:40:00	3	29°06′15.4″	117°48′18.8″	52	129°
	2017-06-02	17:10:00	3	29°06′17.42″	117°48′12.59″	48.7	/
	2017-06-02	17:40:00	3	29°06′19.68″	117°48′13.68″	45.1	24°
	2017-06-02	18:10:00	3	29°06′21.05″	117°48′14.91″	52.4	285°
	2017-06-02	18:40:00	3	29°06′17.89″	117°48′09.41″	50.4	/
	2017-06-03	06:50:00	3	29°6′17.24″	117°48′9.47″	57	/
	2017-06-03	07:20:00	3	29°6′17.24″	117°48′9.47″	57	/
	2017-06-03	07:25:00	3	29°6′15.02″	117°48′9.47″	55	/
	2017-06-03	07:50:00	3	29°6′14.69″	117°48′10.7″	56	/
	2017-06-03	07:55:00	3	29°6′15.02″	117°48′9.47″	55	35°
	2017-06-03	08:20:00	3	29°6′17.24″	117°48′9.47″	57	/
	2017-06-03	08:23:00	3	29°6′15.02″	117°48′9.47″	55	37°
	2017-06-03	08:50:00	3	29°6′14.69″	117°48′10.7″	56	/
	2017-06-03	08:57:00	3	29°6′15.02″	117°48′9.47″	55	/
	2017-06-03	09:20:00	3	29°6′15.02″	117°48′9.47″	55	/
	2017-06-03	09:27:00	3	29°6′17.24″	117°48′9.47″	57	/
	2017-06-03	09:50:00	3	29°6′17.24″	117°48′9.47″	57	/
	2017-06-03	09:55:00	3	29°6′15.02″	117°48′9.47″	55	/
	2017-06-03	10:20:00	3	29°6′14.69″	117°48′10.7″	56	/
	2017-06-03	10:27:00	3	29°6′16.87″	117°48′11.82″	57	/
	2017-06-03	10:50:00	3	29°6′17.24″	117°48′9.47″	57	/
	2017-06-03	10:54:00	3	29°6′15.02″	117°48′9.47″	55	/
	2017-06-03	11:20:00	3	29°6′14.69″	117°48′10.7″	56	/
	2017-06-03	11:25:00	3	29°6′16.87″	117°48′11.82″	57	/
	2017-06-03	11:50:00	3	29°6′17.97″	117°48′8.06″	58	/
	2017-06-03	11:58:00	3	29°6′21.79″	117°48′14.47″	58	217°
	2017-06-03	16:20:00	3	27°6′19.08″	117°48′17.99″	53.7	/
	2017-06-03	16:25:00	3	29°6′21.79″	117°48′14.47″	58	294°
	2017-06-03	16:55:00	3	29°6′21.04″	117°48′10.34″	56	94°
	2017-06-03	17:00:00	3	29°6′18.34″	117°48′6.8″	57	/
	2017-06-03	17:20:00	3	29°6′17.97″	117°48′8.06″	58	/
	2017-06-03	17:25:00	3	29°6′17.24″	117°48′9.47″	57	/
	2017-06-03	17:50:00	3	29°6′17.24″	117°48′9.47″	57	/
	2017-06-03	17:55:00	3	29°6′15.02″	117°48′9.47″	55	/
	2017-06-03	18:20:00	3	29°6′14.69″	117°48′10.7″	56	/
	2017-06-03	18:25:00	3	29°6′16.87″	117°48′11.82″	57	/
	2017-06-03	18:50:00	3	29°6′15.02″	117°48′9.47″	55	/
	2017-06-03	18:52:00	3	29°6′17.24″	117°48′9.47″	57	/
	2017-06-03	06:50:00	3	29°06′14.81″	117°48′09.48″	53.2	/
	2017-06-03	07:20:00	3	29°06′18.13″	117°48′09.74″	54.7	336°
	2017-06-03	07:50:00	3	29°06′19.02″	117°48′13.79″	51.3	12°
	2017-06-03	08:20:00	3	29°06′20.72″	117°48′14.23″	53	280°
	2017-06-03	08:50:00	3	29°06′22.00″	117°48′14.55″	52.2	280°
	2017-06-03	09:20:00	3	29°06′20.85″	117°48′14.79″	52.9	305°
	2017-06-03	09:50:00	3	29°06′20.77″	117°48′14.93″	47.5	244°
	2017-06-03	10:20:00	3	29°06′17.68″	117°48′12.70″	47.9	/
	2017-06-03	10:50:00	3	29°06′19.96″	117°48′13.95″	54.1	342°
	2017-06-03	11:20:00	3	29°06′19.99″	117°48′14.02″	49.8	24°
	2017-06-03	11:50:00	3	29°06′15.34″	117°48′09.28″	47.3	/
	2017-06-03	16:20:00	3	29°06′16.07″	117°48′18.49″	54	/
	2017-06-03	16:50:00	3	29°06′17.23″	117°48′12.60″	50	/
	2017-06-03	17:20:00	3	29°06′19.12″	117°48′13.53″	52	/
	2017-06-03	17:50:00	3	29°06′21.56″	117°48′14.95″	47.5	315°
	2017-06-03	18:20:00	3	29°06′21.97″	117°48′14.85″	49.8	163°
	2017-06-03	18:50:00	3	29°06′18.13″	117°48′09.87″	51.2	42°
	2017-06-04	06:50:00	3	29°6′19.08″	117°48′17.99″	53.7	314°
	2017-06-04	06:57:00	3	29°6′21.79″	117°48′14.47″	58	276°
	2017-06-04	07:20:00	3	29°6′21.04″	117°48′10.34″	56	117°
	2017-06-04	07:28:00	3	29°6′18.34″	117°48′6.8″	57	/
	2017-06-04	07:50:00	3	29°6′15.02″	117°48′9.47″	55	/
	2017-06-04	07:57:00	3	29°6′17.24″	117°48′9.47″	57	/
	2017-06-04	08:20:00	3	29°6′17.24″	117°48′9.47″	57	/
	2017-06-04	08:25:00	3	29°6′17.97″	117°48′8.06″	58	/
	2017-06-04	08:50:00	3	29°6′17.24″	117°48′9.47″	57	/
	2017-06-04	08:55:00	3	29°6′17.97″	117°48′8.06″	58	/
	2017-06-04	09:20:00	3	29°6′17.24″	117°48′9.47″	57	/
	2017-06-04	09:25:00	3	29°6′16.87″	117°48′11.82″	57	/
	2017-06-04	09:55:00	3	29°6′17.24″	117°48′9.47″	57	/
	2017-06-04	09:58:00	3	29°6′16.87″	117°48′11.82″	57	/
	2017-06-04	10:20:00	3	29°6′17.24″	117°48′9.47″	57	/
	2017-06-04	10:50:00	3	29°6′17.24″	117°48′9.47″	57	/
	2017-06-04	11:20:00	3	29°6′21.79″	117°48′14.47″	58	201°
	2017-06-04	11:54:00	3	29°6′21.04″	117°48′10.34″	56	108°
	2017-06-04	15:30:00	3	29°6′19.08″	117°48′17.99″	53.7	295°
	2017-06-04	15:40:00	3	29°6′21.79″	117°48′14.47″	58	260°
	2017-06-04	16:00:00	3	29°6′21.04″	117°48′10.34″	56	109°
	2017-06-04	16:30:00	3	29°6′21.04″	117°48′10.34″	56	76°
	2017-06-04	17:00:00	3	29°6′17.24″	117°48′9.47″	57	/
	2017-06-04	17:08:00	3	29°6′15.02″	117°48′9.47″	55	/
	2017-06-04	17:30:00	3	29°6′14.69″	117°48′10.7″	56	/
	2017-06-04	17:36:00	3	29°6′17.24″	117°48′9.47″	57	39°
	2017-06-04	18:00:00	3	29°6′14.69″	117°48′10.7″	56	/
	2017-06-04	18:10:00	3	29°6′21.04″	117°48′10.34″	56	121°
	2017-06-04	18:30:00	3	29°6′21.04″	117°48′10.34″	56	107°
	2017-06-04	18:35:00	3	29°6′21.79″	117°48′14.47″	58	256°
	2017-06-04	06:50:00	3	29°06′16.11″	117°48′18.49″	50.1	/
	2017-06-04	07:20:00	3	29°06′18.17″	117°48′10.43″	45.6	/
	2017-06-04	07:50:00	3	29°06′18.53″	117°48′09.31″	55.2	85°
	2017-06-04	08:20:00	3	29°06′19.90″	117°48′14.03″	54.8	7°
	2017-06-04	08:50:00	3	29°06′21.77″	117°48′14.49″	51.8	291°
	2017-06-04	09:20:00	3	29°06′21.57″	117°48′14.63″	52.4	314°
	2017-06-04	09:50:00	3	29°06′21.72″	117°48′14.40″	55.5	227°
	2017-06-04	10:20:00	3	29°06′21.67″	117°48′14.53″	52.9	304°
	2017-06-04	10:50:00	3	29°06′17.18″	117°48′12.65″	51.4	/
	2017-06-04	11:20:00	3	29°06′17.08″	117°48′12.83″	49.4	/
	2017-06-04	11:50:00	3	29°06′21.36″	117°48′14.29″	47.4	346°
	2017-06-04	15:30:00	3	29°06′16.08″	117°48′18.54″	48.2	/
	2017-06-04	16:00:00	3	29°06′21.91″	117°48′14.47″	53.9	233°
	2017-06-04	16:30:00	3	29°06′21.56″	117°48′14.61″	55.2	298°
	2017-06-04	17:00:00	3	29°06′16.98″	117°48′12.14″	53.2	/
	2017-06-04	17:30:00	3	29°06′17.30″	117°48′12.78″	50.7	/
	2017-06-04	18:00:00	3	29°06′17.49″	117°48′13.54″	50.4	/
	2017-06-04	18:30:00	3	29°06′17.91″	117°48′09.29″	49.7	/
	2017-06-05	07:20:00	3	29°6′17.24″	117°48′9.47″	57	50°
	2017-06-05	07:26:00	3	29°6′17.97″	117°48′8.06″	58	66°
	2017-06-05	07:50:00	3	29°6′17.24″	117°48′9.47″	57	50°
	2017-06-05	07:55:00	3	29°6′19.51″	117°48′11.29″	57.6	72°
	2017-06-05	08:20:00	3	29°6′17.24″	117°48′9.47″	57	/
	2017-06-05	08:25:00	3	29°6′17.97″	117°48′8.06″	58	66°
	2017-06-05	08:43:00	3	29°6′19.76″	117°48′8.42″	57.8	80°
	2017-06-05	08:47:00	3	29°6′21.04″	117°48′10.34″	56	105°
	2017-06-05	08:51:00	3	29°6′21.79″	117°48′14.47″	58	256°
	2017-06-05	07:20:00	3	29°06′13.12″	117°48′18.21″		346°
	2017-06-05	07:50:00	3	29°06′22.42″	117°48′14.92″		294°
	2017-06-05	08:20:00	3	29°06′21.44″	117°48′14.79″	47.4	294°
	2017-06-05	08:50:00	3	29°06′21.61″	117°48′14.58″	52.4	252°
	2017-06-05	09:20:00	3	29°06′21.68″	117°48′14.61″	52.9	287°
	2017-06-05	09:25:00	3	29°06′17.30″	117°48′12.83″	50.7	/
	2017-06-05	09:50:00	3	29°06′17.01″	117°48′12.43″		/
	2017-06-05	09:58:00	3	29°06′22.52″	117°48′17.18″		45°
	2017-06-05	10:20:00	3	29°06′22.29″	117°48′14.44″	52.2	276°
	2017-06-05	10:27:00	3	29°06′20.29″	117°48′14.57″	49.8	329°
	2017-06-05	10:50:00	3	29°06′22.81″	117°48′16.54″		309°
	2017-06-05	10:55:00	3	29°06′23.71″	117°48′18.53″		351°
	2017-06-05	11:20:00	3	29°06′22.79″	117°48′16.68″		276°
	2017-06-05	11:28:00	3	29°06′21.78″	117°48′17.24″		321°
	2017-06-05	16:00:00	3	29°06′21.63″	117°48′14.67″	52.4	296°
	2017-06-05	16:08:00	3	29°06′20.87″	117°48′14.64″	52.9	327°
	2017-06-05	16:30:00	3	29°06′21.90″	117°48′14.33″		273°
	2017-06-05	16:37:00	3	29°06′17.40″	117°48′12.86″	49	/
	2017-06-05	17:00:00	3	29°06′17.20″	117°48′12.41″	51.4	/
	2017-06-05	17:05:00	3	29°06′18.22″	117°48′10.59″	45.6	/
	2017-06-05	17:30:00	3	29°06′17.86″	117°48′10.14″	47.9	/
	2017-06-05	17:36:00	3	29°06′19.84″	117°48′10.43″		/
	2017-06-05	18:00:00	3	29°06′20.47″	117°48′09.95″		88°
	2017-06-05	18:05:00	3	29°06′22.35″	117°48′11.98″		106°
	2017-06-05	18:30:00	3	29°06′21.72″	117°48′14.49″	55.5	285°
	2017-06-05	18:35:00	3	29°06′21.27″	117°48′14.68″	47.4	321°
	2017-06-10	07:15:00	3	29°6′11.92″	117°48′17.93″	55	350°
	2017-06-10	07:20:00	3	29°6′10.79″	117°48′18.01″	53.1	353°
	2017-06-10	07:38:00	3	29°6′5.13″	117°48′8.48″	58.2	/
	2017-06-10	07:42:00	3	29°6′4.51″	117°48′6.54″	56.9	/
	2017-06-10	07:57:00	3	29°6′8.64″	117°47′59.33″	56.1	/
	2017-06-10	08:00:00	3	29°6′10.39″	117°48′0.2″	53.3	/
	2017-06-10	08:10:00	3	29°6′18.34″	117°48′6.8″	57	/
	2017-06-10	08:13:00	3	29°6′21.04″	117°48′10.34″	56	101°
	2017-06-10	09:00:00	3	29°6′17.97″	117°48′8.06″	58	57°
	2017-06-10	09:02:00	3	29°6′17.24″	117°48′9.47″	57	52°
	2017-06-10	09:30:00	3	29°6′17.24″	117°48′9.47″	57	51°
	2017-06-10	09:33:00	3	29°6′15.02″	117°48′9.47″	55	40°

## Sheet: 20174 original data
				receive signal site coordinate
	date	time	No.	N	E	elevation/m	angle of signal direction
	2017-05-10	11:48:00	4				29°6'18.37"，117°48'11.99"
	2017-05-10	14:19:00	4				29°6'18.37"，117°48'11.99"
	2017-05-10	15:20:00	4				29°6'18.37"，117°48'11.99"
	2017-05-10	15:36:00	4				29°6'18.37"，117°48'11.99"
	2017-05-10	16:16:00	4	29°6′17.1″	117°48′8.5″		78°
	2017-05-10	16:24:00	4	29°6′14.98″	117°48′9.49″	55	34°
	2017-05-10	17:02:00	4	29°6′17.52″	117°48′5.62″	57	/
	2017-05-10	17:11:00	4	29°6′20.14″	117°48′8.59″		99°
	2017-05-10	17:20:00	4	29°6′20.96″	117°48′11.39″		167°
	2017-05-10	18:00:00	4	29°6′18.66″	117°48′11.24″		93°
	2017-05-10	18:05:00	4	29°6′17.47″	117°48′9.58″	57	81°
	2017-05-10	18:30:00	4				29°6'18.37"，117°48'11.99"
	2017-05-11	06:50:00	4				29°6'18.37"，117°48'11.99"
	2017-05-11	09:34:00	4	29°6′14.35″	117°48′24.05″		/
	2017-05-11	09:39:00	4	29°6′14.02″	117°48′21.49″		/
	2017-05-11	10:24:00	4	29°6′15.56″	117°48′3.85″		/
	2017-05-11	10:28:00	4	29°6′18.95″	117°48′7.4″		/
	2017-05-11	11:25:00	4				29°6'18.37"，117°48'11.99"
	2017-05-11	14:35:00	4				29°6'18.37"，117°48'11.99"
	2017-05-11	16:16:00	4				29°6'18.37"，117°48'11.99"
	2017-05-11	16:30:00	4	29°6′23.11″	117°48′12.97″		180°
	2017-05-11	17:09:00	4	29°6′17.54″	117°48′5.85″	57	86°
	2017-05-11	18:15:00	4				29°6'18.37"，117°48'11.99"
	2017-05-11	18:25:00	4	29°6′19.69″	117°48′13.85″		/
	2017-05-12	08:59:00	4	29°6′15.02″	117°48′9.47″	55	48°
	2017-05-12	09:10:00	4	29°6′17.24″	117°48′9.47″	55	72°
	2017-05-12	09:43:00	4	29°6′20.48″	117°48′13.87″		214°
	2017-05-12	09:50:00	4	29°6′21.29″	117°48′10.57″		161°
	2017-05-12	14:15:00	4	29°6′17.24″	117°48′9.47″	55	67°
	2017-05-12	14:20:00	4	29°6′15.02″	117°48′9.47″	55	50°
	2017-05-12	14:56:00	4	29°6′17.24″	117°48′9.47″	55	66°
	2017-05-12	15:00:00	4	29°6′17.88″	117°48′8″	55	102°
	2017-05-12	15:40:00	4	29°6′15.02″	117°48′9.47″	55	46°
	2017-05-12	15:45:00	4	29°6′17.24″	117°48′9.47″	55	57°
	2017-05-12	16:30:00	4	29°6′17.24″	117°48′9.47″	55	66°
	2017-05-12	16:40:00	4	29°6′15.02″	117°48′9.47″	55	43°
	2017-05-12	17:15:00	4	29°6′20.96″	117°48′10.31″		146°
	2017-05-12	17:20:00	4	29°6′18.57″	117°48′7″		101°
	2017-05-12	17:50:00	4	29°6′15.02″	117°48′9.47″	55	53°
	2017-05-12	17:55:00	4	29°6′17.24″	117°48′9.47″	55	67°
	2017-05-13	07:20:00	4	29°6′17.24″	117°48′9.47″	55	59°
	2017-05-13	07:25:00	4	29°6′15.02″	117°48′9.47″	55	38°
	2017-05-13	08:00:00	4	29°6′15.02″	117°48′9.47″	55	39°
	2017-05-13	08:01:00	4	29°6′17.24″	117°48′9.47″	55	60°
	2017-05-13	09:04:00	4	29°6′21.04″	117°48′10.34″	56	178°
	2017-05-13	09:10:00	4	29°6′18.34″	117°48′6.8″	57	97°
	2017-05-13	09:40:00	4	29°6′18.34″	117°48′6.8″	57	96°
	2017-05-13	09:45:00	4	29°6′21.04″	117°48′10.34″	56	172°
	2017-05-13	10:27:00	4	29°6′17.97″	117°48′8.06″	58	77°
	2017-05-13	10:35:00	4	29°6′17.24″	117°48′9.47″	57	66°
	2017-05-13	10:40:00	4	29°6′15.02″	117°48′9.47″	55	33°
	2017-05-13	11:15:00	4	29°6′18.34″	117°48′6.8″	57	93°
	2017-05-13	11:20:00	4	29°6′21.04″	117°48′10.34″	56	175°
	2017-05-13	14:50:00	4				29°6'18.37"，117°48'11.99"
	2017-05-13	15:50:00	4				29°6'18.37"，117°48'11.99"
	2017-05-13	16:40:00	4	29°6′15.02″	117°48′9.47″	55	40°
	2017-05-13	16:50:00	4	29°6′17.24″	117°48′9.47″	57	104°
	2017-05-13	18:05:00	4	29°6′17.24″	117°48′9.47″	57	108°
	2017-05-13	18:10:00	4	29°6′15.02″	117°48′9.47″	55	28°
	2017-05-14	17:05:00	4	29°6′17.97″	117°48′8.06″	58	90°
	2017-05-14	17:10:00	4	29°6′17.24″	117°48′9.47″	57	54°
	2017-05-14	17:45:00	4	29°6′21.04″	117°48′10.34″	56	149°
	2017-05-14	17:50:00	4	29°6′18.34″	117°48′6.8″	57	97°
	2017-05-14	18:20:00	4	29°6′15.02″	117°48′9.47″	55	34°
	2017-05-14	18:25:00	4	29°6′17.24″	117°48′9.47″	57	55°
	2017-05-15	16:20:00	4	29°6′19.74″	117°48′13.33″		241°
	2017-05-15	16:30:00	4	29°6′17.97″	117°48′8.06″	58	79°
	2017-05-15	17:00:00	4	29°6′17.24″	117°48′9.47″	57	61°
	2017-05-15	17:05:00	4	29°6′15.02″	117°48′9.47″	55	34°
	2017-05-15	17:35:00	4	29°6′17.77″	117°48′11.42″	57	21°
	2017-05-15	17:45:00	4	29°6′17.24″	117°48′9.47″	57	62°
	2017-05-15	17:52:00	4	29°6′15.02″	117°48′9.47″	55	44°
	2017-05-16	08:05:00	4	29°6′18.34″	117°48′6.8″	57	100°
	2017-05-16	08:15:00	4	29°6′21.04″	117°48′10.34″	56	173°
	2017-05-16	09:00:00	4	29°6′17.24″	117°48′9.47″	57	78°
	2017-05-16	09:05:00	4	29°6′15.02″	117°48′9.47″	55	44°
	2017-05-16	16:30:00	4	29°6′21.04″	117°48′10.34″	56	165°
	2017-05-16	16:35:00	4	29°6′18.34″	117°48′6.8″	57	98°
	2017-05-16	17:12:00	4	29°6′17.24″	117°48′9.47″	57	74°
	2017-05-16	17:15:00	4	29°6′15.02″	117°48′9.47″	55	48°
	2017-05-16	16:00:00	4				29°6'18.37"，117°48'11.99"
	2017-05-18	15:15:00	4	29°6′13.2″	117°48′16.22″	56.1	335°
	2017-05-18	15:25:00	4	29°6′13.33″	117°48′12.59″	54.8	6°
	2017-05-18	15:30:00	4	29°6′15.02″	117°48′9.47″	55	40°
	2017-05-18	16:10:00	4	29°6′15.02″	117°48′9.47″	55	33°
	2017-05-18	16:15:00	4	29°6′17.24″	117°48′9.47″	57	69°
	2017-05-18	16:55:00	4	29°6′17.24″	117°48′9.47″	57	66°
	2017-05-18	17:00:00	4	29°6′15.02″	117°48′9.47″	55	41°
	2017-05-18	17:50:00	4	29°6′17.24″	117°48′9.47″	57	68°
	2017-05-18	17:55:00	4	29°6′17.97″	117°48′8.06″	58	78°
	2017-05-18	18:25:00	4	29°6′18.34″	117°48′6.8″	57	102°
	2017-05-18	18:30:00	4	29°6′21.04″	117°48′10.34″	56	157°
	2017-05-18	18:40:00	4	29°6′19.31″	117°48′11.32″		119°
	2017-05-18	18:50:00	4	29°6′19.31″	117°48′11.32″		17°
	2017-05-18	18:55:00	4	29°6′19.67″	117°48′13.36″		230°
	2017-05-19	10:16:00	4	29°6′18.09″	117°48′9.98″		75°
	2017-05-19	10:20:00	4	29°6′17.24″	117°48′9.47″	57	58°
	2017-05-19	10:55:00	4	29°6′17.77″	117°48′11.42″	57	30°
	2017-05-19	11:00:00	4	29°6′17.24″	117°48′9.47″	57	58°
	2017-05-19	11:23:00	4	29°6′17.24″	117°48′9.47″	57	77°
	2017-05-19	11:34:00	4	29°6′15.02″	117°48′9.47″	55	37°
	2017-05-19	11:38:00	4	29°6′18.19″	117°48′10.4″	57.1	74°
	2017-05-19	17:05:00	4	29°6′18.19″	117°48′10.4″	57.1	89°
	2017-05-19	17:13:00	4	29°6′17.24″	117°48′9.47″	57	67°
	2017-05-19	17:45:00	4	29°6′17.24″	117°48′9.47″	57	63°
	2017-05-19	17:55:00	4	29°6′17.97″	117°48′8.06″	58	73°
	2017-05-19	18:30:00	4	29°6′16.87″	117°48′11.82″	57	11°
	2017-05-19	18:36:00	4	29°6′21.79″	117°48′14.47″	58	213°
	2017-05-20	15:21:00	4	29°6′14.24″	117°48′23.39″		/
	2017-05-20	15:28:00	4	29°6′13.64″	117°48′19.04″		/
	2017-05-20	15:35:00	4	29°6′16.71″	117°48′16.43″		292°
	2017-05-20	15:48:00	4	29°6′16.87″	117°48′11.82″	57	330°
	2017-05-20	16:18:00	4	29°6′17.24″	117°48′9.47″	57	51°
	2017-05-20	16:25:00	4	29°6′15.02″	117°48′9.47″	55	38°
	2017-05-20	17:05:00	4	29°6′15.02″	117°48′9.47″	55	27°
	2017-05-20	17:15:00	4	29°6′17.24″	117°48′9.47″	57	45°
	2017-05-20	17:35:00	4	29°6′18.34″	117°48′6.8″	57	118°
	2017-05-20	17:52:00	4	29°6′18.34″	117°48′6.8″	57	104°
	2017-05-20	17:57:00	4	29°6′21.04″	117°48′10.34″	56	106°
	2017-05-20	18:25:00	4	29°6′15.02″	117°48′9.47″	55	42°
	2017-05-20	18:35:00	4	29°6′16.87″	117°48′11.82″	57	2°
	2017-05-20	18:46:00	4	29°6′21.79″	117°48′14.47″	58	228°
	2017-05-21	07:32:00	4	29°6′16.87″	117°48′11.82″	57	16°
	2017-05-21	07:40:00	4	29°6′15.02″	117°48′9.47″	55	38°
	2017-05-21	07:45:00	4	29°6′17.24″	117°48′9.47″	57	62°
	2017-05-21	08:18:00	4	29°6′17.24″	117°48′9.47″	57	54°
	2017-05-21	08:23:00	4	29°6′17.97″	117°48′8.06″	58	67°
	2017-05-21	09:00:00	4	29°6′18.34″	117°48′6.8″	57	93°
	2017-05-21	09:08:00	4	29°6′21.04″	117°48′10.34″	56	162°
	2017-05-21	09:40:00	4	29°6′17.24″	117°48′9.47″	57	66°
	2017-05-21	09:48:00	4	29°6′15.02″	117°48′9.47″	55	40°
	2017-05-21	10:25:00	4	29°6′16.87″	117°48′11.82″	57	6°
	2017-05-21	10:30:00	4	29°6′14.69″	117°48′10.7″	56	22°
	2017-05-21	10:55:00	4	29°6′14.69″	117°48′10.7″	56	19°
	2017-05-21	11:03:00	4	29°6′15.02″	117°48′9.47″	55	10°
	2017-05-21	11:08:00	4	29°6′17.24″	117°48′9.47″	57	41°
	2017-05-21	11:34:00	4	29°6′17.24″	117°48′9.47″	57	56°
	2017-05-21	11:35:00	4	29°6′17.97″	117°48′8.06″	58	97°
	2017-05-21	15:48:00	4	29°6′17.24″	117°48′9.47″	57	56°
	2017-05-21	15:53:00	4	29°6′15.02″	117°48′9.47″	55	34°
	2017-05-21	16:28:00	4	29°6′15.02″	117°48′9.47″	55	/
	2017-05-21	16:35:00	4	29°6′17.24″	117°48′9.47″	57	63°
	2017-05-21	17:00:00	4	29°6′21.04″	117°48′10.34″	56	180°
	2017-05-21	17:08:00	4	29°6′18.34″	117°48′6.8″	57	68°
	2017-05-21	17:15:00	4	29°6′17.97″	117°48′8.06″	58	106°
	2017-05-21	17:20:00	4	29°6′15.02″	117°48′9.47″	55	35°
	2017-05-21	17:50:00	4	29°6′15.02″	117°48′9.47″	55	41°
	2017-05-21	17:55:00	4	29°6′17.24″	117°48′9.47″	57	50°
	2017-05-21	18:00:00	4	29°6′17.97″	117°48′8.06″	58	71°
	2017-05-21	18:22:00	4	29°6′17.97″	117°48′8.06″	58	80°
	2017-05-21	18:28:00	4	29°6′18.34″	117°48′6.8″	57	98°
	2017-05-21	18:35:00	4	29°6′21.04″	117°48′10.34″	56	180°
	2017-05-22	15:50:00	4	29°6′17.97″	117°48′8.06″	58	82°
	2017-05-22	16:04:00	4	29°6′17.24″	117°48′9.47″	57	68°
	2017-05-22	16:33:00	4	29°6′15.02″	117°48′9.47″	55	38°
	2017-05-22	16:35:00	4	29°6′14.69″	117°48′10.7″	56	18°
	2017-05-22	16:43:00	4	29°6′16.87″	117°48′11.82″	57	12°
	2017-05-22	16:52:00	4	29°6′17.24″	117°48′9.47″	57	67°
	2017-05-22	17:26:00	4	29°6′17.97″	117°48′8.06″	58	117°
	2017-05-22	17:30:00	4	29°6′18.34″	117°48′6.8″	57	95°
	2017-05-22	17:35:00	4	29°6′21.04″	117°48′10.34″	56	187°
	2017-05-22	17:56:00	4	29°6′21.04″	117°48′10.34″	56	155°
	2017-05-22	18:05:00	4	29°6′18.34″	117°48′6.8″	57	97°
	2017-05-22	18:10:00	4	29°6′17.97″	117°48′8.06″	58	85°
	2017-05-22	18:15:00	4	29°6′17.24″	117°48′9.47″	57	89°
	2017-05-22	18:35:00	4	29°6′16.87″	117°48′11.82″	57	8°
	2017-05-22	18:40:00	4	29°6′21.79″	117°48′14.47″	58	227°
	2017-05-26	08:20:00	4	29°6′17.97″	117°48′8.06″	58	87°
	2017-05-26	08:30:00	4	29°6′15.02″	117°48′9.47″	55	41°
	2017-05-26	08:50:00	4	29°6′18.34″	117°48′6.8″	57	88°
	2017-05-26	08:55:00	4	29°6′17.97″	117°48′8.06″	58	153°
	2017-05-26	09:20:00	4	29°6′17.24″	117°48′9.47″	57	60°
	2017-05-26	09:25:00	4	29°6′15.02″	117°48′9.47″	55	34°
	2017-05-26	09:50:00	4	29°6′15.02″	117°48′9.47″	55	50°
	2017-05-26	09:53:00	4	29°6′17.24″	117°48′9.47″	57	60°
	2017-05-26	10:20:00	4	29°6′21.04″	117°48′10.34″	56	101°
	2017-05-26	10:25:00	4	29°6′21.88″	117°48′11.61″		185°
	2017-05-26	10:50:00	4	29°6′21.79″	117°48′14.47″	58	244°
	2017-05-26	10:56:00	4	29°6′16.87″	117°48′11.82″	57	328°
	2017-05-26	11:20:00	4	29°6′17.24″	117°48′9.47″	57	68°
	2017-05-26	11:25:00	4	29°6′15.02″	117°48′9.47″	55	45°
	2017-05-26	11:45:00	4	29°6′15.02″	117°48′9.47″	55	52°
	2017-05-26	11:48:00	4	29°6′17.24″	117°48′9.47″	57	64°
	2017-05-26	16:00:00	4	29°6′16.87″	117°48′11.82″	57	338°
	2017-05-26	16:06:00	4	29°6′21.79″	117°48′14.47″	58	16°
	2017-05-26	16:30:00	4	29°6′15.02″	117°48′9.47″	55	42°
	2017-05-26	16:35:00	4	29°6′17.97″	117°48′8.06″	58	80°
	2017-05-26	17:00:00	4	29°6′17.24″	117°48′9.47″	57	66°
	2017-05-26	17:05:00	4	29°6′15.02″	117°48′9.47″	55	34°
	2017-05-26	17:34:00	4	29°6′18.34″	117°48′6.8″	57	93°
	2017-05-26	17:40:00	4	29°6′17.97″	117°48′8.06″	58	115°
	2017-05-26	18:00:00	4	29°6′15.02″	117°48′9.47″	55	35°
	2017-05-26	18:08:00	4	29°6′14.69″	117°48′10.7″	56	/
	2017-05-26	18:28:00	4	29°6′14.69″	117°48′10.7″	56	19°
	2017-05-26	18:30:00	4	29°6′16.87″	117°48′11.82″	57	10°
	2017-05-26	18:55:00	4	29°6′17.24″	117°48′9.47″	57	58°
	2017-05-26	19:00:00	4	29°6′21.79″	117°48′14.47″	58	223°
	2017-05-26	08:20:00	4	29°06′20.9″	117°48′14.5″	52.9	/
	2017-05-26	08:50:00	4	29°06′19.1″	117°48′17.1″		164°
	2017-05-26	09:20:00	4	29°06′9.9″	117°48′15.4″		/
	2017-05-26	09:50:00	4	29°06′10.3″	117°48′10.9″		/
	2017-05-26	10:20:00	4	29°06′14.5″	117°48′9.0″		/
	2017-05-26	10:50:00	4	29°06′15.5″	117°48′3.9″		/
	2017-05-26	11:20:00	4	29°06′21.2″	117°48′10.8″		/
	2017-05-26	11:50:00	4	29°06′12.3″	117°48′18.1″		/
	2017-05-26	16:00:00	4	29°06′12.8″	117°48′18.2″		/
	2017-05-26	16:30:00	4	29°06′10.5″	117°48′10.3″		/
	2017-05-26	17:00:00	4	29°06′16.3″	117°48′4.2″		/
	2017-05-26	17:30:00	4	29°06′21.2″	117°48′10.3″		/
	2017-05-26	18:00:00	4	29°06′21.9″	117°48′14.0″		/
	2017-05-26	18:30:00	4	29°06′18.4″	117°48′18.1″		119°
	2017-05-26	19:00:00	4	29°06′12.3″	117°48′12.0″		/
	2017-05-27	10:00:00	4	29°6′17.97″	117°48′8.06″	58	82°
	2017-05-27	10:10:00	4	29°6′18.34″	117°48′6.8″	57	93°
	2017-05-27	10:30:00	4	29°6′15.02″	117°48′9.47″	55	32°
	2017-05-27	10:38:00	4	29°6′14.69″	117°48′10.7″	56	25°
	2017-05-27	10:45:00	4	29°6′21.79″	117°48′14.47″	58	219°
	2017-05-27	11:00:00	4	29°6′21.04″	117°48′10.34″	56	161°
	2017-05-27	11:04:00	4	29°6′18.34″	117°48′6.8″	57	93°
	2017-05-27	16:20:00	4	29°6′15.02″	117°48′9.47″	55	37°
	2017-05-27	16:30:00	4	29°6′17.24″	117°48′9.47″	57	87°
	2017-05-27	16:46:00	4	29°6′17.24″	117°48′9.47″	57	69°
	2017-05-27	16:55:00	4	29°6′16.87″	117°48′11.82″	57	13°
	2017-05-27	17:20:00	4	29°6′15.02″	117°48′9.47″	55	40°
	2017-05-27	10:00:00	4	29°06′16.0″	117°48′9.0″		/
	2017-05-27	10:30:00	4	29°06′13.1″	117°48′12.8″		/
	2017-05-27	11:00:00	4	29°06′15″	117°48′16″		/
	2017-05-27	11:10:00	4	29°06′20″	117°48′11″		/
	2017-05-27	16:20:00	4	29°06′19″	117°48′15″	49.8	241°
	2017-05-27	16:50:00	4	29°06′20″	117°48′11″		205°
	2017-05-27	17:20:00	4	29°06′17″	117°48′09″	49.7	93°
	2017-05-27	17:50:00	4	29°06′15″	117°48′09″		81°
	2017-05-27	18:20:00	4	29°06′12″	117°48′12″		/
	2017-05-27	18:50:00	4	29°06′14″	117°48′16″		50°
	2017-05-28	07:19:00	4	29°6′11.92″	117°48′17.93″	52.6	/
	2017-05-28	07:30:00	4	29°6′9.11″	117°48′16.34″		/
	2017-05-28	07:55:00	4	29°6′7.85″	117°48′12.59″	55.1	/
	2017-05-28	08:10:00	4	29°6′10.25″	117°48′15.03″	51.5	/
	2017-05-28	08:25:00	4	29°6′8.69″	117°48′10.42″	52.7	/
	2017-05-28	08:35:00	4	29°6′10.87″	117°48′13.16″	51.1	/
	2017-05-28	08:50:00	4	29°6′13.28″	117°48′12.67″	52.7	40°
	2017-05-28	09:03:00	4	29°6′15.02″	117°48′9.47″	55	42°
	2017-05-28	09:11:00	4	29°6′16.87″	117°48′11.82″	57	12°
	2017-05-28	10:18:00	4	29°6′17.24″	117°48′9.47″	57	60°
	2017-05-28	10:25:00	4	29°6′15.02″	117°48′9.47″	55	42°
	2017-05-28	10:55:00	4	29°6′17.24″	117°48′9.47″	57	65°
	2017-05-28	11:03:00	4	29°6′21.04″	117°48′10.34″	56	139°
	2017-05-28	11:10:00	4	29°6′21.79″	117°48′14.47″	58	206°
	2017-05-28	11:18:00	4	29°6′17.17″	117°48′14.24″	56.2	307°
	2017-05-28	11:28:00	4	29°6′11.92″	117°48′17.93″	55	/
	2017-05-28	16:40:00	4	29°6′16.24″	117°48′16.88″	56	/
	2017-05-28	16:40:00	4	29°6′14.75″	117°48′17.47′		317°
	2017-05-28	16:55:00	4	29°6′20.67″	117°48′13.06″	58.8	198°
	2017-05-28	16:55:00	4	29°6′20.27″	117°48′13.66″		314°
	2017-05-28	17:15:00	4	29°6′17.24″	117°48′9.47″	57	83°
	2017-05-28	17:15:00	4	29°6′19.27″	117°48′15.62″		258°
	2017-05-28	17:30:00	4	29°6′15.02″	117°48′9.47″	55	52°
	2017-05-28	17:30:00	4	29°6′22.02″	117°48′14.79″		228°
	2017-05-28	17:45:00	4	29°6′18.34″	117°48′6.8″	57	108°
	2017-05-28	17:45:00	4	29°6′22.89″	117°48′12.38″		177°
	2017-05-28	18:00:00	4	29°6′21.79″	117°48′14.47″	58	214°
	2017-05-28	18:00:00	4	29°6′18.39″	117°48′6.68″	57	137°
	2017-05-28	18:15:00	4	29°6′16.87″	117°48′11.82″	57	23°
	2017-05-28	18:15:00	4	29°6′15.68″	117°48′3.94″		190°
	2017-05-28	18:30:00	4	29°6′14.69″	117°48′10.7″	56	52°
	2017-05-28	18:30:00	4	29°6′18.57″	117°48′7.43″		85°
	2017-05-31	07:10:00	4	29°6′11.92″	117°48′17.93″	55	/
	2017-05-31	07:20:00	4	27°6′13″	117°48′14.7″		305°
	2017-05-31	07:35:00	4	29°6′16.87″	117°48′11.82″	57	355°
	2017-05-31	07:50:00	4	29°6′15.02″	117°48′9.47″	55	47°
	2017-05-31	07:58:00	4	29°6′17.24″	117°48′9.47″	57	72°
	2017-05-31	08:30:00	4	29°6′15.02″	117°48′9.47″	55	42°
	2017-05-31	08:35:00	4	29°6′17.24″	117°48′9.47″	57	73°
	2017-05-31	09:04:00	4	29°6′17.24″	117°48′9.47″	57	72°
	2017-05-31	09:15:00	4	29°6′15.02″	117°48′9.47″	55	40°
	2017-05-31	09:35:00	4	29°6′17.24″	117°48′9.47″	57	80°
	2017-05-31	09:40:00	4	29°6′17.97″	117°48′8.06″	58	87°
	2017-05-31	10:15:00	4	29°6′17.24″	117°48′9.47″	57	95°
	2017-05-31	10:20:00	4	29°6′17.97″	117°48′8.06″	58	93°
	2017-05-31	10:45:00	4	29°6′17.24″	117°48′9.47″	57	65°
	2017-05-31	10:50:00	4	29°6′17.97″	117°48′8.06″	58	88°
	2017-05-31	11:15:00	4	29°6′17.24″	117°48′9.47″	57	69°
	2017-05-31	11:20:00	4	29°6′17.97″	117°48′8.06″	58	86°
	2017-05-31	11:40:00	4	29°6′16.87″	117°48′11.82″	57	2°
	2017-05-31	11:45:00	4	29°6′21.79″	117°48′14.47″	58	216°
	2017-05-31	16:35:00	4	29°6′11.92″	117°48′17.93″	55	/
	2017-05-31	16:45:00	4	29°6′14.4″	117°48′14.59″	55.2	/
	2017-05-31	17:02:00	4	29°6′16.87″	117°48′11.82″	57	351°
	2017-05-31	17:12:00	4	29°6′21.79″	117°48′14.47″	58	234°
	2017-05-31	17:20:00	4	29°6′21.04″	117°48′10.34″	56	177°
	2017-05-31	17:28:00	4	29°6′18.34″	117°48′6.8″	57	102°
	2017-05-31	17:40:00	4	29°6′18.34″	117°48′6.8″	57	101°
	2017-05-31	17:46:00	4	29°6′15.02″	117°48′9.47″	55	37°
	2017-05-31	18:04:00	4	29°6′14.69″	117°48′10.7″	56	28°
	2017-05-31	18:10:00	4	29°6′16.87″	117°48′11.82″	57	325°
	2017-05-31	18:25:00	4	29°6′21.79″	117°48′14.47″	58	224°
	2017-06-02	08:20:00	4	29°6′17.24″	117°48′9.47″	57	80°
	2017-06-02	08:35:00	4	29°6′15.02″	117°48′9.47″	55	44°
	2017-06-02	08:53:00	4	29°6′21.79″	117°48′14.47″	58	210°
	2017-06-02	09:03:00	4	29°6′21.04″	117°48′10.34″	56	154°
	2017-06-02	09:08:00	4	29°6′18.34″	117°48′6.8″	57	103°
	2017-06-02	09:34:00	4	29°6′17.24″	117°48′9.47″	57	77°
	2017-06-02	09:37:00	4	29°6′15.02″	117°48′9.47″	55	52°
	2017-06-02	09:42:00	4	29°6′16.87″	117°48′11.82″	57	22°
	2017-06-02	10:05:00	4	29°6′17.97″	117°48′8.06″	58	92°
	2017-06-02	10:10:00	4	29°6′17.24″	117°48′9.47″	57	75°
	2017-06-02	10:34:00	4	29°6′15.02″	117°48′9.47″	55	45°
	2017-06-02	10:37:00	4	29°6′17.24″	117°48′9.47″	57	76°
	2017-06-02	11:05:00	4	29°6′21.04″	117°48′10.34″	56	160°
	2017-06-02	11:10:00	4	29°6′21.79″	117°48′14.47″	58	219°
	2017-06-02	11:37:00	4	29°6′19.4″	117°48′11.3″	50	162°
	2017-06-02	11:45:00	4	29°6′21.79″	117°48′14.47″	58	220°
	2017-06-02	16:30:00	4	29°6′11.92″	117°48′17.93″	55	/
	2017-06-02	16:40:00	4	29°6′18.57″	117°48′18.02″	51.6	/
	2017-06-02	16:48:00	4	29°6′21.79″	117°48′14.47″	58	218°
	2017-06-02	17:08:00	4	29°6′17.24″	117°48′9.47″	57	80°
	2017-06-02	17:13:00	4	29°6′15.02″	117°48′9.47″	55	45°
	2017-06-02	17:40:00	4	29°6′17.24″	117°48′9.47″	57	78°
	2017-06-02	17:45:00	4	29°6′16.87″	117°48′11.82″	57	3°
	2017-06-02	18:10:00	4	29°6′21.04″	117°48′10.34″	56	158°
	2017-06-02	18:30:00	4	29°6′17.24″	117°48′9.47″	57	78°
	2017-06-02	18:40:00	4	29°6′16.87″	117°48′11.82″	57	19°
	2017-06-02	18:50:00	4	29°6′21.79″	117°48′14.47″	58	228°
	2017-06-02	08:05:00	4	29°06′18.39″	117°48′11.09″	54.4	100°
	2017-06-02	08:35:00	4	29°06′17.61″	117°48′13.62″	49.4	318°
	2017-06-02	09:05:00	4	29°06′17.4″	117°48′12.7″	49	/
	2017-06-02	09:35:00	4	29°06′19.94″	117°48′13.97″	54	233°
	2017-06-02	10:05:00	4	29°06′19.90″	117°48′13.24″	46.7	254°
	2017-06-02	10:35:00	4	29°06′18.69″	117°48′10.98″	50	85°
	2017-06-02	11:05:00	4	29°06′18.52″	117°48′11.00″	52.2	96°
	2017-06-02	11:35:00	4	29°06′17.87″	117°48′10.10″	48.7	69°
	2017-06-02	16:40:00	4	29°06′15.4″	117°48′18.8″	52	121°
	2017-06-02	17:10:00	4	29°06′17.42″	117°48′12.59″	48.7	11°
	2017-06-02	17:40:00	4	29°06′19.68″	117°48′13.68″	45.1	/
	2017-06-02	18:10:00	4	29°06′21.05″	117°48′14.91″	52.4	/
	2017-06-02	18:40:00	4	29°06′17.89″	117°48′09.41″	50.4	77°
	2017-06-03	06:50:00	4	29°6′17.24″	117°48′9.47″	57	70°
	2017-06-03	07:20:00	4	29°6′17.24″	117°48′9.47″	57	81°
	2017-06-03	07:25:00	4	29°6′15.02″	117°48′9.47″	55	43°
	2017-06-03	07:50:00	4	29°6′14.69″	117°48′10.7″	56	30°
	2017-06-03	07:55:00	4	29°6′15.02″	117°48′9.47″	55	51°
	2017-06-03	08:20:00	4	29°6′17.24″	117°48′9.47″	57	73°
	2017-06-03	08:23:00	4	29°6′15.02″	117°48′9.47″	55	53°
	2017-06-03	08:50:00	4	29°6′14.69″	117°48′10.7″	56	31°
	2017-06-03	08:57:00	4	29°6′15.02″	117°48′9.47″	55	40°
	2017-06-03	09:20:00	4	29°6′15.02″	117°48′9.47″	55	47°
	2017-06-03	09:27:00	4	29°6′17.24″	117°48′9.47″	57	74°
	2017-06-03	09:50:00	4	29°6′17.24″	117°48′9.47″	57	75°
	2017-06-03	09:55:00	4	29°6′15.02″	117°48′9.47″	55	48°
	2017-06-03	10:20:00	4	29°6′14.69″	117°48′10.7″	56	36°
	2017-06-03	10:27:00	4	29°6′16.87″	117°48′11.82″	57	25°
	2017-06-03	10:50:00	4	29°6′17.24″	117°48′9.47″	57	74°
	2017-06-03	10:54:00	4	29°6′15.02″	117°48′9.47″	55	45°
	2017-06-03	11:20:00	4	29°6′14.69″	117°48′10.7″	56	35°
	2017-06-03	11:25:00	4	29°6′16.87″	117°48′11.82″	57	16°
	2017-06-03	11:50:00	4	29°6′17.97″	117°48′8.06″	58	92°
	2017-06-03	11:58:00	4	29°6′21.79″	117°48′14.47″	58	223°
	2017-06-03	16:20:00	4	27°6′19.08″	117°48′17.99″	53.7	275°
	2017-06-03	16:25:00	4	29°6′21.79″	117°48′14.47″	58	219°
	2017-06-03	16:55:00	4	29°6′21.04″	117°48′10.34″	56	154°
	2017-06-03	17:00:00	4	29°6′18.34″	117°48′6.8″	57	122°
	2017-06-03	17:20:00	4	29°6′17.97″	117°48′8.06″	58	82°
	2017-06-03	17:25:00	4	29°6′17.24″	117°48′9.47″	57	40°
	2017-06-03	17:50:00	4	29°6′17.24″	117°48′9.47″	57	72°
	2017-06-03	17:55:00	4	29°6′15.02″	117°48′9.47″	55	45°
	2017-06-03	18:20:00	4	29°6′14.69″	117°48′10.7″	56	28°
	2017-06-03	18:25:00	4	29°6′16.87″	117°48′11.82″	57	23°
	2017-06-03	18:50:00	4	29°6′15.02″	117°48′9.47″	55	54°
	2017-06-03	18:52:00	4	29°6′17.24″	117°48′9.47″	57	70°
	2017-06-03	06:50:00	4	29°06′14.81″	117°48′09.48″	53.2	30°
	2017-06-03	07:20:00	4	29°06′18.13″	117°48′09.74″	54.7	61°
	2017-06-03	07:50:00	4	29°06′19.02″	117°48′13.79″	51.3	237°
	2017-06-03	08:20:00	4	29°06′20.72″	117°48′14.23″	53	229°
	2017-06-03	08:50:00	4	29°06′22.00″	117°48′14.55″	52.2	215°
	2017-06-03	09:20:00	4	29°06′20.85″	117°48′14.79″	52.9	/
	2017-06-03	09:50:00	4	29°06′20.77″	117°48′14.93″	47.5	/
	2017-06-03	10:20:00	4	29°06′17.68″	117°48′12.70″	47.9	327°
	2017-06-03	10:50:00	4	29°06′19.96″	117°48′13.95″	54.1	252°
	2017-06-03	11:20:00	4	29°06′19.99″	117°48′14.02″	49.8	253°
	2017-06-03	11:50:00	4	29°06′15.34″	117°48′09.28″	47.3	/
	2017-06-03	16:20:00	4	29°06′16.07″	117°48′18.49″	54	/
	2017-06-03	16:50:00	4	29°06′17.23″	117°48′12.60″	50	327°
	2017-06-03	17:20:00	4	29°06′19.12″	117°48′13.53″	52	265°
	2017-06-03	17:50:00	4	29°06′21.56″	117°48′14.95″	47.5	/
	2017-06-03	18:20:00	4	29°06′21.97″	117°48′14.85″	49.8	275°
	2017-06-03	18:50:00	4	29°06′18.13″	117°48′09.87″	51.2	85°
	2017-06-04	06:50:00	4	29°6′19.08″	117°48′17.99″	53.7	270°
	2017-06-04	06:57:00	4	29°6′21.79″	117°48′14.47″	58	218°
	2017-06-04	07:20:00	4	29°6′21.04″	117°48′10.34″	56	165°
	2017-06-04	07:28:00	4	29°6′18.34″	117°48′6.8″	57	98°
	2017-06-04	07:50:00	4	29°6′15.02″	117°48′9.47″	55	40°
	2017-06-04	07:57:00	4	29°6′17.24″	117°48′9.47″	57	69°
	2017-06-04	08:20:00	4	29°6′17.24″	117°48′9.47″	57	67°
	2017-06-04	08:25:00	4	29°6′17.97″	117°48′8.06″	58	85°
	2017-06-04	08:50:00	4	29°6′17.24″	117°48′9.47″	57	69°
	2017-06-04	08:55:00	4	29°6′17.97″	117°48′8.06″	58	83°
	2017-06-04	09:20:00	4	29°6′17.24″	117°48′9.47″	57	74°
	2017-06-04	09:25:00	4	29°6′16.87″	117°48′11.82″	57	20°
	2017-06-04	09:55:00	4	29°6′17.24″	117°48′9.47″	57	68°
	2017-06-04	09:58:00	4	29°6′16.87″	117°48′11.82″	57	20°
	2017-06-04	10:20:00	4	29°6′17.24″	117°48′9.47″	57	70°
	2017-06-04	10:50:00	4	29°6′17.24″	117°48′9.47″	57	68°
	2017-06-04	11:20:00	4	29°6′21.79″	117°48′14.47″	58	225°
	2017-06-04	11:54:00	4	29°6′21.04″	117°48′10.34″	56	158°
	2017-06-04	15:30:00	4	29°6′19.08″	117°48′17.99″	53.7	276°
	2017-06-04	15:40:00	4	29°6′21.79″	117°48′14.47″	58	221°
	2017-06-04	16:00:00	4	29°6′21.04″	117°48′10.34″	56	156°
	2017-06-04	16:30:00	4	29°6′21.04″	117°48′10.34″	56	157°
	2017-06-04	17:00:00	4	29°6′17.24″	117°48′9.47″	57	65°
	2017-06-04	17:08:00	4	29°6′15.02″	117°48′9.47″	55	41°
	2017-06-04	17:30:00	4	29°6′14.69″	117°48′10.7″	56	22°
	2017-06-04	17:36:00	4	29°6′17.24″	117°48′9.47″	57	65°
	2017-06-04	18:00:00	4	29°6′14.69″	117°48′10.7″	56	26°
	2017-06-04	18:10:00	4	29°6′21.04″	117°48′10.34″	56	163°
	2017-06-04	18:30:00	4	29°6′21.04″	117°48′10.34″	56	156°
	2017-06-04	18:35:00	4	29°6′21.79″	117°48′14.47″	58	219°
	2017-06-04	06:50:00	4	29°06′16.11″	117°48′18.49″	50.1	/
	2017-06-04	07:20:00	4	29°06′18.17″	117°48′10.43″	45.6	58°
	2017-06-04	07:50:00	4	29°06′18.53″	117°48′09.31″	55.2	112°
	2017-06-04	08:20:00	4	29°06′19.90″	117°48′14.03″	54.8	246°
	2017-06-04	08:50:00	4	29°06′21.77″	117°48′14.49″	51.8	192°
	2017-06-04	09:20:00	4	29°06′21.57″	117°48′14.63″	52.4	132°
	2017-06-04	09:50:00	4	29°06′21.72″	117°48′14.40″	55.5	225°
	2017-06-04	10:20:00	4	29°06′21.67″	117°48′14.53″	52.9	163°
	2017-06-04	10:50:00	4	29°06′17.18″	117°48′12.65″	51.4	307°
	2017-06-04	11:20:00	4	29°06′17.08″	117°48′12.83″	49.4	322°
	2017-06-04	11:50:00	4	29°06′21.36″	117°48′14.29″	47.4	205°
	2017-06-04	15:30:00	4	29°06′16.08″	117°48′18.54″	48.2	294°
	2017-06-04	16:00:00	4	29°06′21.91″	117°48′14.47″	53.9	315°
	2017-06-04	16:30:00	4	29°06′21.56″	117°48′14.61″	55.2	/
	2017-06-04	17:00:00	4	29°06′16.98″	117°48′12.14″	53.2	13°
	2017-06-04	17:30:00	4	29°06′17.30″	117°48′12.78″	50.7	9°
	2017-06-04	18:00:00	4	29°06′17.49″	117°48′13.54″	50.4	331°
	2017-06-04	18:30:00	4	29°06′17.91″	117°48′09.29″	49.7	78°
	2017-06-05	07:20:00	4	29°6′17.24″	117°48′9.47″	57	71°
	2017-06-05	07:26:00	4	29°6′17.97″	117°48′8.06″	58	90°
	2017-06-05	07:50:00	4	29°6′17.24″	117°48′9.47″	57	70°
	2017-06-05	07:55:00	4	29°6′19.51″	117°48′11.29″	57.6	168°
	2017-06-05	08:20:00	4	29°6′17.24″	117°48′9.47″	57	74°
	2017-06-05	08:25:00	4	29°6′17.97″	117°48′8.06″	58	92°
	2017-06-05	08:43:00	4	29°6′19.76″	117°48′8.42″	57.8	131°
	2017-06-05	08:47:00	4	29°6′21.04″	117°48′10.34″	56	163°
	2017-06-05	08:51:00	4	29°6′21.79″	117°48′14.47″	58	226°
	2017-06-05	07:20:00	4	29°06′13.12″	117°48′18.21″		260°
	2017-06-05	07:50:00	4	29°06′22.42″	117°48′14.92″		304°
	2017-06-05	08:20:00	4	29°06′21.44″	117°48′14.79″	47.4	251°
	2017-06-05	08:50:00	4	29°06′21.61″	117°48′14.58″	52.4	218°
	2017-06-05	09:20:00	4	29°06′21.68″	117°48′14.61″	52.9	188°
	2017-06-05	09:25:00	4	29°06′17.30″	117°48′12.83″	50.7	315°
	2017-06-05	09:50:00	4	29°06′17.01″	117°48′12.43″		356°
	2017-06-05	09:58:00	4	29°06′22.52″	117°48′17.18″		175°
	2017-06-05	10:20:00	4	29°06′22.29″	117°48′14.44″	52.2	232°
	2017-06-05	10:27:00	4	29°06′20.29″	117°48′14.57″	49.8	292°
	2017-06-05	10:50:00	4	29°06′22.81″	117°48′16.54″		223°
	2017-06-05	10:55:00	4	29°06′23.71″	117°48′18.53″		244°
	2017-06-05	11:20:00	4	29°06′22.79″	117°48′16.68″		297°
	2017-06-05	11:28:00	4	29°06′21.78″	117°48′17.24″		/
	2017-06-05	16:00:00	4	29°06′21.63″	117°48′14.67″	52.4	237°
	2017-06-05	16:08:00	4	29°06′20.87″	117°48′14.64″	52.9	220°
	2017-06-05	16:30:00	4	29°06′21.90″	117°48′14.33″		234°
	2017-06-05	16:37:00	4	29°06′17.40″	117°48′12.86″	49	339°
	2017-06-05	17:00:00	4	29°06′17.20″	117°48′12.41″	51.4	323°
	2017-06-05	17:05:00	4	29°06′18.22″	117°48′10.59″	45.6	81°
	2017-06-05	17:30:00	4	29°06′17.86″	117°48′10.14″	47.9	85°
	2017-06-05	17:36:00	4	29°06′19.84″	117°48′10.43″		121°
	2017-06-05	18:00:00	4	29°06′20.47″	117°48′09.95″		136°
	2017-06-05	18:05:00	4	29°06′22.35″	117°48′11.98″		183°
	2017-06-05	18:30:00	4	29°06′21.72″	117°48′14.49″	55.5	188°
	2017-06-05	18:35:00	4	29°06′21.27″	117°48′14.68″	47.4	238°
	2017-06-10	07:15:00	4	29°6′11.92″	117°48′17.93″	55	/
	2017-06-10	07:20:00	4	29°6′10.79″	117°48′18.01″	53.1	/
	2017-06-10	07:38:00	4	29°6′5.13″	117°48′8.48″	58.2	/
	2017-06-10	07:42:00	4	29°6′4.51″	117°48′6.54″	56.9	/
	2017-06-10	07:57:00	4	29°6′8.64″	117°47′59.33″	56.1	/
	2017-06-10	08:00:00	4	29°6′10.39″	117°48′0.2″	53.3	/
	2017-06-10	08:10:00	4	29°6′18.34″	117°48′6.8″	57	98°
	2017-06-10	08:13:00	4	29°6′21.04″	117°48′10.34″	56	160°

## Sheet: 20175 original data
				receive signal site coordinate
	date	time	No.	N	E	elevation/m	angle of signal direction
	2017-05-19	17:05:00	5	29°6′18.19″	117°48′10.4″	57.1	83°
	2017-05-19	17:13:00	5	29°6′17.24″	117°48′9.47″	57	64°
	2017-05-19	17:45:00	5	29°6′17.24″	117°48′9.47″	57	60°
	2017-05-19	17:55:00	5	29°6′17.97″	117°48′8.06″	58	80°
	2017-05-19	18:30:00	5	29°6′16.87″	117°48′11.82″	57	15°
	2017-05-19	18:36:00	5	29°6′21.79″	117°48′14.47″	58	217°
	2017-05-20	15:21:00	5	29°6′14.24″	117°48′23.39″		/
	2017-05-20	15:28:00	5	29°6′13.64″	117°48′19.04″		/
	2017-05-20	15:35:00	5	29°6′16.71″	117°48′16.43″		306°
	2017-05-20	15:48:00	5	29°6′16.87″	117°48′11.82″	57	342°
	2017-05-20	16:18:00	5	29°6′17.24″	117°48′9.47″	57	53°
	2017-05-20	16:25:00	5	29°6′15.02″	117°48′9.47″	55	83°
	2017-05-20	17:05:00	5	29°6′15.02″	117°48′9.47″	55	25°
	2017-05-20	17:15:00	5	29°6′17.24″	117°48′9.47″	57	79°
	2017-05-20	17:35:00	5	29°6′18.34″	117°48′6.8″	57	87°
	2017-05-20	17:52:00	5	29°6′18.34″	117°48′6.8″	57	121°
	2017-05-20	17:57:00	5	29°6′21.04″	117°48′10.34″	56	180°
	2017-05-20	18:25:00	5	29°6′15.02″	117°48′9.47″	55	15°
	2017-05-20	18:35:00	5	29°6′16.87″	117°48′11.82″	57	342°
	2017-05-20	18:46:00	5	29°6′21.79″	117°48′14.47″	58	250°
	2017-05-21	07:32:00	5	29°6′16.87″	117°48′11.82″	57	340°
	2017-05-21	07:40:00	5	29°6′15.02″	117°48′9.47″	55	25°
	2017-05-21	07:45:00	5	29°6′17.24″	117°48′9.47″	57	16°
	2017-05-21	08:18:00	5	29°6′17.24″	117°48′9.47″	57	35°
	2017-05-21	08:23:00	5	29°6′17.97″	117°48′8.06″	58	38°
	2017-05-21	09:00:00	5	29°6′18.34″	117°48′6.8″	57	160°
	2017-05-21	09:08:00	5	29°6′21.04″	117°48′10.34″	56	109°
	2017-05-21	09:40:00	5	29°6′17.24″	117°48′9.47″	57	80°
	2017-05-21	09:48:00	5	29°6′15.02″	117°48′9.47″	55	13°
	2017-05-21	10:25:00	5	29°6′16.87″	117°48′11.82″	57	11°
	2017-05-21	10:30:00	5	29°6′14.69″	117°48′10.7″	56	8°
	2017-05-21	10:55:00	5	29°6′14.69″	117°48′10.7″	56	/
	2017-05-21	11:03:00	5	29°6′15.02″	117°48′9.47″	55	41°
	2017-05-21	11:08:00	5	29°6′17.24″	117°48′9.47″	57	17°
	2017-05-21	11:34:00	5	29°6′17.24″	117°48′9.47″	57	18°
	2017-05-21	11:35:00	5	29°6′17.97″	117°48′8.06″	58	39°
	2017-05-21	15:48:00	5	29°6′17.24″	117°48′9.47″	57	59°
	2017-05-21	15:53:00	5	29°6′15.02″	117°48′9.47″	55	38°
	2017-05-21	16:28:00	5	29°6′15.02″	117°48′9.47″	55	/
	2017-05-21	16:35:00	5	29°6′17.24″	117°48′9.47″	57	106°
	2017-05-21	17:00:00	5	29°6′21.04″	117°48′10.34″	56	105°
	2017-05-21	17:08:00	5	29°6′18.34″	117°48′6.8″	57	89°
	2017-05-21	17:15:00	5	29°6′17.97″	117°48′8.06″	58	75°
	2017-05-21	17:20:00	5	29°6′15.02″	117°48′9.47″	55	18°
	2017-05-21	17:50:00	5	29°6′15.02″	117°48′9.47″	55	35°
	2017-05-21	17:55:00	5	29°6′17.24″	117°48′9.47″	57	90°
	2017-05-21	18:00:00	5	29°6′17.97″	117°48′8.06″	58	10°
	2017-05-21	18:22:00	5	29°6′17.97″	117°48′8.06″	58	67°
	2017-05-21	18:28:00	5	29°6′18.34″	117°48′6.8″	57	101°
	2017-05-21	18:35:00	5	29°6′21.04″	117°48′10.34″	56	169°
	2017-05-22	15:50:00	5	29°6′17.97″	117°48′8.06″	58	114°
	2017-05-22	16:04:00	5	29°6′17.24″	117°48′9.47″	57	74°
	2017-05-22	16:33:00	5	29°6′15.02″	117°48′9.47″	55	3°
	2017-05-22	16:35:00	5	29°6′14.69″	117°48′10.7″	56	350°
	2017-05-22	16:43:00	5	29°6′16.87″	117°48′11.82″	57	4°
	2017-05-22	16:52:00	5	29°6′17.24″	117°48′9.47″	57	71°
	2017-05-22	17:26:00	5	29°6′17.97″	117°48′8.06″	58	81°
	2017-05-22	17:30:00	5	29°6′18.34″	117°48′6.8″	57	102°
	2017-05-22	17:35:00	5	29°6′21.04″	117°48′10.34″	56	154°
	2017-05-22	17:56:00	5	29°6′21.04″	117°48′10.34″	56	164°
	2017-05-22	18:05:00	5	29°6′18.34″	117°48′6.8″	57	64°
	2017-05-22	18:10:00	5	29°6′17.97″	117°48′8.06″	58	81°
	2017-05-22	18:15:00	5	29°6′17.24″	117°48′9.47″	57	86°
	2017-05-22	18:35:00	5	29°6′16.87″	117°48′11.82″	57	6°
	2017-05-22	18:40:00	5	29°6′21.79″	117°48′14.47″	58	218°
	2017-05-26	08:20:00	5	29°6′17.97″	117°48′8.06″	58	114°
	2017-05-26	08:30:00	5	29°6′15.02″	117°48′9.47″	55	15°
	2017-05-26	08:50:00	5	29°6′18.34″	117°48′6.8″	57	119°
	2017-05-26	08:55:00	5	29°6′17.97″	117°48′8.06″	58	196°
	2017-05-26	09:20:00	5	29°6′17.24″	117°48′9.47″	57	115°
	2017-05-26	09:25:00	5	29°6′15.02″	117°48′9.47″	55	206°
	2017-05-26	09:50:00	5	29°6′15.02″	117°48′9.47″	55	247°
	2017-05-26	09:53:00	5	29°6′17.24″	117°48′9.47″	57	212°
	2017-05-26	10:20:00	5	29°6′21.04″	117°48′10.34″	56	162°
	2017-05-26	10:25:00	5	29°6′21.88″	117°48′11.61″		196°
	2017-05-26	10:50:00	5	29°6′21.79″	117°48′14.47″	58	225°
	2017-05-26	10:56:00	5	29°6′16.87″	117°48′11.82″	57	216°
	2017-05-26	11:20:00	5	29°6′17.24″	117°48′9.47″	57	77°
	2017-05-26	11:25:00	5	29°6′15.02″	117°48′9.47″	55	78°
	2017-05-26	11:45:00	5	29°6′15.02″	117°48′9.47″	55	210°
	2017-05-26	11:48:00	5	29°6′17.24″	117°48′9.47″	57	98°
	2017-05-26	16:00:00	5	29°6′16.87″	117°48′11.82″	57	30°
	2017-05-26	16:06:00	5	29°6′21.79″	117°48′14.47″	58	213°
	2017-05-26	16:30:00	5	29°6′15.02″	117°48′9.47″	55	217°
	2017-05-26	16:35:00	5	29°6′17.97″	117°48′8.06″	58	104°
	2017-05-26	17:00:00	5	29°6′17.24″	117°48′9.47″	57	59°
	2017-05-26	17:05:00	5	29°6′15.02″	117°48′9.47″	55	40°
	2017-05-26	17:34:00	5	29°6′18.34″	117°48′6.8″	57	105°
	2017-05-26	17:40:00	5	29°6′17.97″	117°48′8.06″	58	56°
	2017-05-26	18:00:00	5	29°6′15.02″	117°48′9.47″	55	8°
	2017-05-26	18:08:00	5	29°6′14.69″	117°48′10.7″	56	25°
	2017-05-26	18:28:00	5	29°6′14.69″	117°48′10.7″	56	23°
	2017-05-26	18:30:00	5	29°6′16.87″	117°48′11.82″	57	18°
	2017-05-26	18:55:00	5	29°6′17.24″	117°48′9.47″	57	18°
	2017-05-26	19:00:00	5	29°6′21.79″	117°48′14.47″	58	222°
	2017-05-26	08:20:00	5	29°06′20.9″	117°48′14.5″	52.9	207°
	2017-05-26	08:50:00	5	29°06′19.1″	117°48′17.1″		161°
	2017-05-26	09:20:00	5	29°06′9.9″	117°48′15.4″		257°
	2017-05-26	09:50:00	5	29°06′10.3″	117°48′10.9″		325°
	2017-05-26	10:20:00	5	29°06′14.5″	117°48′9.0″		33°
	2017-05-26	10:50:00	5	29°06′15.5″	117°48′3.9″		126°
	2017-05-26	11:20:00	5	29°06′21.2″	117°48′10.8″		165°
	2017-05-26	11:50:00	5	29°06′12.3″	117°48′18.1″		/
	2017-05-26	16:00:00	5	29°06′12.8″	117°48′18.2″		327°
	2017-05-26	16:30:00	5	29°06′10.5″	117°48′10.3″		340°
	2017-05-26	17:00:00	5	29°06′16.3″	117°48′4.2″		80°
	2017-05-26	17:30:00	5	29°06′21.2″	117°48′10.3″		167°
	2017-05-26	18:00:00	5	29°06′21.9″	117°48′14.0″		159°
	2017-05-26	18:30:00	5	29°06′18.4″	117°48′18.1″		280°
	2017-05-26	19:00:00	5	29°06′12.3″	117°48′12.0″		348°
	2017-05-27	10:00:00	5	29°6′17.97″	117°48′8.06″	58	103°
	2017-05-27	10:10:00	5	29°6′18.34″	117°48′6.8″	57	48°
	2017-05-27	10:30:00	5	29°6′15.02″	117°48′9.47″	55	1°
	2017-05-27	10:38:00	5	29°6′14.69″	117°48′10.7″	56	28°
	2017-05-27	10:45:00	5	29°6′21.79″	117°48′14.47″	58	196°
	2017-05-27	11:00:00	5	29°6′21.04″	117°48′10.34″	56	165°
	2017-05-27	11:04:00	5	29°6′18.34″	117°48′6.8″	57	117°
	2017-05-27	16:20:00	5	29°6′15.02″	117°48′9.47″	55	40°
	2017-05-27	16:30:00	5	29°6′17.24″	117°48′9.47″	57	53°
	2017-05-27	16:46:00	5	29°6′17.24″	117°48′9.47″	57	104°
	2017-05-27	16:55:00	5	29°6′16.87″	117°48′11.82″	57	19°
	2017-05-27	17:20:00	5	29°6′15.02″	117°48′9.47″	55	41°
	2017-05-27	10:00:00	5	29°06′16.0″	117°48′9.0″		40°
	2017-05-27	10:30:00	5	29°06′13.1″	117°48′12.8″		353°
	2017-05-27	11:00:00	5	29°06′15″	117°48′16″		290°
	2017-05-27	11:10:00	5	29°06′20″	117°48′11″		159°
	2017-05-27	16:20:00	5	29°06′19″	117°48′15″	49.8	333°
	2017-05-27	16:50:00	5	29°06′20″	117°48′11″		167°
	2017-05-27	17:20:00	5	29°06′17″	117°48′09″	49.7	83°
	2017-05-27	17:50:00	5	29°06′15″	117°48′09″		60°
	2017-05-27	18:20:00	5	29°06′12″	117°48′12″		350°
	2017-05-27	18:50:00	5	29°06′14″	117°48′16″		66°
	2017-05-28	07:19:00	5	29°6′11.92″	117°48′17.93″	52.6	281°
	2017-05-28	07:30:00	5	29°6′9.11″	117°48′16.34″		276°
	2017-05-28	07:55:00	5	29°6′7.85″	117°48′12.59″	55.1	336°
	2017-05-28	08:10:00	5	29°6′10.25″	117°48′15.03″	51.5	292°
	2017-05-28	08:25:00	5	29°6′8.69″	117°48′10.42″	52.7	/
	2017-05-28	08:35:00	5	29°6′10.87″	117°48′13.16″	51.1	12°
	2017-05-28	08:50:00	5	29°6′13.28″	117°48′12.67″	52.7	184°
	2017-05-28	09:03:00	5	29°6′15.02″	117°48′9.47″	55	40°
	2017-05-28	09:11:00	5	29°6′16.87″	117°48′11.82″	57	9°
	2017-05-28	10:18:00	5	29°6′17.24″	117°48′9.47″	57	199°
	2017-05-28	10:25:00	5	29°6′15.02″	117°48′9.47″	55	126°
	2017-05-28	10:55:00	5	29°6′17.24″	117°48′9.47″	57	92°
	2017-05-28	11:03:00	5	29°6′21.04″	117°48′10.34″	56	190°
	2017-05-28	11:10:00	5	29°6′21.79″	117°48′14.47″	58	/
	2017-05-28	11:18:00	5	29°6′17.17″	117°48′14.24″	56.2	310°
	2017-05-28	11:28:00	5	29°6′11.92″	117°48′17.93″	55	328°
	2017-05-28	16:40:00	5	29°6′16.24″	117°48′16.88″	56	225°
	2017-05-28	16:40:00	5	29°6′14.75″	117°48′17.47′		281°
	2017-05-28	16:55:00	5	29°6′20.67″	117°48′13.06″	58.8	242°
	2017-05-28	16:55:00	5	29°6′20.27″	117°48′13.66″		357°
	2017-05-28	17:15:00	5	29°6′17.24″	117°48′9.47″	57	199°
	2017-05-28	17:15:00	5	29°6′19.27″	117°48′15.62″		210°
	2017-05-28	17:30:00	5	29°6′15.02″	117°48′9.47″	55	49°
	2017-05-28	17:30:00	5	29°6′22.02″	117°48′14.79″		248°
	2017-05-28	17:45:00	5	29°6′18.34″	117°48′6.8″	57	121°
	2017-05-28	17:45:00	5	29°6′22.89″	117°48′12.38″		307°
	2017-05-28	18:00:00	5	29°6′21.79″	117°48′14.47″	58	212°
	2017-05-28	18:00:00	5	29°6′18.39″	117°48′6.68″	57	77°
	2017-05-28	18:15:00	5	29°6′16.87″	117°48′11.82″	57	/
	2017-05-28	18:15:00	5	29°6′15.68″	117°48′3.94″		80°
	2017-05-28	18:30:00	5	29°6′14.69″	117°48′10.7″	56	35°
	2017-05-28	18:30:00	5	29°6′18.57″	117°48′7.43″		92°
	2017-05-31	07:10:00	5	29°6′11.92″	117°48′17.93″	55	315°
	2017-05-31	07:20:00	5	27°6′13″	117°48′14.7″		277°
	2017-05-31	07:35:00	5	29°6′16.87″	117°48′11.82″	57	282°
	2017-05-31	07:50:00	5	29°6′15.02″	117°48′9.47″	55	43°
	2017-05-31	07:58:00	5	29°6′17.24″	117°48′9.47″	57	80°
	2017-05-31	08:30:00	5	29°6′15.02″	117°48′9.47″	55	205°
	2017-05-31	08:35:00	5	29°6′17.24″	117°48′9.47″	57	197°
	2017-05-31	09:04:00	5	29°6′17.24″	117°48′9.47″	57	75°
	2017-05-31	09:15:00	5	29°6′15.02″	117°48′9.47″	55	45°
	2017-05-31	09:35:00	5	29°6′17.24″	117°48′9.47″	57	233°
	2017-05-31	09:40:00	5	29°6′17.97″	117°48′8.06″	58	111°
	2017-05-31	10:15:00	5	29°6′17.24″	117°48′9.47″	57	104°
	2017-05-31	10:20:00	5	29°6′17.97″	117°48′8.06″	58	116°
	2017-05-31	10:45:00	5	29°6′17.24″	117°48′9.47″	57	74°
	2017-05-31	10:50:00	5	29°6′17.97″	117°48′8.06″	58	178°
	2017-05-31	11:15:00	5	29°6′17.24″	117°48′9.47″	57	72°
	2017-05-31	11:20:00	5	29°6′17.97″	117°48′8.06″	58	89°
	2017-05-31	11:40:00	5	29°6′16.87″	117°48′11.82″	57	10°
	2017-05-31	11:45:00	5	29°6′21.79″	117°48′14.47″	58	220°
	2017-05-31	16:35:00	5	29°6′11.92″	117°48′17.93″	55	286°
	2017-05-31	16:45:00	5	29°6′14.4″	117°48′14.59″	55.2	314°
	2017-05-31	17:02:00	5	29°6′16.87″	117°48′11.82″	57	353°
	2017-05-31	17:12:00	5	29°6′21.79″	117°48′14.47″	58	/
	2017-05-31	17:20:00	5	29°6′21.04″	117°48′10.34″	56	208°
	2017-05-31	17:28:00	5	29°6′18.34″	117°48′6.8″	57	193°
	2017-05-31	17:40:00	5	29°6′18.34″	117°48′6.8″	57	168°
	2017-05-31	17:46:00	5	29°6′15.02″	117°48′9.47″	55	42°
	2017-05-31	18:04:00	5	29°6′14.69″	117°48′10.7″	56	280°
	2017-05-31	18:10:00	5	29°6′16.87″	117°48′11.82″	57	4°
	2017-05-31	18:25:00	5	29°6′21.79″	117°48′14.47″	58	260°
	2017-06-02	08:20:00	5	29°6′17.24″	117°48′9.47″	57	117°
	2017-06-02	08:35:00	5	29°6′15.02″	117°48′9.47″	55	225°
	2017-06-02	08:53:00	5	29°6′21.79″	117°48′14.47″	58	215°
	2017-06-02	09:03:00	5	29°6′21.04″	117°48′10.34″	56	160°
	2017-06-02	09:08:00	5	29°6′18.34″	117°48′6.8″	57	106°
	2017-06-02	09:34:00	5	29°6′17.24″	117°48′9.47″	57	121°
	2017-06-02	09:37:00	5	29°6′15.02″	117°48′9.47″	55	47°
	2017-06-02	09:42:00	5	29°6′16.87″	117°48′11.82″	57	294°
	2017-06-02	10:05:00	5	29°6′17.97″	117°48′8.06″	58	173°
	2017-06-02	10:10:00	5	29°6′17.24″	117°48′9.47″	57	117°
	2017-06-02	10:34:00	5	29°6′15.02″	117°48′9.47″	55	48°
	2017-06-02	10:37:00	5	29°6′17.24″	117°48′9.47″	57	193°
	2017-06-02	11:05:00	5	29°6′21.04″	117°48′10.34″	56	165°
	2017-06-02	11:10:00	5	29°6′21.79″	117°48′14.47″	58	165°
	2017-06-02	11:37:00	5	29°6′19.4″	117°48′11.3″	50	182°
	2017-06-02	11:45:00	5	29°6′21.79″	117°48′14.47″	58	294°
	2017-06-02	16:30:00	5	29°6′11.92″	117°48′17.93″	55	288°
	2017-06-02	16:40:00	5	29°6′18.57″	117°48′18.02″	51.6	/
	2017-06-02	16:48:00	5	29°6′21.79″	117°48′14.47″	58	/
	2017-06-02	17:08:00	5	29°6′17.24″	117°48′9.47″	57	84°
	2017-06-02	17:13:00	5	29°6′15.02″	117°48′9.47″	55	47°
	2017-06-02	17:40:00	5	29°6′17.24″	117°48′9.47″	57	56°
	2017-06-02	17:45:00	5	29°6′16.87″	117°48′11.82″	57	22°
	2017-06-02	18:10:00	5	29°6′21.04″	117°48′10.34″	56	344°
	2017-06-02	18:30:00	5	29°6′17.24″	117°48′9.47″	57	90°
	2017-06-02	18:40:00	5	29°6′16.87″	117°48′11.82″	57	48°
	2017-06-02	18:50:00	5	29°6′21.79″	117°48′14.47″	58	250°
	2017-06-02	08:05:00	5	29°06′18.39″	117°48′11.09″	54.4	92°
	2017-06-02	08:35:00	5	29°06′17.61″	117°48′13.62″	49.4	325°
	2017-06-02	09:05:00	5	29°06′17.4″	117°48′12.7″	49	344°
	2017-06-02	09:35:00	5	29°06′19.94″	117°48′13.97″	54	/
	2017-06-02	10:05:00	5	29°06′19.90″	117°48′13.24″	46.7	219°
	2017-06-02	10:35:00	5	29°06′18.69″	117°48′10.98″	50	/
	2017-06-02	11:05:00	5	29°06′18.52″	117°48′11.00″	52.2	102°
	2017-06-02	11:35:00	5	29°06′17.87″	117°48′10.10″	48.7	73°
	2017-06-02	16:40:00	5	29°06′15.4″	117°48′18.8″	52	140°
	2017-06-02	17:10:00	5	29°06′17.42″	117°48′12.59″	48.7	32°
	2017-06-02	17:40:00	5	29°06′19.68″	117°48′13.68″	45.1	8°
	2017-06-02	18:10:00	5	29°06′21.05″	117°48′14.91″	52.4	262°
	2017-06-02	18:40:00	5	29°06′17.89″	117°48′09.41″	50.4	72°
	2017-06-03	06:50:00	5	29°6′17.24″	117°48′9.47″	57	90°
	2017-06-03	07:20:00	5	29°6′17.24″	117°48′9.47″	57	80°
	2017-06-03	07:25:00	5	29°6′15.02″	117°48′9.47″	55	45°
	2017-06-03	07:50:00	5	29°6′14.69″	117°48′10.7″	56	10°
	2017-06-03	07:55:00	5	29°6′15.02″	117°48′9.47″	55	94°
	2017-06-03	08:20:00	5	29°6′17.24″	117°48′9.47″	57	193°
	2017-06-03	08:23:00	5	29°6′15.02″	117°48′9.47″	55	47°
	2017-06-03	08:50:00	5	29°6′14.69″	117°48′10.7″	56	44°
	2017-06-03	08:57:00	5	29°6′15.02″	117°48′9.47″	55	47°
	2017-06-03	09:20:00	5	29°6′15.02″	117°48′9.47″	55	2°
	2017-06-03	09:27:00	5	29°6′17.24″	117°48′9.47″	57	20°
	2017-06-03	09:50:00	5	29°6′17.24″	117°48′9.47″	57	20°
	2017-06-03	09:55:00	5	29°6′15.02″	117°48′9.47″	55	21°
	2017-06-03	10:20:00	5	29°6′14.69″	117°48′10.7″	56	333°
	2017-06-03	10:27:00	5	29°6′16.87″	117°48′11.82″	57	328°
	2017-06-03	10:50:00	5	29°6′17.24″	117°48′9.47″	57	20°
	2017-06-03	10:54:00	5	29°6′15.02″	117°48′9.47″	55	19°
	2017-06-03	11:20:00	5	29°6′14.69″	117°48′10.7″	56	0°
	2017-06-03	11:25:00	5	29°6′16.87″	117°48′11.82″	57	300°
	2017-06-03	11:50:00	5	29°6′17.97″	117°48′8.06″	58	49°
	2017-06-03	11:58:00	5	29°6′21.79″	117°48′14.47″	58	249°
	2017-06-03	16:20:00	5	27°6′19.08″	117°48′17.99″	53.7	311°
	2017-06-03	16:25:00	5	29°6′21.79″	117°48′14.47″	58	316°
	2017-06-03	16:55:00	5	29°6′21.04″	117°48′10.34″	56	/
	2017-06-03	17:00:00	5	29°6′18.34″	117°48′6.8″	57	100°
	2017-06-03	17:20:00	5	29°6′17.97″	117°48′8.06″	58	10°
	2017-06-03	17:25:00	5	29°6′17.24″	117°48′9.47″	57	18°
	2017-06-03	17:50:00	5	29°6′17.24″	117°48′9.47″	57	75°
	2017-06-03	17:55:00	5	29°6′15.02″	117°48′9.47″	55	14°
	2017-06-03	18:20:00	5	29°6′14.69″	117°48′10.7″	56	0°
	2017-06-03	18:25:00	5	29°6′16.87″	117°48′11.82″	57	328°
	2017-06-03	18:50:00	5	29°6′15.02″	117°48′9.47″	55	15°
	2017-06-03	18:52:00	5	29°6′17.24″	117°48′9.47″	57	17°
	2017-06-03	06:50:00	5	29°06′14.81″	117°48′09.48″	53.2	49°
	2017-06-03	07:20:00	5	29°06′18.13″	117°48′09.74″	54.7	32°
	2017-06-03	07:50:00	5	29°06′19.02″	117°48′13.79″	51.3	250°
	2017-06-03	08:20:00	5	29°06′20.72″	117°48′14.23″	53	312°
	2017-06-03	08:50:00	5	29°06′22.00″	117°48′14.55″	52.2	233°
	2017-06-03	09:20:00	5	29°06′20.85″	117°48′14.79″	52.9	317°
	2017-06-03	09:50:00	5	29°06′20.77″	117°48′14.93″	47.5	327°
	2017-06-03	10:20:00	5	29°06′17.68″	117°48′12.70″	47.9	/
	2017-06-03	10:50:00	5	29°06′19.96″	117°48′13.95″	54.1	270°
	2017-06-03	11:20:00	5	29°06′19.99″	117°48′14.02″	49.8	216°
	2017-06-03	11:50:00	5	29°06′15.34″	117°48′09.28″	47.3	/
	2017-06-03	16:20:00	5	29°06′16.07″	117°48′18.49″	54	335°
	2017-06-03	16:50:00	5	29°06′17.23″	117°48′12.60″	50	221°
	2017-06-03	17:20:00	5	29°06′19.12″	117°48′13.53″	52	293°
	2017-06-03	17:50:00	5	29°06′21.56″	117°48′14.95″	47.5	255°
	2017-06-03	18:20:00	5	29°06′21.97″	117°48′14.85″	49.8	192°
	2017-06-03	18:50:00	5	29°06′18.13″	117°48′09.87″	51.2	73°
	2017-06-04	06:50:00	5	29°6′19.08″	117°48′17.99″	53.7	312°
	2017-06-04	06:57:00	5	29°6′21.79″	117°48′14.47″	58	217°
	2017-06-04	07:20:00	5	29°6′21.04″	117°48′10.34″	56	204°
	2017-06-04	07:28:00	5	29°6′18.34″	117°48′6.8″	57	78°
	2017-06-04	07:50:00	5	29°6′15.02″	117°48′9.47″	55	10°
	2017-06-04	07:57:00	5	29°6′17.24″	117°48′9.47″	57	68°
	2017-06-04	08:20:00	5	29°6′17.24″	117°48′9.47″	57	201°
	2017-06-04	08:25:00	5	29°6′17.97″	117°48′8.06″	58	44°
	2017-06-04	08:50:00	5	29°6′17.24″	117°48′9.47″	57	107°
	2017-06-04	08:55:00	5	29°6′17.97″	117°48′8.06″	58	111°
	2017-06-04	09:20:00	5	29°6′17.24″	117°48′9.47″	57	21°
	2017-06-04	09:25:00	5	29°6′16.87″	117°48′11.82″	57	11°
	2017-06-04	09:55:00	5	29°6′17.24″	117°48′9.47″	57	67°
	2017-06-04	09:58:00	5	29°6′16.87″	117°48′11.82″	57	328°
	2017-06-04	10:20:00	5	29°6′17.24″	117°48′9.47″	57	117°
	2017-06-04	10:50:00	5	29°6′17.24″	117°48′9.47″	57	197°
	2017-06-04	11:20:00	5	29°6′21.79″	117°48′14.47″	58	207°
	2017-06-04	11:54:00	5	29°6′21.04″	117°48′10.34″	56	103°
	2017-06-04	15:30:00	5	29°6′19.08″	117°48′17.99″	53.7	290°
	2017-06-04	15:40:00	5	29°6′21.79″	117°48′14.47″	58	291°
	2017-06-04	16:00:00	5	29°6′21.04″	117°48′10.34″	56	349°
	2017-06-04	16:30:00	5	29°6′21.04″	117°48′10.34″	56	107°
	2017-06-04	17:00:00	5	29°6′17.24″	117°48′9.47″	57	202°
	2017-06-04	17:08:00	5	29°6′15.02″	117°48′9.47″	55	214°
	2017-06-04	17:30:00	5	29°6′14.69″	117°48′10.7″	56	320°
	2017-06-04	17:36:00	5	29°6′17.24″	117°48′9.47″	57	15°
	2017-06-04	18:00:00	5	29°6′14.69″	117°48′10.7″	56	6°
	2017-06-04	18:10:00	5	29°6′21.04″	117°48′10.34″	56	107°
	2017-06-04	18:30:00	5	29°6′21.04″	117°48′10.34″	56	107°
	2017-06-04	18:35:00	5	29°6′21.79″	117°48′14.47″	58	265°
	2017-06-04	06:50:00	5	29°06′16.11″	117°48′18.49″	50.1	302°
	2017-06-04	07:20:00	5	29°06′18.17″	117°48′10.43″	45.6	95°
	2017-06-04	07:50:00	5	29°06′18.53″	117°48′09.31″	55.2	231°
	2017-06-04	08:20:00	5	29°06′19.90″	117°48′14.03″	54.8	237°
	2017-06-04	08:50:00	5	29°06′21.77″	117°48′14.49″	51.8	235°
	2017-06-04	09:20:00	5	29°06′21.57″	117°48′14.63″	52.4	312°
	2017-06-04	09:50:00	5	29°06′21.72″	117°48′14.40″	55.5	304°
	2017-06-04	10:20:00	5	29°06′21.67″	117°48′14.53″	52.9	203°
	2017-06-04	10:50:00	5	29°06′17.18″	117°48′12.65″	51.4	352°
	2017-06-04	11:20:00	5	29°06′17.08″	117°48′12.83″	49.4	8°
	2017-06-04	11:50:00	5	29°06′21.36″	117°48′14.29″	47.4	292°
	2017-06-04	15:30:00	5	29°06′16.08″	117°48′18.54″	48.2	/
	2017-06-04	16:00:00	5	29°06′21.91″	117°48′14.47″	53.9	264°
	2017-06-04	16:30:00	5	29°06′21.56″	117°48′14.61″	55.2	286°
	2017-06-04	17:00:00	5	29°06′16.98″	117°48′12.14″	53.2	271°
	2017-06-04	17:30:00	5	29°06′17.30″	117°48′12.78″	50.7	310°
	2017-06-04	18:00:00	5	29°06′17.49″	117°48′13.54″	50.4	293°
	2017-06-04	18:30:00	5	29°06′17.91″	117°48′09.29″	49.7	31°
	2017-06-05	07:20:00	5	29°6′17.24″	117°48′9.47″	57	25°
	2017-06-05	07:26:00	5	29°6′17.97″	117°48′8.06″	58	48°
	2017-06-05	07:50:00	5	29°6′17.24″	117°48′9.47″	57	286°
	2017-06-05	07:55:00	5	29°6′19.51″	117°48′11.29″	57.6	260°
	2017-06-05	08:20:00	5	29°6′17.24″	117°48′9.47″	57	29°
	2017-06-05	08:25:00	5	29°6′17.97″	117°48′8.06″	58	50°
	2017-06-05	08:43:00	5	29°6′19.76″	117°48′8.42″	57.8	42°
	2017-06-05	08:47:00	5	29°6′21.04″	117°48′10.34″	56	25°
	2017-06-05	08:51:00	5	29°6′21.79″	117°48′14.47″	58	313°
	2017-06-05	07:20:00	5	29°06′13.12″	117°48′18.21″		267°
	2017-06-05	07:50:00	5	29°06′22.42″	117°48′14.92″		309°
	2017-06-05	08:20:00	5	29°06′21.44″	117°48′14.79″	47.4	227°
	2017-06-05	08:50:00	5	29°06′21.61″	117°48′14.58″	52.4	256°
	2017-06-05	09:20:00	5	29°06′21.68″	117°48′14.61″	52.9	251°
	2017-06-05	09:25:00	5	29°06′17.30″	117°48′12.83″	50.7	/
	2017-06-05	09:50:00	5	29°06′17.01″	117°48′12.43″		12°
	2017-06-05	09:58:00	5	29°06′22.52″	117°48′17.18″		302°
	2017-06-05	10:20:00	5	29°06′22.29″	117°48′14.44″	52.2	211°
	2017-06-05	10:27:00	5	29°06′20.29″	117°48′14.57″	49.8	321°
	2017-06-05	10:50:00	5	29°06′22.81″	117°48′16.54″		250°
	2017-06-05	10:55:00	5	29°06′23.71″	117°48′18.53″		342°
	2017-06-05	11:20:00	5	29°06′22.79″	117°48′16.68″		218°
	2017-06-05	11:28:00	5	29°06′21.78″	117°48′17.24″		242°
	2017-06-05	16:00:00	5	29°06′21.63″	117°48′14.67″	52.4	/
	2017-06-05	16:08:00	5	29°06′20.87″	117°48′14.64″	52.9	206°
	2017-06-05	16:30:00	5	29°06′21.90″	117°48′14.33″		326°
	2017-06-05	16:37:00	5	29°06′17.40″	117°48′12.86″	49	298°
	2017-06-05	17:00:00	5	29°06′17.20″	117°48′12.41″	51.4	307°
	2017-06-05	17:05:00	5	29°06′18.22″	117°48′10.59″	45.6	224°
	2017-06-05	17:30:00	5	29°06′17.86″	117°48′10.14″	47.9	232°
	2017-06-05	17:36:00	5	29°06′19.84″	117°48′10.43″		/
	2017-06-05	18:00:00	5	29°06′20.47″	117°48′09.95″		170°
	2017-06-05	18:05:00	5	29°06′22.35″	117°48′11.98″		198°
	2017-06-05	18:30:00	5	29°06′21.72″	117°48′14.49″	55.5	213°
	2017-06-05	18:35:00	5	29°06′21.27″	117°48′14.68″	47.4	254°
	2017-06-10	07:15:00	5	29°6′11.92″	117°48′17.93″	55	322°
	2017-06-10	07:20:00	5	29°6′10.79″	117°48′18.01″	53.1	303°
	2017-06-10	07:38:00	5	29°6′5.13″	117°48′8.48″	58.2	355°
	2017-06-10	07:42:00	5	29°6′4.51″	117°48′6.54″	56.9	18°
	2017-06-10	07:57:00	5	29°6′8.64″	117°47′59.33″	56.1	88°
	2017-06-10	08:00:00	5	29°6′10.39″	117°48′0.2″	53.3	100°
	2017-06-10	08:10:00	5	29°6′18.34″	117°48′6.8″	57	188°
	2017-06-10	08:13:00	5	29°6′21.04″	117°48′10.34″	56	203°
	2017-06-10	09:00:00	5	29°6′17.97″	117°48′8.06″	58	190°
	2017-06-10	09:02:00	5	29°6′17.24″	117°48′9.47″	57	233°
	2017-06-10	09:30:00	5	29°6′17.24″	117°48′9.47″	57	219°
	2017-06-10	09:33:00	5	29°6′15.02″	117°48′9.47″	55	257°
	2017-06-10	10:00:00	5	29°6′21.79″	117°48′14.47″	58	231°
	2017-06-10	10:03:00	5	29°6′16.87″	117°48′11.82″	57	256°
	2017-06-10	10:30:00	5	29°6′12.89″	117°48′7.27″	51.2	267°
	2017-06-10	10:32:00	5	29°6′12.58″	117°48′7.38″	53.9	277°
	2017-06-10	11:00:00	5	29°6′17.24″	117°48′9.47″	57	266°
	2017-06-10	11:03:00	5	29°6′16.88″	117°48′7.2″	59.1	238°
	2017-06-10	11:30:00	5	29°6′17.24″	117°48′9.47″	57	219°
	2017-06-10	11:32:00	5	29°6′17.97″	117°48′8.06″	58	200°
	2017-06-10	16:35:00	5	29°6′11.92″	117°48′17.93″	55	282°
	2017-06-10	16:38:00	5	29°6′10.79″	117°48′18.01″	53.1	288°
	2017-06-10	16:56:00	5	29°6′5.13″	117°48′8.48″	58.2	6°
	2017-06-10	17:00:00	5	29°6′4.51″	117°48′6.54″	56.9	15°
	2017-06-10	17:10:00	5	29°6′3″	117°47′59.69″	55.4	75°
	2017-06-10	17:12:00	5	29°6′5.56″	117°47′59.08″	61.1	99°
	2017-06-10	17:37:00	5	29°6′18.34″	117°48′6.8″	57	186°
	2017-06-10	17:41:00	5	29°6′21.04″	117°48′10.34″	56	210°
	2017-06-10	18:00:00	5	29°6′17.97″	117°48′8.06″	58	215°
	2017-06-10	18:04:00	5	29°6′17.24″	117°48′9.47″	57	217°
	2017-06-10	18:30:00	5	29°6′17.24″	117°48′9.47″	57	/
	2017-06-10	18:34:00	5	29°6′15.02″	117°48′9.47″	55	256°
	2017-06-13	15:14:00	5	29°6′11.92″	117°48′17.93″	55	/
	2017-06-13	15:26:00	5	29°6′5.28″	117°48′8.56″	55.8	292°
	2017-06-13	15:29:00	5	29°6′4.58″	117°48′6.5″	60.9	280°
	2017-06-13	15:44:00	5	29°5′59.88″	117°48′3.86″	61.3	activity in this site
	2017-06-13	15:45~16:55	5	29°5′59.88″	117°48′3.86″	61.3	still activity in this site
	2017-06-13	17:05:00	5	29°5′59.97″	117°48′0.83″	61	38°
	2017-06-13	17:07:00	5	29°6′2.14″	117°48′0.1″	59.4	74°
	2017-06-13	17:30:00	5	29°6′18.34″	117°48′6.8″	57	201°
	2017-06-13	17:31:00	5	29°6′17.97″	117°48′8.06″	58	219°
	2017-06-16	07:41:00	5	29°6′4.52″	117°48′6.55″	57	12°
	2017-06-16	07:44:00	5	29°6′1.73″	117°48′5.57″	54.8	16°
	2017-06-16	07:58:00	5	29°6′1.46″	117°48′0.34″	57.1	36°
	2017-06-16	08:02:00	5	29°6′4.12″	117°47′59.47″	57.5	51°
	2017-06-19	08:12:00	5	29°5′59.15″	117°48′2.43″	59.9	154°
	2017-06-19	08:17:00	5	29°5′57.29″	117°48′1.24″	58.1	176°
	2017-06-19	08:26:00	5	29°5′54.81″	117°48′3.4″	59.5	224°
	2017-06-19	08:30:00	5	29°5′51.87″	117°48′2.03″	59.3	260°
	2017-06-19	08:38:00	5	29°5′49.47″	117°47′58.46″	59.1	217°
	2017-06-19	08:41:00	5	29°5′47.47″	117°48′0.08″	57.6	252°
	2017-06-19	08:50:00	5	29°5′44.18″	117°47′55.68″	52.4	activity in this site
	2017-06-19	09:00:00	5	29°5′44.18″	117°47′55.68″	52.4	activity in this site
	2017-06-19	9:30-9:50	5	29°5′42.82″	117°47′54.62″	57.3	still activity in this site
	2017-06-20	07:50:00	5	29°6′5.08″	117°48′8.55″	58.9	75°
	2017-06-20	07:55:00	5	29°6′5.27″	117°48′13.75″	64.4	30°
	2017-06-20	08:24:00	5	29°5′56.95″	117°48′4.12″	59.2	328°
	2017-06-20	08:28:00	5	29°5′53.76″	117°48′2.78″	58	228°
	2017-06-20	08:31:00	5	29°5′51.81″	117°48′1.93″	57.4	235°
	2017-06-20	08:46:00	5	29°5′45.43″	117°47′53.98″	56.6	292°
	2017-06-20	08:49:00	5	29°5′45.47″	117°47′55.04″	63	277°
	2017-06-20	09:09:00	5	29°5′59.12″	117°48′0.91″	54.3	233°
	2017-06-20	09:12:00	5	29°6′1.13″	117°48′0.32″	55.5	216°
	2017-06-20	16:34:00	5	29°5′57.27″	117°48′4.22″	63.3	236°
	2017-06-20	16:37:00	5	29°5′59.16″	117°48′0.71″	63.5	249°

## Sheet: 20171 processed data
	date	time	Y	X
	2017-05-09	16:47:00	29.1048	117.803
	2017-05-09	18:22:00	29.1053	117.803
	2017-05-10	06:51:00	29.106	117.804
	2017-05-10	08:47:00	29.1053	117.803
	2017-05-10	11:48:00	29.1051	117.803
	2017-05-10	15:20:00	29.1051	117.803
	2017-05-10	15:36:00	29.1051	117.803
	2017-05-10	18:00:00	29.105	117.803
	2017-05-10	18:30:00	29.1051	117.803
	2017-05-11	06:50:00	29.1051	117.803
	2017-05-11	11:25:00	29.1051	117.803
	2017-05-11	14:35:00	29.1051	117.803
	2017-05-11	16:16:00	29.1051	117.803
	2017-05-11	18:15:00	29.1051	117.803
	2017-05-11	18:25:00	29.1051	117.803
	2017-05-12	08:59:00	29.1043	117.802
	2017-05-12	09:10:00	29.1051	117.803
	2017-05-12	09:43:00	29.1067	117.804
	2017-05-12	14:15:00	29.1046	117.803
	2017-05-12	14:56:00	29.106	117.805
	2017-05-12	15:40:00	29.1048	117.803
	2017-05-12	16:30:00	29.1043	117.802
	2017-05-12	17:15:00	29.1059	117.803
	2017-05-12	17:50:00	29.1046	117.803
	2017-05-13	07:20:00	29.1053	117.803
	2017-05-13	08:00:00	29.1059	117.803
	2017-05-13	09:04:00	29.1042	117.803
	2017-05-13	09:40:00	29.1041	117.802
	2017-05-13	10:27:00	29.1052	117.802
	2017-05-13	10:35:00	29.1052	117.802
	2017-05-13	11:15:00	29.1059	117.803
	2017-05-13	14:50:00	29.1051	117.803
	2017-05-13	15:50:00	29.1051	117.803
	2017-05-13	16:40:00	29.1059	117.802
	2017-05-14	18:20:00	29.1053	117.802
	2017-05-15	16:20:00	29.1053	117.805
	2017-05-15	17:35:00	29.1046	117.803
	2017-05-15	17:45:00	29.1041	117.803
	2017-05-16	08:30:00	29.1051	117.803
	2017-05-16	16:00:00	29.1051	117.803
	2017-05-16	16:30:00	29.1039	117.806
	2017-05-18	16:10:00	29.1046	117.803
	2017-05-18	16:55:00	29.1041	117.802
	2017-05-18	17:50:00	29.1052	117.802
	2017-05-18	18:25:00	29.1053	117.802
	2017-05-18	18:40:00	29.1049	117.803
	2017-05-18	18:50:00	29.1053	117.804
	2017-05-19	10:16:00	29.1051	117.803
	2017-05-19	10:55:00	29.1052	117.803
	2017-05-19	11:23:00	29.1046	117.802
	2017-05-19	11:34:00	29.1038	117.803
	2017-05-19	17:05:00	29.105	117.803
	2017-05-19	17:45:00	29.1049	117.804
	2017-05-19	18:30:00	29.106	117.802
	2017-05-20	15:35:00	29.1051	117.804
	2017-05-20	16:18:00	29.1065	117.804
	2017-05-20	17:05:00	29.1046	117.802
	2017-05-20	17:35:00	29.1051	117.802
	2017-05-20	17:52:00	29.1062	117.803
	2017-05-20	18:25:00	29.1032	117.802
	2017-05-20	18:35:00	29.1058	117.804
	2017-05-21	07:32:00	29.1055	117.802
	2017-05-21	07:40:00	29.1047	117.802
	2017-05-21	08:18:00	29.1048	117.803
	2017-05-21	09:00:00	29.1058	117.803
	2017-05-21	09:40:00	29.1048	117.803
	2017-05-21	10:55:00	29.1042	117.803
	2017-05-21	11:03:00	29.1042	117.802
	2017-05-21	11:34:00	29.1051	117.802
	2017-05-21	15:48:00	29.1042	117.803
	2017-05-21	16:28:00	29.1046	117.803
	2017-05-21	17:15:00	29.1051	117.802
	2017-05-21	17:50:00	29.1048	117.803
	2017-05-21	17:55:00	29.1047	117.802
	2017-05-21	18:22:00	29.1049	117.802
	2017-05-21	18:28:00	29.1043	117.803
	2017-05-22	15:50:00	29.1058	117.803
	2017-05-22	16:33:00	29.104	117.803
	2017-05-22	16:43:00	29.1047	117.803
	2017-05-22	17:56:00	29.105	117.804
	2017-05-22	18:10:00	29.1047	117.802
	2017-05-22	18:35:00	29.1048	117.803
	2017-05-26	08:05:00	29.1053	117.802
	2017-05-26	09:20:00	29.105	117.803
	2017-05-26	09:50:00	29.1042	117.803
	2017-05-26	11:20:00	29.1042	117.803
	2017-05-26	11:45:00	29.1047	117.802
	2017-05-26	16:00:00	29.1039	117.804
	2017-05-26	16:00:00	29.1047	117.801
	2017-05-26	16:30:00	29.1052	117.804
	2017-05-26	17:00:00	29.1052	117.803
	2017-05-26	17:34:00	29.105	117.802
	2017-05-26	18:00:00	29.1042	117.803
	2017-05-26	18:30:00	29.1052	117.805
	2017-05-26	18:55:00	29.1054	117.805
	2017-05-27	10:00:00	29.1047	117.803
	2017-05-27	10:30:00	29.1042	117.803
	2017-05-27	10:38:00	29.1036	117.805
	2017-05-27	11:00:00	29.1044	117.803
	2017-05-27	11:04:00	29.1059	117.803
	2017-05-27	16:20:00	29.1057	117.802
	2017-05-27	16:30:00	29.1048	117.803
	2017-05-27	16:46:00	29.1049	117.803
	2017-05-28	09:03:00	29.1057	117.802
	2017-05-28	10:18:00	29.1044	117.803
	2017-05-28	16:40:00	29.104	117.805
	2017-05-28	16:55:00	29.1056	117.804
	2017-05-28	17:15:00	29.1036	117.804
	2017-05-28	17:30:00	29.104	117.803
	2017-05-28	18:15:00	29.105	117.802
	2017-05-31	07:50:00	29.1034	117.801
	2017-05-31	09:04:00	29.1041	117.802
	2017-05-31	10:45:00	29.1053	117.803
	2017-05-31	11:40:00	29.104	117.805
	2017-05-31	17:02:00	29.1053	117.803
	2017-05-31	18:04:00	29.1047	117.803
	2017-06-02	08:05:00	29.1048	117.802
	2017-06-02	09:37:00	29.105	117.801
	2017-06-02	10:05:00	29.105	117.802
	2017-06-02	10:05:00	29.1053	117.803
	2017-06-02	11:05:00	29.1054	117.803
	2017-06-02	11:37:00	29.1042	117.805
	2017-06-02	17:08:00	29.1047	117.803
	2017-06-02	17:10:00	29.1045	117.802
	2017-06-02	17:40:00	29.1055	117.803
	2017-06-02	18:30:00	29.1048	117.803
	2017-06-02	18:40:00	29.1047	117.803
	2017-06-03	07:20:00	29.1049	117.803
	2017-06-03	07:20:00	29.1052	117.803
	2017-06-03	07:50:00	29.1053	117.804
	2017-06-03	08:20:00	29.1052	117.801
	2017-06-03	08:20:00	29.1054	117.802
	2017-06-03	08:50:00	29.1041	117.803
	2017-06-03	09:20:00	29.1052	117.804
	2017-06-03	09:50:00	29.106	117.804
	2017-06-03	10:20:00	29.1042	117.802
	2017-06-03	10:20:00	29.1047	117.803
	2017-06-03	10:50:00	29.1049	117.802
	2017-06-03	10:50:00	29.1054	117.803
	2017-06-03	11:20:00	29.1041	117.804
	2017-06-03	11:20:00	29.1046	117.804
	2017-06-03	11:50:00	29.106	117.804
	2017-06-03	16:50:00	29.106	117.803
	2017-06-03	17:20:00	29.1051	117.804
	2017-06-03	17:50:00	29.106	117.804
	2017-06-03	18:20:00	29.105	117.803
	2017-06-03	18:50:00	29.1044	117.803
	2017-06-03	18:50:00	29.1053	117.802
	2017-06-04	06:50:00	29.1058	117.803
	2017-06-04	07:50:00	29.1046	117.802
	2017-06-04	08:20:00	29.1049	117.803
	2017-06-04	08:20:00	29.1051	117.803
	2017-06-04	08:50:00	29.1047	117.802
	2017-06-04	09:20:00	29.106	117.804
	2017-06-04	09:55:00	29.1032	117.805
	2017-06-04	10:20:00	29.1042	117.804
	2017-06-04	10:50:00	29.1057	117.804
	2017-06-04	11:20:00	29.1047	117.804
	2017-06-04	15:30:00	29.1054	117.804
	2017-06-04	17:00:00	29.1052	117.803
	2017-06-04	17:00:00	29.1042	117.803
	2017-06-04	18:00:00	29.1047	117.804
	2017-06-05	07:20:00	29.1034	117.801
	2017-06-05	07:20:00	29.1035	117.802
	2017-06-05	07:50:00	29.1049	117.802
	2017-06-05	07:50:00	29.1053	117.803
	2017-06-05	08:20:00	29.1048	117.803
	2017-06-05	08:50:00	29.106	117.804
	2017-06-05	10:50:00	29.1064	117.805
	2017-06-05	16:00:00	29.1055	117.804
	2017-06-05	16:30:00	29.1054	117.804
	2017-06-05	17:00:00	29.1051	117.803
	2017-06-05	17:30:00	29.1056	117.803
	2017-06-05	18:00:00	29.1063	117.804
	2017-06-05	18:30:00	29.106	117.804
	2017-06-10	08:29:00	29.1051	117.803

## Sheet: 20172 processed data
	date	time	Y	X
	2017-05-09	16:43:00	29.1046	117.802
	2017-05-09	17:27:00	29.1051	117.802
	2017-05-10	11:48:00	29.1051	117.803
	2017-05-10	15:20:00	29.1051	117.803
	2017-05-10	15:36:00	29.1051	117.803
	2017-05-10	18:30:00	29.1051	117.803
	2017-05-11	06:50:00	29.1051	117.803
	2017-05-11	11:25:00	29.1051	117.803
	2017-05-11	14:35:00	29.1051	117.803
	2017-05-11	16:16:00	29.1051	117.803
	2017-05-11	18:15:00	29.1052	117.804
	2017-05-13	09:04:00	29.1058	117.803
	2017-05-13	09:40:00	29.1051	117.803
	2017-05-13	09:45:00	29.1051	117.803
	2017-05-13	14:50:00	29.1051	117.803
	2017-05-13	15:50:00	29.1051	117.803
	2017-05-14	17:05:00	29.105	117.802
	2017-05-15	17:00:00	29.1046	117.802
	2017-05-15	17:35:00	29.1049	117.803
	2017-05-15	17:45:00	29.105	117.803
	2017-05-16	08:30:00	29.1051	117.803
	2017-05-16	16:00:00	29.1051	117.803
	2017-05-18	18:50:00	29.1053	117.803
	2017-05-19	10:16:00	29.1053	117.803
	2017-05-19	10:55:00	29.1053	117.803
	2017-05-19	17:05:00	29.1043	117.803
	2017-05-20	15:35:00	29.1051	117.804
	2017-05-20	16:18:00	29.1049	117.803
	2017-05-21	07:32:00	29.1044	117.803
	2017-05-21	07:40:00	29.1042	117.803
	2017-05-21	08:18:00	29.1058	117.802
	2017-05-21	09:40:00	29.1041	117.803
	2017-05-21	10:25:00	29.1043	117.803
	2017-05-21	11:34:00	29.1044	117.802
	2017-05-26	10:20:00	29.106	117.803
	2017-05-26	10:50:00	29.1049	117.803
	2017-05-27	10:45:00	29.1067	117.804
	2017-05-27	17:20:00	29.1043	117.802
	2017-05-27	18:20:00	29.1042	117.804
	2017-05-28	16:40:00	29.1045	117.805
	2017-05-28	17:15:00	29.1056	117.804
	2017-05-31	11:15:00	29.1042	117.802
	2017-06-02	10:05:00	29.1043	117.805
	2017-06-02	10:05:00	29.1059	117.803
	2017-06-02	10:34:00	29.1034	117.804
	2017-06-02	11:05:00	29.1059	117.803
	2017-06-02	11:35:00	29.1051	117.803
	2017-06-03	06:50:00	29.1049	117.803
	2017-06-03	07:50:00	29.1055	117.803
	2017-06-03	08:50:00	29.1062	117.804
	2017-06-03	09:50:00	29.1039	117.803
	2017-06-03	10:20:00	29.1047	117.803
	2017-06-03	11:20:00	29.1048	117.803
	2017-06-03	11:50:00	29.1051	117.803
	2017-06-03	18:20:00	29.1053	117.805
	2017-06-03	18:25:00	29.1044	117.803
	2017-06-04	08:20:00	29.1055	117.803
	2017-06-04	09:20:00	29.1051	117.804
	2017-06-04	09:58:00	29.1059	117.803
	2017-06-04	10:50:00	29.1048	117.804
	2017-06-04	17:00:00	29.1047	117.803
	2017-06-04	18:00:00	29.1037	117.804
	2017-06-05	07:50:00	29.1053	117.804
	2017-06-05	08:50:00	29.106	117.804
	2017-06-05	09:50:00	29.1044	117.802
	2017-06-05	10:20:00	29.1062	117.804
	2017-06-05	16:00:00	29.1059	117.804
	2017-06-05	16:30:00	29.1036	117.804
	2017-06-05	17:00:00	29.1048	117.803
	2017-06-05	17:30:00	29.1057	117.803
	2017-06-05	18:00:00	29.1061	117.803
	2017-06-05	18:30:00	29.106	117.804

## Sheet: 20173 processed data
	date	time	Y	X
	2017-05-10	08:52:00	29.1052	117.803
	2017-05-10	08:54:00	29.105	117.803
	2017-05-10	09:34:00	29.1056	117.802
	2017-05-10	11:48:00	29.1051	117.803
	2017-05-10	14:19:00	29.1051	117.803
	2017-05-10	15:20:00	29.1051	117.803
	2017-05-10	16:16:00	29.1051	117.803
	2017-05-10	16:24:00	29.104	117.802
	2017-05-10	17:02:00	29.1047	117.801
	2017-05-10	17:11:00	29.1062	117.803
	2017-05-11	06:50:00	29.1051	117.803
	2017-05-11	10:28:00	29.1053	117.802
	2017-05-11	11:25:00	29.1051	117.803
	2017-05-11	16:16:00	29.1051	117.803
	2017-05-11	18:15:00	29.1051	117.803
	2017-05-11	18:25:00	29.1055	117.804
	2017-05-12	08:59:00	29.1042	117.803
	2017-05-12	09:43:00	29.1057	117.804
	2017-05-12	14:15:00	29.1061	117.803
	2017-05-12	14:56:00	29.105	117.802
	2017-05-12	17:50:00	29.1044	117.803
	2017-05-13	07:20:00	29.105	117.803
	2017-05-13	08:00:00	29.1047	117.802
	2017-05-13	09:04:00	29.1051	117.802
	2017-05-13	09:40:00	29.1058	117.803
	2017-05-13	10:27:00	29.1058	117.803
	2017-05-13	10:40:00	29.1051	117.803
	2017-05-13	11:15:00	29.1044	117.802
	2017-05-13	14:50:00	29.1051	117.803
	2017-05-13	15:50:00	29.1051	117.803
	2017-05-13	16:40:00	29.1041	117.803
	2017-05-13	18:05:00	29.1041	117.802
	2017-05-14	17:05:00	29.1047	117.803
	2017-05-14	17:45:00	29.1058	117.803
	2017-05-15	16:20:00	29.1054	117.802
	2017-05-15	17:00:00	29.1048	117.803
	2017-05-15	17:35:00	29.1055	117.803
	2017-05-15	17:45:00	29.1043	117.803
	2017-05-16	08:05:00	29.106	117.803
	2017-05-16	09:00:00	29.1048	117.803
	2017-05-16	16:00:00	29.1051	117.803
	2017-05-16	16:30:00	29.1058	117.803
	2017-05-16	17:12:00	29.1037	117.801
	2017-05-18	15:15:00	29.1044	117.803
	2017-05-18	15:25:00	29.103	117.804
	2017-05-18	16:10:00	29.1049	117.802
	2017-05-18	16:55:00	29.1044	117.803
	2017-05-18	17:50:00	29.102	117.803
	2017-05-18	18:25:00	29.1057	117.802
	2017-05-18	18:40:00	29.1054	117.803
	2017-05-18	18:50:00	29.1054	117.803
	2017-05-19	10:55:00	29.1044	117.802
	2017-05-19	11:23:00	29.105	117.801
	2017-05-19	11:34:00	29.1048	117.802
	2017-05-19	17:05:00	29.105	117.803
	2017-05-19	17:45:00	29.102	117.802
	2017-05-19	18:30:00	29.1064	117.803
	2017-05-20	15:35:00	29.1046	117.803
	2017-05-20	17:05:00	29.104	117.802
	2017-05-20	17:15:00	29.1065	117.803
	2017-05-20	18:25:00	29.1043	117.803
	2017-05-20	18:35:00	29.106	117.804
	2017-05-21	07:32:00	29.105	117.803
	2017-05-21	07:40:00	29.1049	117.803
	2017-05-21	09:00:00	29.1052	117.803
	2017-05-21	09:40:00	29.1043	117.803
	2017-05-21	10:25:00	29.1047	117.804
	2017-05-21	11:03:00	29.1042	117.803
	2017-05-21	11:34:00	29.1047	117.802
	2017-05-21	16:28:00	29.105	117.801
	2017-05-21	17:00:00	29.1057	117.805
	2017-05-21	17:15:00	29.1034	117.802
	2017-05-21	17:50:00	29.1036	117.802
	2017-05-21	18:00:00	29.105	117.802
	2017-05-22	15:50:00	29.1047	117.803
	2017-05-22	16:33:00	29.1043	117.802
	2017-05-22	16:43:00	29.1045	117.803
	2017-05-22	17:26:00	29.1046	117.802
	2017-05-22	17:56:00	29.105	117.802
	2017-05-22	18:15:00	29.105	117.803
	2017-05-26	08:20:00	29.106	117.803
	2017-05-26	08:50:00	29.105	117.805
	2017-05-26	08:50:00	29.1051	117.802
	2017-05-26	09:50:00	29.103	117.803
	2017-05-26	09:50:00	29.1024	117.801
	2017-05-26	10:20:00	29.1058	117.803
	2017-05-26	10:50:00	29.1045	117.801
	2017-05-26	11:20:00	29.1057	117.804
	2017-05-26	11:20:00	29.1057	117.804
	2017-05-26	16:00:00	29.1049	117.804
	2017-05-26	16:30:00	29.1037	117.801
	2017-05-26	17:00:00	29.1045	117.802
	2017-05-26	17:00:00	29.1045	117.802
	2017-05-26	17:34:00	29.105	117.802
	2017-05-26	18:00:00	29.106	117.803
	2017-05-26	18:30:00	29.1045	117.803
	2017-05-26	18:30:00	29.1044	117.803
	2017-05-27	10:00:00	29.1047	117.802
	2017-05-27	10:00:00	29.105	117.801
	2017-05-27	10:30:00	29.1021	117.804
	2017-05-27	16:20:00	29.1042	117.803
	2017-05-27	16:30:00	29.1048	117.803
	2017-05-27	16:50:00	29.1055	117.804
	2017-05-27	17:20:00	29.1043	117.803
	2017-05-27	18:20:00	29.1043	117.804
	2017-05-28	08:10:00	29.1023	117.803
	2017-05-28	08:35:00	29.1035	117.803
	2017-05-28	09:03:00	29.1043	117.802
	2017-05-28	10:18:00	29.1041	117.803
	2017-05-28	10:55:00	29.1045	117.803
	2017-05-28	11:10:00	29.1061	117.804
	2017-05-28	11:18:00	29.1052	117.804
	2017-05-28	16:40:00	29.1036	117.804
	2017-05-28	16:55:00	29.106	117.804
	2017-05-28	17:15:00	29.1056	117.804
	2017-05-28	17:45:00	29.1061	117.806
	2017-05-28	18:00:00	29.107	117.804
	2017-05-28	18:30:00	29.1051	117.803
	2017-05-31	07:35:00	29.1042	117.803
	2017-05-31	08:30:00	29.1049	117.803
	2017-05-31	09:04:00	29.1052	117.802
	2017-05-31	10:15:00	29.105	117.802
	2017-05-31	10:45:00	29.105	117.802
	2017-05-31	11:15:00	29.105	117.802
	2017-05-31	11:40:00	29.1058	117.803
	2017-05-31	17:02:00	29.104	117.801
	2017-05-31	17:20:00	29.1045	117.802
	2017-05-31	18:04:00	29.1044	117.804
	2017-05-31	18:10:00	29.1051	117.802
	2017-06-02	08:53:00	29.1061	117.803
	2017-06-03	07:50:00	29.1059	117.803
	2017-06-03	08:20:00	29.1037	117.803
	2017-06-03	08:23:00	29.1037	117.803
	2017-06-03	09:20:00	29.1058	117.804
	2017-06-03	10:50:00	29.1056	117.804
	2017-06-03	11:20:00	29.1055	117.804
	2017-06-03	16:25:00	29.1064	117.803
	2017-06-03	17:50:00	29.106	117.804
	2017-06-03	18:20:00	29.1057	117.804
	2017-06-04	07:20:00	29.1056	117.803
	2017-06-04	08:20:00	29.1059	117.804
	2017-06-04	09:20:00	29.1061	117.804
	2017-06-04	09:50:00	29.106	117.804
	2017-06-04	11:50:00	29.1064	117.804
	2017-06-04	16:00:00	29.1053	117.804
	2017-06-04	16:30:00	29.1069	117.804
	2017-06-04	18:10:00	29.1058	117.803
	2017-06-04	18:30:00	29.106	117.803
	2017-06-05	08:50:00	29.1061	117.804
	2017-06-05	10:20:00	29.1053	117.804
	2017-06-05	11:20:00	29.106	117.805
	2017-06-05	16:00:00	29.1061	117.804
	2017-06-05	18:30:00	29.106	117.804
	2017-06-10	09:00:00	29.1049	117.802
	2017-06-10	09:30:00	29.1044	117.802
	2017-06-10	09:56:00	29.1051	117.803

## Sheet: 20174 processed data
	date	time	Y	X
	2017-05-10	11:48:00	29.1051	117.803
	2017-05-10	14:19:00	29.1051	117.803
	2017-05-10	15:20:00	29.1051	117.803
	2017-05-10	15:36:00	29.1051	117.803
	2017-05-10	17:11:00	29.1056	117.803
	2017-05-10	18:00:00	29.1055	117.802
	2017-05-10	18:30:00	29.1051	117.803
	2017-05-11	06:50:00	29.1051	117.803
	2017-05-11	11:25:00	29.1051	117.803
	2017-05-11	14:35:00	29.1051	117.803
	2017-05-11	16:16:00	29.1051	117.803
	2017-05-11	16:30:00	29.1048	117.801
	2017-05-11	18:15:00	29.1051	117.803
	2017-05-12	09:10:00	29.1048	117.803
	2017-05-12	14:15:00	29.1047	117.802
	2017-05-12	14:56:00	29.105	117.803
	2017-05-12	15:40:00	29.1043	117.802
	2017-05-12	16:30:00	29.1042	117.803
	2017-05-12	17:15:00	29.1058	117.802
	2017-05-12	17:50:00	29.1047	117.802
	2017-05-13	07:20:00	29.1046	117.803
	2017-05-13	08:00:00	29.1041	117.802
	2017-05-13	09:40:00	29.1047	117.804
	2017-05-13	10:27:00	29.105	117.803
	2017-05-13	10:35:00	29.1042	117.803
	2017-05-13	14:50:00	29.1051	117.803
	2017-05-13	15:50:00	29.1051	117.803
	2017-05-13	16:40:00	29.1043	117.802
	2017-05-13	18:05:00	29.1047	117.802
	2017-05-14	17:05:00	29.1048	117.803
	2017-05-14	17:45:00	29.1056	117.802
	2017-05-14	18:20:00	29.1048	117.802
	2017-05-15	16:20:00	29.1062	117.803
	2017-05-15	17:00:00	29.1047	117.802
	2017-05-15	17:45:00	29.1048	117.803
	2017-05-16	08:05:00	29.1041	117.802
	2017-05-16	09:00:00	29.1048	117.803
	2017-05-16	16:00:00	29.1051	117.803
	2017-05-16	16:30:00	29.1059	117.802
	2017-05-16	17:12:00	29.1047	117.803
	2017-05-18	15:15:00	29.1042	117.803
	2017-05-18	15:25:00	29.1033	117.804
	2017-05-18	16:10:00	29.1042	117.803
	2017-05-18	16:55:00	29.1041	117.803
	2017-05-18	17:50:00	29.105	117.802
	2017-05-18	18:25:00	29.1052	117.803
	2017-05-18	18:40:00	29.1054	117.803
	2017-05-18	18:50:00	29.1055	117.804
	2017-05-19	10:16:00	29.1048	117.803
	2017-05-19	10:55:00	29.1049	117.803
	2017-05-19	11:23:00	29.1048	117.802
	2017-05-19	11:34:00	29.1053	117.802
	2017-05-19	17:45:00	29.1056	117.803
	2017-05-20	16:18:00	29.1051	117.803
	2017-05-20	17:05:00	29.1044	117.802
	2017-05-20	17:15:00	29.1049	117.803
	2017-05-20	18:25:00	29.1046	117.804
	2017-05-21	07:40:00	29.1047	117.803
	2017-05-21	08:18:00	29.1055	117.803
	2017-05-21	09:40:00	29.1042	117.803
	2017-05-21	10:25:00	29.1057	117.803
	2017-05-21	10:55:00	29.1049	117.803
	2017-05-21	11:03:00	29.104	117.802
	2017-05-21	17:00:00	29.1051	117.802
	2017-05-21	17:15:00	29.1045	117.803
	2017-05-21	17:50:00	29.1046	117.803
	2017-05-21	18:00:00	29.105	117.802
	2017-05-21	18:28:00	29.1051	117.802
	2017-05-22	15:50:00	29.105	117.802
	2017-05-22	16:33:00	29.1043	117.803
	2017-05-22	16:43:00	29.105	117.803
	2017-05-22	17:30:00	29.1059	117.803
	2017-05-22	17:56:00	29.1053	117.802
	2017-05-22	18:10:00	29.1045	117.802
	2017-05-22	18:35:00	29.1048	117.803
	2017-05-26	08:20:00	29.1047	117.803
	2017-05-26	08:50:00	29.1052	117.802
	2017-05-26	09:20:00	29.1044	117.803
	2017-05-26	09:50:00	29.1045	117.803
	2017-05-26	10:20:00	29.1063	117.803
	2017-05-26	11:20:00	29.1045	117.803
	2017-05-26	11:45:00	29.1043	117.802
	2017-05-26	16:00:00	29.1046	117.804
	2017-05-26	17:00:00	29.1042	117.803
	2017-05-26	17:34:00	29.1045	117.804
	2017-05-26	18:00:00	29.1053	117.803
	2017-05-26	18:30:00	29.1065	117.804
	2017-05-26	18:55:00	29.105	117.804
	2017-05-27	10:00:00	29.105	117.802
	2017-05-27	10:30:00	29.1046	117.803
	2017-05-27	11:00:00	29.105	117.802
	2017-05-27	16:20:00	29.1059	117.803
	2017-05-27	16:46:00	29.1036	117.803
	2017-05-27	17:20:00	29.1049	117.802
	2017-05-28	08:50:00	29.1043	117.803
	2017-05-28	09:03:00	29.1045	117.803
	2017-05-28	10:18:00	29.1041	117.802
	2017-05-28	10:55:00	29.1051	117.802
	2017-05-28	16:55:00	29.1064	117.804
	2017-05-28	17:15:00	29.1052	117.804
	2017-05-28	18:00:00	29.1045	117.803
	2017-05-28	18:15:00	29.1045	117.803
	2017-05-28	18:30:00	29.1043	117.802
	2017-05-31	07:50:00	29.1053	117.802
	2017-05-31	08:30:00	29.1038	117.802
	2017-05-31	09:04:00	29.104	117.803
	2017-05-31	09:35:00	29.1048	117.803
	2017-05-31	10:15:00	29.1048	117.803
	2017-05-31	10:45:00	29.1051	117.802
	2017-05-31	11:15:00	29.1051	117.803
	2017-05-31	17:20:00	29.105	117.801
	2017-05-31	17:40:00	29.1051	117.802
	2017-05-31	18:04:00	29.1046	117.803
	2017-05-31	18:10:00	29.1045	117.802
	2017-06-02	08:05:00	29.1049	117.803
	2017-06-02	08:35:00	29.1035	117.803
	2017-06-02	09:03:00	29.104	117.803
	2017-06-02	09:34:00	29.1048	117.803
	2017-06-02	09:37:00	29.1041	117.803
	2017-06-02	10:05:00	29.106	117.803
	2017-06-02	10:34:00	29.1043	117.803
	2017-06-02	10:35:00	29.1055	117.803
	2017-06-02	11:05:00	29.1051	117.803
	2017-06-02	11:35:00	29.1055	117.803
	2017-06-02	11:37:00	29.1052	117.804
	2017-06-02	17:08:00	29.1048	117.803
	2017-06-02	17:10:00	29.1048	117.804
	2017-06-02	17:40:00	29.1034	117.803
	2017-06-02	18:30:00	29.1039	117.803
	2017-06-03	06:50:00	29.1042	117.802
	2017-06-03	07:20:00	29.105	117.802
	2017-06-03	07:20:00	29.1048	117.802
	2017-06-03	07:50:00	29.1052	117.804
	2017-06-03	08:20:00	29.1061	117.804
	2017-06-03	08:50:00	29.1057	117.802
	2017-06-03	09:20:00	29.1048	117.803
	2017-06-03	09:50:00	29.1043	117.803
	2017-06-03	10:20:00	29.1042	117.803
	2017-06-03	10:20:00	29.1041	117.803
	2017-06-03	10:50:00	29.1047	117.803
	2017-06-03	10:50:00	29.1044	117.803
	2017-06-03	11:20:00	29.1056	117.804
	2017-06-03	11:20:00	29.1056	117.804
	2017-06-03	11:50:00	29.1064	117.804
	2017-06-03	16:55:00	29.1036	117.803
	2017-06-03	17:20:00	29.1048	117.803
	2017-06-03	17:20:00	29.1045	117.802
	2017-06-03	17:50:00	29.1043	117.803
	2017-06-03	18:50:00	29.1049	117.803
	2017-06-03	18:50:00	29.1041	117.803
	2017-06-04	07:20:00	29.1049	117.802
	2017-06-04	07:50:00	29.1051	117.803
	2017-06-04	08:20:00	29.1057	117.804
	2017-06-04	08:20:00	29.1045	117.802
	2017-06-04	08:50:00	29.1029	117.803
	2017-06-04	08:50:00	29.1054	117.804
	2017-06-04	09:20:00	29.105	117.804
	2017-06-04	09:20:00	29.1046	117.804
	2017-06-04	09:55:00	29.1046	117.803
	2017-06-04	10:20:00	29.106	117.804
	2017-06-04	16:00:00	29.1056	117.803
	2017-06-04	17:00:00	29.1044	117.803
	2017-06-04	17:00:00	29.1047	117.803
	2017-06-04	17:30:00	29.106	117.803
	2017-06-04	17:30:00	29.1039	117.804
	2017-06-04	18:00:00	29.105	117.804
	2017-06-04	18:00:00	29.1047	117.803
	2017-06-05	07:20:00	29.1048	117.803
	2017-06-05	07:50:00	29.1054	117.803
	2017-06-05	08:20:00	29.106	117.804
	2017-06-05	08:20:00	29.1049	117.802
	2017-06-05	08:43:00	29.1048	117.803
	2017-06-05	09:20:00	29.1055	117.804
	2017-06-05	10:20:00	29.1064	117.804
	2017-06-05	16:00:00	29.106	117.804
	2017-06-05	16:30:00	29.106	117.803
	2017-06-05	17:30:00	29.1055	117.803
	2017-06-05	18:00:00	29.1058	117.803
	2017-06-05	18:30:00	29.1059	117.804
	2017-06-10	08:10:00	29.1063	117.803
	2017-06-10	08:29:00	29.1051	117.803

## Sheet: 20175 processed data
	date	time	Y	X
	2017-05-19	17:05:00	29.1053	117.804
	2017-05-19	17:45:00	29.105	117.803
	2017-05-19	18:30:00	29.1043	117.804
	2017-05-20	15:35:00	29.1043	117.803
	2017-05-20	16:18:00	29.1042	117.803
	2017-05-20	17:05:00	29.1047	117.803
	2017-05-20	17:35:00	29.1051	117.802
	2017-05-20	17:52:00	29.1051	117.802
	2017-05-21	07:32:00	29.104	117.803
	2017-05-21	07:40:00	29.1046	117.803
	2017-05-21	08:18:00	29.102	117.801
	2017-05-21	09:40:00	29.1048	117.803
	2017-05-21	11:03:00	29.1048	117.803
	2017-05-21	11:34:00	29.105	117.802
	2017-05-21	15:48:00	29.1046	117.803
	2017-05-21	17:00:00	29.106	117.803
	2017-05-21	17:15:00	29.1042	117.803
	2017-05-21	17:50:00	29.1047	117.803
	2017-05-21	18:00:00	29.105	117.802
	2017-05-21	18:22:00	29.1046	117.802
	2017-05-21	18:28:00	29.1063	117.803
	2017-05-22	15:50:00	29.1049	117.802
	2017-05-22	16:33:00	29.104	117.803
	2017-05-22	16:43:00	29.1046	117.803
	2017-05-22	17:26:00	29.1051	117.802
	2017-05-22	17:30:00	29.1052	117.803
	2017-05-22	17:56:00	29.1054	117.803
	2017-05-22	18:10:00	29.1047	117.802
	2017-05-22	18:35:00	29.1057	117.803
	2017-05-26	08:20:00	29.1063	117.804
	2017-05-26	08:50:00	29.1032	117.803
	2017-05-26	08:50:00	29.1049	117.802
	2017-05-26	09:20:00	29.1047	117.803
	2017-05-26	10:20:00	29.1059	117.803
	2017-05-26	11:45:00	29.1045	117.802
	2017-05-26	16:30:00	29.1003	117.801
	2017-05-26	16:30:00	29.1021	117.802
	2017-05-26	17:00:00	29.1047	117.803
	2017-05-26	17:00:00	29.1046	117.802
	2017-05-26	17:30:00	29.1053	117.803
	2017-05-26	17:34:00	29.1052	117.802
	2017-05-26	18:28:00	29.1044	117.804
	2017-05-26	18:30:00	29.1033	117.804
	2017-05-27	10:00:00	29.1036	117.803
	2017-05-27	10:00:00	29.1052	117.802
	2017-05-27	10:30:00	29.1043	117.803
	2017-05-27	10:38:00	29.1055	117.803
	2017-05-27	11:00:00	29.1059	117.803
	2017-05-27	16:20:00	29.1038	117.803
	2017-05-27	17:20:00	29.1048	117.803
	2017-05-27	18:20:00	29.1037	117.804
	2017-05-28	07:19:00	29.1032	117.804
	2017-05-28	08:35:00	29.1038	117.803
	2017-05-28	09:03:00	29.1028	117.804
	2017-05-28	10:18:00	29.1049	117.803
	2017-05-28	10:55:00	29.1059	117.804
	2017-05-28	16:55:00	29.1057	117.804
	2017-05-28	17:15:00	29.1056	117.804
	2017-05-28	17:30:00	29.1036	117.805
	2017-05-28	18:30:00	29.107	117.804
	2017-05-31	07:20:00	29.1037	117.804
	2017-05-31	07:50:00	29.1047	117.802
	2017-05-31	08:30:00	29.1045	117.803
	2017-05-31	09:04:00	29.1043	117.803
	2017-05-31	09:35:00	29.1054	117.803
	2017-05-31	10:15:00	29.1042	117.802
	2017-05-31	10:45:00	29.1048	117.803
	2017-05-31	11:15:00	29.1052	117.803
	2017-05-31	11:40:00	29.1058	117.804
	2017-05-31	17:02:00	29.1038	117.801
	2017-05-31	17:20:00	29.1052	117.802
	2017-05-31	18:04:00	29.1046	117.803
	2017-05-31	18:10:00	29.1056	117.804
	2017-06-02	08:05:00	29.1046	117.802
	2017-06-02	08:35:00	29.1046	117.802
	2017-06-02	08:53:00	29.1058	117.803
	2017-06-02	09:05:00	29.1048	117.802
	2017-06-02	09:34:00	29.1048	117.803
	2017-06-02	09:37:00	29.1049	117.803
	2017-06-02	10:05:00	29.1057	117.803
	2017-06-02	10:34:00	29.105	117.804
	2017-06-02	11:35:00	29.1053	117.803
	2017-06-02	11:37:00	29.1063	117.803
	2017-06-02	16:30:00	29.1048	117.802
	2017-06-02	17:08:00	29.1043	117.803
	2017-06-02	17:10:00	29.1036	117.803
	2017-06-02	17:40:00	29.1055	117.803
	2017-06-02	17:40:00	29.1057	117.802
	2017-06-02	18:10:00	29.1059	117.804
	2017-06-02	18:30:00	29.1045	117.803
	2017-06-03	07:20:00	29.1037	117.802
	2017-06-03	07:20:00	29.1048	117.803
	2017-06-03	07:50:00	29.1053	117.804
	2017-06-03	07:50:00	29.1057	117.802
	2017-06-03	08:20:00	29.1047	117.802
	2017-06-03	08:20:00	29.1048	117.803
	2017-06-03	08:50:00	29.1038	117.803
	2017-06-03	08:50:00	29.1043	117.803
	2017-06-03	09:20:00	29.1055	117.804
	2017-06-03	09:50:00	29.1036	117.804
	2017-06-03	09:50:00	29.1054	117.804
	2017-06-03	10:20:00	29.1046	117.803
	2017-06-03	10:50:00	29.1054	117.804
	2017-06-03	11:20:00	29.1065	117.803
	2017-06-03	11:50:00	29.1048	117.803
	2017-06-03	16:50:00	29.1042	117.802
	2017-06-03	17:20:00	29.1024	117.801
	2017-06-03	17:20:00	29.1045	117.803
	2017-06-03	17:50:00	29.104	117.803
	2017-06-03	17:50:00	29.1042	117.803
	2017-06-03	18:20:00	29.1031	117.803
	2017-06-03	18:20:00	29.1048	117.804
	2017-06-03	18:50:00	29.1046	117.802
	2017-06-03	18:50:00	29.1047	117.802
	2017-06-04	07:20:00	29.1044	117.802
	2017-06-04	07:20:00	29.1052	117.803
	2017-06-04	07:50:00	29.1051	117.803
	2017-06-04	07:50:00	29.1052	117.802
	2017-06-04	08:20:00	29.1053	117.803
	2017-06-04	08:50:00	29.106	117.804
	2017-06-04	09:20:00	29.1047	117.802
	2017-06-04	09:20:00	29.1049	117.802
	2017-06-04	09:50:00	29.1058	117.804
	2017-06-04	09:55:00	29.1042	117.802
	2017-06-04	10:20:00	29.1061	117.804
	2017-06-04	10:50:00	29.1042	117.803
	2017-06-04	11:50:00	29.1041	117.804
	2017-06-04	17:00:00	29.105	117.803
	2017-06-04	17:30:00	29.1056	117.802
	2017-06-04	18:00:00	29.1037	117.802
	2017-06-04	18:00:00	29.1041	117.803
	2017-06-04	18:30:00	29.1048	117.803
	2017-06-04	18:30:00	29.1054	117.803
	2017-06-05	07:50:00	29.1055	117.803
	2017-06-05	07:50:00	29.1056	117.803
	2017-06-05	08:20:00	29.1031	117.801
	2017-06-05	08:20:00	29.1045	117.802
	2017-06-05	08:43:00	29.1057	117.803
	2017-06-05	08:50:00	29.106	117.804
	2017-06-05	09:50:00	29.1041	117.804
	2017-06-05	17:00:00	29.1051	117.803
	2017-06-05	18:30:00	29.1061	117.804
	2017-06-10	07:20:00	29.1026	117.802
	2017-06-10	09:00:00	29.105	117.803
	2017-06-10	09:30:00	29.1055	117.802
	2017-06-10	10:30:00	29.1035	117.802
	2017-06-10	11:30:00	29.1047	117.803
	2017-06-10	17:37:00	29.1062	117.803
	2017-06-10	18:00:00	29.1051	117.803
	2017-06-13	15:26:00	29.1023	117.802
	2017-06-13	17:05:00	29.1005	117.8
	2017-06-13	17:30:00	29.1053	117.802
	2017-06-16	07:41:00	29.1013	117.802
	2017-06-16	07:44:00	29.1006	117.802
	2017-06-19	08:02:00	29.1022	117.801
	2017-06-20	07:50:00	29.1017	117.802
	2017-06-20	16:34:00	29.1016	117.802
